# Supplementary material for: Differentiating salmonid migratory ecotypes through stable isotope analysis of collagen: Archaeological and ecological applications
Source: PubMed Central journal article supplement (PMC7188214; doi:10.1371/journal.pone.0232180), 2020-04-28
Supplement: pone.0232180.s001.pdf [file pone.0232180.s001.pdf]

## S1 Text – Stable Isotope Analysis

$\delta^{13}\text{C}$  and  $\delta^{15}\text{N}$  were measured with an elemental analyzer (EA) coupled via continuous flow to an isotope ratio mass spectrometer (CF-IRMS) at The University of British Columbia (UBC) (Vancouver, BC) and at Trent University (TU) (Peterborough, ON). A Vario MICRO cube EA coupled to an Isoprime IRMS (Elementar, Hanover, Germany) was used at UBC and n EA 300 (Eurovector, Pavia, Italy) coupled to a Horizon IRMS (Nu Instruments, Wrexham, UK) was used at TU. Isotopic measurements were calibrated relative to VPDB ( $\delta^{13}\text{C}$ ) and AIR ( $\delta^{15}\text{N}$ ) using USGS40 and USGS41 (Qi, et al. 2003) or USGS41a (Qi, et al. 2016) (Table 1). Internal check standards (Table 1) with known long-term averages were used to monitor analytical accuracy. Table 2 shows the standard deviations ( $1\sigma$ ) and number of analyses for calibration standards for each analytical session. Table 3 shows mean and standard deviation ( $1\sigma$ ) of  $\delta^{13}\text{C}$  and  $\delta^{15}\text{N}$  for check standards for all analytical sessions. Analytical uncertainty was calculated following (Szpak, et al. 2017). For  $\delta^{13}\text{C}$  and  $\delta^{15}\text{N}$  random errors ( $u_{R(w)}$ ) was calculated to  $\pm 0.08$  ‰ and  $\pm 0.15$  ‰, respectively, systematic errors ( $u_{(bias)}$ ) for  $\delta^{13}\text{C}$  and  $\delta^{15}\text{N}$  were calculated to be  $\pm 0.10$  ‰ and  $\pm 0.15$  ‰, respectively.. Standard uncertainty was calculated to be  $\pm 0.13$  for  $\delta^{13}\text{C}$  and  $\pm 0.21$  for  $\delta^{15}\text{N}$ . Isotopic composition, elemental concentration, and contextual data for samples analyzed in this study are shown in Table 5.

**Table 1.** Accepted  $\delta$  values for calibrations standards and long-term averages (with  $1\sigma$ ) for collagen check standards used in this study.

| Name    | Material                 | Number | $\delta^{13}\text{C}$ (‰, VPDB) | $\delta^{15}\text{N}$ (‰, AIR) | Standard Type        |
|---------|--------------------------|--------|---------------------------------|--------------------------------|----------------------|
| USGS40  | Glutamic acid            | NA     | -26.39                          | -4.52                          | Calibration standard |
| USGS41  | Glutamic acid            | NA     | +37.63                          | +47.57                         | Calibration standard |
| USGS41a | Glutamic acid            | NA     | +36.55                          | +47.55                         | Calibration standard |
| MET     | Methionine               | 1046   | -28.62 $\pm$ 0.11               | -5.03 $\pm$ 0.15               | Check standard       |
| SRM-1   | Caribou bone collagen    | 461    | -19.36 $\pm$ 0.11               | +1.81 $\pm$ 0.10               | Check standard       |
| SRM-3   | Commercial Gelatin       | 94     | -15.30 $\pm$ 0.17               | +5.09 $\pm$ 0.15               | Check standard       |
| SRM-14  | Polar bear bone collagen | 128    | -13.66 $\pm$ 0.06               | +21.63 $\pm$ 0.11              | Check standard       |
| SRM-15  | Deer bone collagen       | 104    | -26.88 $\pm$ 0.05               | +6.90 $\pm$ 0.08               | Check standard       |
| SRM-16  | Seal bone collagen       | 132    | -14.81 $\pm$ 0.10               | +16.91 $\pm$ 0.08              | Check standard       |

**Table 2.** Standard deviations ( $1\sigma$ ) for  $\delta^{13}\text{C}$  and  $\delta^{15}\text{N}$  of calibration standards for all analytical sessions included in this study.

| Run ID  | Standard | Number | $\delta^{13}\text{C}$ ( $1\sigma$ ) | $\delta^{15}\text{N}$ ( $1\sigma$ ) |
|---------|----------|--------|-------------------------------------|-------------------------------------|
| CN19-13 | USGS40   | 9      | 0.04                                | 0.15                                |
| CN19-12 | USGS40   | 9      | 0.02                                | 0.17                                |
| CN19-09 | USGS40   | 9      | 0.05                                | 0.12                                |
| CN19-05 | USGS40   | 9      | 0.07                                | 0.16                                |
| CN19-02 | USGS40   | 5      | 0.09                                | 0.18                                |
| CN19-01 | USGS40   | 4      | 0.07                                | 0.24                                |
| CN18-16 | USGS40   | 9      | 0.03                                | 0.10                                |
| CN18-09 | USGS40   | 11     | 0.07                                | 0.05                                |
| CN18-08 | USGS40   | 9      | 0.04                                | 0.05                                |
| CN18-06 | USGS40   | 9      | 0.06                                | 0.05                                |
| CN17-32 | USGS40   | 10     | 0.03                                | 0.05                                |
| CN17-31 | USGS40   | 11     | 0.05                                | 0.03                                |
| CN17-30 | USGS40   | 9      | 0.06                                | 0.03                                |
| CN19-13 | USGS41a  | 9      | 0.08                                | 0.19                                |
| CN19-12 | USGS41a  | 8      | 0.06                                | 0.20                                |
| CN19-09 | USGS41a  | 7      | 0.03                                | 0.21                                |
| CN19-05 | USGS41a  | 9      | 0.06                                | 0.16                                |
| CN19-02 | USGS41a  | 5      | 0.03                                | 0.13                                |
| CN19-01 | USGS41a  | 4      | 0.23                                | 0.24                                |
| CN18-16 | USGS41a  | 9      | 0.08                                | 0.16                                |
| CN18-09 | USGS41a  | 9      | 0.05                                | 0.05                                |
| CN18-08 | USGS41a  | 9      | 0.05                                | 0.18                                |
| CN18-06 | USGS41a  | 9      | 0.08                                | 0.05                                |
| CN17-32 | USGS41a  | 10     | 0.02                                | 0.15                                |
| CN17-31 | USGS41a  | 11     | 0.03                                | 0.16                                |
| CN17-30 | USGS41a  | 8      | 0.09                                | 0.16                                |

**Table 3.** Mean and standard deviation ( $1\sigma$ ) of  $\delta^{13}\text{C}$  and  $\delta^{15}\text{N}$  for check standards for all analytical sessions.

| Run ID  | Standard | Number | $\delta^{13}\text{C}$ ( $1\sigma$ ) | $\delta^{15}\text{N}$ ( $1\sigma$ ) |
|---------|----------|--------|-------------------------------------|-------------------------------------|
| CN19-13 | MET      | 7      | -28.61 $\pm$ 0.04                   | -5.16 $\pm$ 0.18                    |
| CN19-12 | MET      | 7      | -28.59 $\pm$ 0.03                   | -5.13 $\pm$ 0.15                    |
| CN19-09 | MET      | 6      | -28.57 $\pm$ 0.05                   | -5.23 $\pm$ 0.12                    |
| CN19-05 | MET      | 7      | -28.57 $\pm$ 0.03                   | -5.20 $\pm$ 0.25                    |
| CN19-01 | MET      | 3      | -28.64 $\pm$ 0.10                   | -5.19 $\pm$ 0.33                    |
| CN18-16 | MET      | 7      | -28.58 $\pm$ 0.03                   | -5.04 $\pm$ 0.14                    |
| CN18-09 | MET      | 6      | -28.63 $\pm$ 0.06                   | -5.04 $\pm$ 0.06                    |
| CN18-08 | MET      | 7      | -28.63 $\pm$ 0.04                   | -5.09 $\pm$ 0.13                    |
| CN18-06 | MET      | 7      | -28.56 $\pm$ 0.05                   | -5.09 $\pm$ 0.13                    |
| CN17-32 | MET      | 8      | -28.62 $\pm$ 0.03                   | -5.09 $\pm$ 0.10                    |
| CN17-31 | MET      | 7      | -28.62 $\pm$ 0.05                   | -5.07 $\pm$ 0.08                    |
| CN17-30 | MET      | 7      | -28.62 $\pm$ 0.06                   | -5.04 $\pm$ 0.04                    |
| CN17-18 | SRM-1    | 4      | -19.37 $\pm$ 0.02                   | 1.77 $\pm$ 0.03                     |
| CN17-32 | SRM-1    | 5      | -19.37 $\pm$ 0.04                   | 1.78 $\pm$ 0.02                     |
| CN17-31 | SRM-1    | 6      | -19.38 $\pm$ 0.03                   | 1.78 $\pm$ 0.04                     |
| CN18-09 | SRM-3    | 9      | -15.23 $\pm$ 0.06                   | 5.15 $\pm$ 0.09                     |
| CN18-08 | SRM-3    | 6      | -15.36 $\pm$ 0.13                   | 5.02 $\pm$ 0.06                     |
| CN18-06 | SRM-3    | 9      | -15.38 $\pm$ 0.17                   | 5.13 $\pm$ 0.09                     |
| CN19-02 | SRM-14   | 5      | -13.68 $\pm$ 0.05                   | 21.80 $\pm$ 0.14                    |
| CN17-32 | SRM-14   | 3      | -13.66 $\pm$ 0.04                   | 21.59 $\pm$ 0.05                    |
| CN17-31 | SRM-14   | 5      | -13.70 $\pm$ 0.07                   | 21.55 $\pm$ 0.04                    |
| CN17-30 | SRM-14   | 5      | -13.68 $\pm$ 0.06                   | 21.60 $\pm$ 0.06                    |
| CN19-13 | SRM-15   | 6      | -26.88 $\pm$ 0.02                   | 6.94 $\pm$ 0.14                     |
| CN19-12 | SRM-15   | 5      | -26.88 $\pm$ 0.05                   | 6.87 $\pm$ 0.19                     |
| CN19-09 | SRM-15   | 6      | -26.88 $\pm$ 0.03                   | 6.94 $\pm$ 0.08                     |
| CN19-05 | SRM-15   | 6      | -26.88 $\pm$ 0.03                   | 6.97 $\pm$ 0.12                     |
| CN19-02 | SRM-15   | 3      | -26.86 $\pm$ 0.03                   | 6.77 $\pm$ 0.06                     |
| CN19-01 | SRM-15   | 3      | -26.94 $\pm$ 0.16                   | 6.74 $\pm$ 0.38                     |
| CN18-09 | SRM-15   | 6      | -26.86 $\pm$ 0.03                   | 6.83 $\pm$ 0.12                     |
| CN17-32 | SRM-15   | 6      | -26.90 $\pm$ 0.02                   | 6.83 $\pm$ 0.07                     |
| CN17-31 | SRM-15   | 3      | -26.92 $\pm$ 0.01                   | 6.80 $\pm$ 0.11                     |
| CN17-30 | SRM-15   | 3      | -26.88 $\pm$ 0.02                   | 6.88 $\pm$ 0.01                     |
| CN19-13 | SRM-16   | 5      | -14.79 $\pm$ 0.02                   | 16.96 $\pm$ 0.09                    |
| CN19-12 | SRM-16   | 4      | -14.80 $\pm$ 0.03                   | 16.96 $\pm$ 0.13                    |
| CN19-09 | SRM-16   | 3      | -14.78 $\pm$ 0.07                   | 17.01 $\pm$ 0.11                    |
| CN19-05 | SRM-16   | 5      | -14.80 $\pm$ 0.05                   | 16.95 $\pm$ 0.12                    |
| CN18-16 | SRM-16   | 5      | -14.79 $\pm$ 0.03                   | 16.97 $\pm$ 0.11                    |
| CN18-09 | SRM-16   | 6      | -14.78 $\pm$ 0.06                   | 16.91 $\pm$ 0.08                    |
| CN18-08 | SRM-16   | 5      | -14.79 $\pm$ 0.03                   | 16.85 $\pm$ 0.04                    |
| CN18-06 | SRM-16   | 5      | -14.79 $\pm$ 0.06                   | 16.88 $\pm$ 0.04                    |

|         |        |   |               |              |
|---------|--------|---|---------------|--------------|
| CN17-32 | SRM-16 | 6 | -14.85 ± 0.05 | 16.85 ± 0.05 |
| CN17-31 | SRM-16 | 3 | -14.88 ± 0.06 | 16.83 ± 0.05 |
| CN17-30 | SRM-16 | 3 | -14.78 ± 0.02 | 16.89 ± 0.02 |

**Table 4.** Standard deviations ( $1\sigma$ ) for all replicates.

| Standard  | Number | $\delta^{13}\text{C}$ ( $1\sigma$ ) | $\delta^{15}\text{N}$ ( $1\sigma$ ) |
|-----------|--------|-------------------------------------|-------------------------------------|
| TEAL 1710 | 2      | 0.03                                | 0.19                                |
| TEAL 1713 | 2      | 0.05                                | 0.10                                |
| TEAL 1719 | 2      | 0.09                                | 0.17                                |
| TEAL 3911 | 2      | 0.14                                | 0.05                                |
| TEAL 3914 | 2      | 0.05                                | 0.22                                |
| IUBC 4068 | 2      | 0.03                                | 0.06                                |
| IUBC 4069 | 2      | 0.01                                | 0.03                                |
| IUBC 4086 | 2      | 0.01                                | 0.05                                |
| IUBC 4087 | 2      | 0.08                                | 0.14                                |
| IUBC 4089 | 2      | 0.03                                | 0.10                                |
| IUBC 4094 | 2      | 0.14                                | 0.04                                |
| IUBC 4098 | 2      | 0.01                                | 0.18                                |
| IUBC 4099 | 3      | 0.08                                | 0.08                                |
| IUBC 4382 | 2      | 0.11                                | 0.04                                |
| IUBC 5166 | 2      | 0.05                                | 0.00                                |
| IUBC 5182 | 2      | 0.06                                | 0.03                                |
| IUBC 5214 | 2      | 0.04                                | 0.04                                |
| IUBC 5218 | 2      | 0.11                                | 0.26                                |
| IUBC 5220 | 2      | 0.03                                | 0.05                                |
| IUBC 5222 | 2      | 0.00                                | 0.10                                |
| IUBC 5227 | 2      | 0.00                                | 0.10                                |
| IUBC 5279 | 2      | 0.11                                | 0.02                                |
| IUBC 5291 | 2      | 0.04                                | 0.03                                |
| IUBC 5294 | 2      | 0.04                                | 0.05                                |
| IUBC 5295 | 2      | 0.04                                | 0.01                                |
| IUBC 5300 | 2      | 0.07                                | 0.04                                |
| IUBC 5310 | 2      | 0.09                                | 0.03                                |
| IUBC 5313 | 2      | 0.02                                | 0.08                                |
| IUBC 5318 | 2      | 0.15                                | 0.04                                |
| IUBC 5320 | 2      | 0.05                                | 0.06                                |
| IUBC 5322 | 2      | 0.04                                | 0.04                                |
| IUBC 5324 | 2      | 0.01                                | 0.02                                |
| IUBC 5329 | 2      | 0.03                                | 0.01                                |
| IUBC 5330 | 2      | 0.08                                | 0.00                                |
| IUBC 5345 | 2      | 0.05                                | 0.24                                |
| IUBC 5358 | 2      | 0.10                                | 0.12                                |

|           |   |      |      |
|-----------|---|------|------|
| IUBC 5362 | 2 | 0.04 | 0.08 |
| IUBC 5371 | 2 | 0.07 | 0.03 |
| IUBC 5383 | 2 | 0.00 | 0.09 |
| IUBC 5384 | 2 | 0.08 | 0.04 |
| IUBC 5389 | 2 | 0.05 | 0.10 |
| IUBC 5394 | 2 | 0.04 | 0.02 |
| IUBC 5395 | 2 | 0.01 | 0.04 |
| IUBC 5398 | 2 | 0.11 | 0.11 |
| IUBC 5405 | 2 | 0.01 | 0.05 |
| IUBC 5406 | 2 | 0.03 | 0.05 |
| IUBC 5410 | 2 | 0.05 | 0.09 |
| IUBC 5413 | 2 | 0.08 | 0.06 |
| IUBC 5417 | 2 | 0.05 | 0.01 |
| IUBC 6950 | 2 | 0.02 | 0.11 |
| IUBC 6952 | 2 | 0.08 | 0.23 |
| IUBC 6954 | 2 | 0.06 | 0.09 |
| IUBC 6962 | 2 | 0.16 | 0.06 |
| IUBC 6968 | 2 | 0.16 | 0.04 |

**Table 5.** Isotopic and elemental compositions as well and contextual details for samples included in this study. Samples with IUBC and TEAL prefixes were analyzed at TU and UBC, respectively. For data sourced from the literature see (Guiry, et al. 2016; Horii, et al. 2015; Kaeriyama, et al. 2004; Meeuwig and Peacock 2017; Molkentin, et al. 2015; Overman and Parrish 2001; Qin and Kaeriyama 2016; Satterfield and Finney 2002; Wang, et al. 2018; Welch and Parsons 1993). For sample donors: RBCM is the Royal British Columbia Museum (Victoria, BC, Canada), BBM is the Beaty Biodiversity Museum (Vancouver, BC Canada), ROM is the Royal Ontario Museum (Toronto, ON, Canada), FLNR is the Ministry of Forests, Lands and Natural Resource Operations (Penticton, BC, Canada), and XFN is the Xenigwet'in First Nation (curated at the Department of Anthropology University of British Columbia, Vancouver, BC Canada). Sample provided by coauthors are identified by their respective initials. Capture date is displayed as year-month-day (where information on date and month are unknown, a "00" is given). For collagen  $\delta^{13}\text{C}$ , asterisks mark samples for which collagen  $\delta^{13}\text{C}$  values have been calculated based on previously published muscle data following Satterfield and Finney (2002).  $\delta^{13}\text{C}_{\text{cor}}$  shows values corrected for formalin fixation, Suess effect, and muscle-collagen offset where applicable. For *a priori* ecotype: 1 is potamodromous, 2 is anadromous, 3 is archaeological unknowns, 4 is archival unknowns, and 5 is modern unknowns. For  $\delta^{13}\text{C}$  ecotype ID; 1 is 1 is potamodromous and 2 is anadromous,

| Source/Donor     | Lab No.   | Cat No | Site Name          | Latitude | Longitude | Prov. State | Capture Date | Material | Col. Yld. % | Mus. $\delta^{13}\text{C}$ | Mus. %C | Mus. %N | Mus. C:N | Mus. $\delta^{13}\text{C}$ , lipid cor. | Col. $\delta^{13}\text{C}$ | Form. cor. | Suess cor. (‰) | $\delta^{13}\text{C}_{\text{cor}}$ | $\delta^{15}\text{N}$ | Col. %C | Col. %N | Col. C:N | <i>A priori</i> ecotype | $\delta^{13}\text{C}$ ecotype ID | Notes |
|------------------|-----------|--------|--------------------|----------|-----------|-------------|--------------|----------|-------------|----------------------------|---------|---------|----------|-----------------------------------------|----------------------------|------------|----------------|------------------------------------|-----------------------|---------|---------|----------|-------------------------|----------------------------------|-------|
| This study, FLNR | IUBC 5310 | 539    | Alouette Reservoir | 49.334   | -122.418  | BC          | 2013-09-25   | Scale    |             |                            |         |         |          |                                         | -20.8                      | n          | 2.1            | -18.7                              | 6.0                   | 41.8    | 15.2    | 3.21     | 1                       |                                  |       |
| This study, FLNR | IUBC 5311 | 542    | Alouette Reservoir | 49.334   | -122.418  | BC          | 2013-09-25   | Scale    |             |                            |         |         |          |                                         | -21.6                      | n          | 2.1            | -19.5                              | 8.1                   | 42.1    | 15.6    | 3.14     | 1                       |                                  |       |
| This study, FLNR | IUBC 5312 | 543    | Alouette Reservoir | 49.334   | -122.418  | BC          | 2013-09-25   | Scale    |             |                            |         |         |          |                                         | -20.9                      | n          | 2.1            | -18.8                              | 6.3                   | 42.8    | 15.4    | 3.24     | 1                       |                                  |       |
| This study, FLNR | IUBC 5313 | 544    | Alouette Reservoir | 49.334   | -122.418  | BC          | 2013-09-25   | Scale    |             |                            |         |         |          |                                         | -20.9                      | n          | 2.1            | -18.8                              | 6.2                   | 43.0    | 15.2    | 3.31     | 1                       |                                  |       |
| This study, FLNR | IUBC 5314 | 545    | Alouette Reservoir | 49.334   | -122.418  | BC          | 2013-09-25   | Scale    |             |                            |         |         |          |                                         | -20.7                      | n          | 2.1            | -18.7                              | 6.0                   | 42.8    | 15.4    | 3.24     | 1                       |                                  |       |
| This study, FLNR | IUBC 5315 | 547    | Alouette Reservoir | 49.334   | -122.418  | BC          | 2013-09-25   | Scale    |             |                            |         |         |          |                                         | -21.3                      | n          | 2.1            | -19.2                              | 6.2                   | 42.7    | 15.1    | 3.29     | 1                       |                                  |       |
| This study, FLNR | IUBC 5316 | 552    | Alouette Reservoir | 49.334   | -122.418  | BC          | 2013-09-25   | Scale    |             |                            |         |         |          |                                         | -20.7                      | n          | 2.1            | -18.6                              | 6.0                   | 42.8    | 15.4    | 3.25     | 1                       |                                  |       |
| This study, FLNR | IUBC 5317 | 553    | Alouette Reservoir | 49.334   | -122.418  | BC          | 2013-09-25   | Scale    |             |                            |         |         |          |                                         | -20.5                      | n          | 2.1            | -18.4                              | 6.3                   | 42.7    | 15.4    | 3.24     | 1                       |                                  |       |
| This study, FLNR | IUBC 5318 | 554    | Alouette Reservoir | 49.334   | -122.418  | BC          | 2013-09-25   | Scale    |             |                            |         |         |          |                                         | -21.0                      | n          | 2.1            | -19.0                              | 6.6                   | 42.6    | 15.4    | 3.24     | 1                       |                                  |       |
| This study, FLNR | IUBC 5319 | 557    | Alouette Reservoir | 49.334   | -122.418  | BC          | 2013-09-25   | Scale    |             |                            |         |         |          |                                         | -20.5                      | n          | 2.1            | -18.4                              | 6.9                   | 42.5    | 15.3    | 3.25     | 1                       |                                  |       |
| This study, FLNR | IUBC 5320 | 637    | Alouette Reservoir | 49.334   | -122.418  | BC          | 2013-09-26   | Scale    |             |                            |         |         |          |                                         | -21.6                      | n          | 2.1            | -19.5                              | 6.3                   | 42.8    | 15.1    | 3.29     | 1                       |                                  |       |
| This study, FLNR | IUBC 5321 | 541    | Alouette Reservoir | 49.334   | -122.418  | BC          | 2013-09-26   | Scale    |             |                            |         |         |          |                                         | -20.2                      | n          | 2.1            | -18.1                              | 6.4                   | 41.8    | 15.0    | 3.25     | 1                       |                                  |       |
| This study, FLNR | IUBC 5322 | 642    | Alouette Reservoir | 49.334   | -122.418  | BC          | 2013-09-26   | Scale    |             |                            |         |         |          |                                         | -20.5                      | n          | 2.1            | -18.5                              | 6.3                   | 43.3    | 15.0    | 3.36     | 1                       |                                  |       |
| This study, FLNR | IUBC 5323 | 643    | Alouette Reservoir | 49.334   | -122.418  | BC          | 2013-09-26   | Scale    |             |                            |         |         |          |                                         | -20.7                      | n          | 2.1            | -18.6                              | 6.3                   | 47.8    | 16.8    | 3.32     | 1                       |                                  |       |
| This study, FLNR | IUBC 5324 | 651    | Alouette Reservoir | 49.334   | -122.418  | BC          | 2013-09-26   | Scale    |             |                            |         |         |          |                                         | -20.9                      | n          | 2.1            | -18.8                              | 6.1                   | 47.7    | 17.3    | 3.22     | 1                       |                                  |       |
| This study, FLNR | IUBC 5355 | AR 2   | Arrow Lake         | 50.442   | -117.932  | BC          | 2010-10-10   | Scale    |             |                            |         |         |          |                                         | -23.0                      | n          | 1.9            | -21.0                              | 7.4                   | 42.0    | 16.1    | 3.04     | 1                       |                                  |       |
| This study, FLNR | IUBC 5356 | AR5    | Arrow Lake         | 50.442   | -117.932  | BC          | 2010-10-05   | Scale    |             |                            |         |         |          |                                         | -22.1                      | n          | 1.9            | -20.2                              | 6.7                   | 41.9    | 15.6    | 3.14     | 1                       |                                  |       |
| This study, FLNR | IUBC 5357 | AR10   | Arrow Lake         | 50.442   | -117.932  | BC          | 2010-10-06   | Scale    |             |                            |         |         |          |                                         | -22.2                      | n          | 1.9            | -20.2                              | 7.3                   | 35.3    | 13.1    | 3.14     | 1                       |                                  |       |
| This study, FLNR | IUBC 5358 | AR16   | Arrow Lake         | 50.442   | -117.932  | BC          | 2010-10-06   | Scale    |             |                            |         |         |          |                                         | -22.9                      | n          | 1.9            | -20.9                              | 7.7                   | 41.7    | 14.9    | 3.26     | 1                       |                                  |       |
| This study, FLNR | IUBC 5359 | AR17   | Arrow Lake         | 50.442   | -117.932  | BC          | 2010-10-06   | Scale    |             |                            |         |         |          |                                         | -21.8                      | n          | 1.9            | -19.9                              | 7.0                   | 42.0    | 15.6    | 3.13     | 1                       |                                  |       |
| This study, FLNR | IUBC 5360 | AR18   | Arrow Lake         | 50.442   | -117.932  | BC          | 2010-10-06   | Scale    |             |                            |         |         |          |                                         | -22.2                      | n          | 1.9            | -20.2                              | 7.7                   | 41.9    | 15.9    | 3.07     | 1                       |                                  |       |
| This study, FLNR | IUBC 5361 | AR20   | Arrow Lake         | 50.442   | -117.932  | BC          | 2010-10-06   | Scale    |             |                            |         |         |          |                                         | -22.4                      | n          | 1.9            | -20.4                              | 7.3                   | 41.8    | 15.5    | 3.15     | 1                       |                                  |       |
| This study, FLNR | IUBC 5362 | AR21   | Arrow Lake         | 50.442   | -117.932  | BC          | 2010-10-06   | Scale    |             |                            |         |         |          |                                         | -21.9                      | n          | 1.9            | -20.0                              | 7.5                   | 41.7    | 15.6    | 3.11     | 1                       |                                  |       |
| This study, FLNR | IUBC 5363 | AR25   | Arrow Lake         | 50.442   | -117.932  | BC          | 2010-10-08   | Scale    |             |                            |         |         |          |                                         | -24.3                      | n          | 1.9            | -22.3                              | 7.6                   | 41.9    | 15.6    | 3.14     | 1                       |                                  |       |
| This study, FLNR | IUBC 5364 | AR32   | Arrow Lake         | 50.442   | -117.932  | BC          | 2010-10-11   | Scale    |             |                            |         |         |          |                                         | -24.4                      | n          | 1.9            | -22.5                              | 7.7                   | 41.0    | 15.3    | 3.12     | 1                       |                                  |       |
| This study, FLNR | IUBC 5365 | AR50   | Arrow Lake         | 50.442   | -117.932  | BC          | 2010-10-11   | Scale    |             |                            |         |         |          |                                         | -23.7                      | n          | 1.9            | -21.8                              | 7.2                   | 42.2    | 15.7    | 3.14     | 1                       |                                  |       |
| This study, FLNR | IUBC 5366 | AR51   | Arrow Lake         | 50.442   | -117.932  | BC          | 2010-10-11   | Scale    |             |                            |         |         |          |                                         | -22.4                      | n          | 1.9            | -20.5                              | 7.4                   | 42.4    | 15.7    | 3.15     | 1                       |                                  |       |
| This study, FLNR | IUBC 5367 | AR52   | Arrow Lake         | 50.442   | -117.932  | BC          | 2010-10-11   | Scale    |             |                            |         |         |          |                                         | -23.8                      | n          | 1.9            | -21.9                              | 7.9                   | 42.2    | 15.7    | 3.14     | 1                       |                                  |       |
| This study, FLNR | IUBC 5368 | AR53   | Arrow Lake         | 50.442   | -117.932  | BC          | 2010-10-11   | Scale    |             |                            |         |         |          |                                         | -23.2                      | n          | 1.9            | -21.3                              | 7.1                   | 42.0    | 15.9    | 3.08     | 1                       |                                  |       |
| This study, FLNR | IUBC 5369 | AR54   | Arrow Lake         | 50.442   | -117.932  | BC          | 2010-10-11   | Scale    |             |                            |         |         |          |                                         | -22.1                      | n          | 1.9            | -20.2                              | 7.4                   | 42.4    | 15.6    | 3.16     | 1                       |                                  |       |
| This study, FLNR | IUBC 5370 | AR56   | Arrow Lake         | 50.442   | -117.932  | BC          | 2010-10-11   | Scale    |             |                            |         |         |          |                                         | -22.7                      | n          | 1.9            | -20.8                              | 7.9                   | 42.4    | 15.6    | 3.17     | 1                       |                                  |       |
| This study, FLNR | IUBC 5305 | CL-1   | Christina Lake     | 49.139   | -118.265  | BC          | 2005-07-07   | Scale    |             |                            |         |         |          |                                         | -27.2                      | n          | 1.7            | -25.5                              | 7.6                   | 42.2    | 15.2    | 3.23     | 1                       |                                  |       |
| This study, FLNR | IUBC 5307 | CL-4   | Christina Lake     | 49.139   | -118.265  | BC          | 2005-07-07   | Scale    |             |                            |         |         |          |                                         | -27.7                      | n          | 1.7            | -25.9                              | 7.7                   | 41.9    | 15.5    | 3.16     | 1                       |                                  |       |
| This study, FLNR | IUBC 5308 | CL-5   | Christina Lake     | 49.139   | -118.265  | BC          | 2005-07-07   | Scale    |             |                            |         |         |          |                                         | -28.6                      | n          | 1.7            | -26.9                              | 8.1                   | 42.0    | 15.1    | 3.24     | 1                       |                                  |       |
| This study, FLNR | IUBC 5401 | 1      | Comox Lake         | 49.619   | -125.166  | BC          | 2009-07-31   | Scale    |             |                            |         |         |          |                                         | -27.5                      | n          | 1.9            | -25.6                              | 6.5                   | 46.1    | 16.9    | 3.18     | 1                       |                                  |       |
| This study, FLNR | IUBC 5402 | 2      | Comox Lake         | 49.619   | -125.166  | BC          | 2009-07-31   | Scale    |             |                            |         |         |          |                                         | -28.2                      | n          | 1.9            | -26.3                              | 5.9                   | 45.8    | 16.9    | 3.17     | 1                       |                                  |       |
| This study, FLNR | IUBC 5403 | 3      | Comox Lake         | 49.619   | -125.166  | BC          | 2009-07-31   | Scale    |             |                            |         |         |          |                                         | -28.2                      | n          | 1.9            | -26.3                              | 5.9                   | 32.3    | 12.0    | 3.13     | 1                       |                                  |       |
| This study, FLNR | IUBC 5404 | 4      | Comox Lake         | 49.619   | -125.166  | BC          | 2009-07-31   | Scale    |             |                            |         |         |          |                                         | -28.2                      | n          | 1.9            | -26.3                              | 6.5                   | 46.1    | 16.9    | 3.18     | 1                       |                                  |       |
| This study, FLNR | IUBC 5405 | 5      | Comox Lake         | 49.619   | -125.166  | BC          | 2009-07-31   | Scale    |             |                            |         |         |          |                                         | -28.3                      | n          | 1.9            | -26.4                              | 5.9                   | 45.6    | 17.0    | 3.12     | 1                       |                                  |       |
| This study, FLNR | IUBC 5406 | 6      | Comox Lake         | 49.619   | -125.166  | BC          | 2009-07-31   | Scale    |             |                            |         |         |          |                                         | -28.4                      | n          | 1.9            | -26.5                              | 6.5                   | 45.5    | 16.9    | 3.14     | 1                       |                                  |       |
| This study, FLNR | IUBC 5407 | 7      | Comox Lake         | 49.619   | -125.166  | BC          | 2009-07-31   | Scale    |             |                            |         |         |          |                                         | -28.0                      | n          | 1.9            | -26.1                              | 6.2                   | 41.7    | 15.0    | 3.24     | 1                       |                                  |       |
| This study, FLNR | IUBC 5408 | 8      | Comox Lake         | 49.619   | -125.166  | BC          | 2009-07-31   | Scale    |             |                            |         |         |          |                                         | -28.1                      | n          | 1.9            | -26.2                              | 6.1                   | 42.1    | 15.1    | 3.26     | 1                       |                                  |       |
| This study, FLNR | IUBC 5409 | 9      | Comox Lake         | 49.619   | -125.166  | BC          | 2009-07-31   | Scale    |             |                            |         |         |          |                                         | -28.2                      | n          | 1.9            | -26.3                              | 5.8                   | 40.7    | 14.7    | 3.23     | 1                       |                                  |       |
| This study, FLNR | IUBC 5410 | 10     | Comox Lake         | 49.619   | -125.166  | BC          | 2009-07-31   | Scale    |             |                            |         |         |          |                                         | -27.2                      | n          | 1.9            | -25.3                              | 6.3                   | 41.8    | 15.1    | 3.24     | 1                       |                                  |       |
| This study, FLNR | IUBC 5411 | 11     | Comox Lake         | 49.619   | -125.166  | BC          | 2009-07-31   | Scale    |             |                            |         |         |          |                                         | -28.2                      | n          | 1.9            | -26.3                              | 6.5                   | 42.0    | 15.1    | 3.24     | 1                       |                                  |       |
| This study, FLNR | IUBC 5412 | 13     | Comox Lake         | 49.619   | -125.166  | BC          | 2009-07-31   | Scale    |             |                            |         |         |          |                                         | -28.6                      | n          | 1.9            | -26.7                              | 6.7                   | 41.9    | 15.2    | 3.22     | 1                       |                                  |       |
| This study, FLNR | IUBC 5413 | 15     | Comox Lake         | 49.619   | -125.166  | BC          | 2009-07-31   | Scale    |             |                            |         |         |          |                                         | -28.2                      | n          | 1.9            | -26.3                              | 5.8                   | 42.2    | 15.1    | 3.25     | 1                       |                                  |       |
| This study, FLNR | IUBC 5414 | 16     | Comox Lake         | 49.619   | -125.166  | BC          | 2009-07-31   | Scale    |             |                            |         |         |          |                                         | -28.0                      | n          | 1.9            | -26.1                              | 6.4                   | 42.3    | 15.2    | 3.24     | 1                       |                                  |       |
| This study, FLNR | IUBC 5415 | 17     | Comox Lake         | 49.619   | -125.166  | BC          | 2009-07-31   | Scale    |             |                            |         |         |          |                                         | -28.2                      | n          | 1.9            | -26.3                              | 6.5                   | 42.3    | 15.2    | 3.25     | 1                       |                                  |       |
| This study, FLNR | IUBC 5417 | 25     | Comox Lake         | 49.619   | -125.166  | BC          | 2009-07-31   | Scale    |             |                            |         |         |          |                                         | -28.2                      | n          | 1.9            | -26.3                              | 6.1                   | 43.3    | 15.6    | 3.24     | 1                       |                                  |       |

| Source/Donor     | Lab No.   | Cat No                | Site Name       | Latitude | Longitude | Prov. State | Capture Date | Material | Col. Yld. % | Mus. $\delta^{13}\text{C}$ | Mus. %C | Mus. %N | Mus. C:N | Mus. $\delta^{13}\text{C}$ , lipid cor. | Col. $\delta^{13}\text{C}$ | Form. cor. | Suess cor. (‰) | $\delta^{13}\text{C}_{\text{cor}}$ | $\delta^{15}\text{N}$ | Col. %C | Col. %N | Col. C:N | A priori ecotype | $\delta^{13}\text{C}$ ecotype ID | Notes            |
|------------------|-----------|-----------------------|-----------------|----------|-----------|-------------|--------------|----------|-------------|----------------------------|---------|---------|----------|-----------------------------------------|----------------------------|------------|----------------|------------------------------------|-----------------------|---------|---------|----------|------------------|----------------------------------|------------------|
| This study, FLNR | IUBC 5418 | 26                    | Comox Lake      | 49.619   | -125.166  | BC          | 2009-07-31   | Scale    |             |                            |         |         |          |                                         | -28.0                      | n          | 1.9            | -26.1                              | 6.1                   | 42.9    | 15.6    | 3.21     | 1                |                                  |                  |
| This study, FLNR | IUBC 5419 | 33                    | Comox Lake      | 49.619   | -125.166  | BC          | 2009-07-31   | Scale    |             |                            |         |         |          |                                         | -28.2                      | n          | 1.9            | -26.3                              | 5.9                   | 41.0    | 14.6    | 3.27     | 1                |                                  |                  |
| This study, FLNR | IUBC 5420 | 36                    | Comox Lake      | 49.619   | -125.166  | BC          | 2009-07-31   | Scale    |             |                            |         |         |          |                                         | -28.2                      | n          | 1.9            | -26.3                              | 6.2                   | 42.2    | 14.8    | 3.32     | 1                |                                  |                  |
| This study, FLNR | IUBC 5421 | 37                    | Comox Lake      | 49.619   | -125.166  | BC          | 2009-07-31   | Scale    |             |                            |         |         |          |                                         | -28.3                      | n          | 1.9            | -26.4                              | 6.1                   | 30.9    | 11.0    | 3.28     | 1                |                                  |                  |
| This study, FLNR | IUBC 5343 | 56478                 | Cowichan Lake   | 48.883   | -124.299  | BC          | 2010-07-07   | Scale    |             |                            |         |         |          |                                         | -27.1                      | n          | 1.9            | -25.2                              | 7.0                   | 43.8    | 15.3    | 3.34     | 1                |                                  |                  |
| This study, FLNR | IUBC 5345 | 56480                 | Cowichan Lake   | 48.883   | -124.299  | BC          | 2010-07-07   | Scale    |             |                            |         |         |          |                                         | -27.7                      | n          | 1.9            | -25.8                              | 6.6                   | 43.1    | 15.3    | 3.29     | 1                |                                  |                  |
| This study, FLNR | IUBC 5346 | 56482                 | Cowichan Lake   | 48.883   | -124.299  | BC          | 2010-07-07   | Scale    |             |                            |         |         |          |                                         | -27.7                      | n          | 1.9            | -25.7                              | 7.1                   | 39.2    | 14.1    | 3.24     | 1                |                                  |                  |
| This study, FLNR | IUBC 5347 | 56483                 | Cowichan Lake   | 48.883   | -124.299  | BC          | 2010-07-07   | Scale    |             |                            |         |         |          |                                         | -27.4                      | n          | 1.9            | -25.4                              | 6.8                   | 42.1    | 15.3    | 3.20     | 1                |                                  |                  |
| This study, FLNR | IUBC 5349 | 56485                 | Cowichan Lake   | 48.883   | -124.299  | BC          | 2010-07-07   | Scale    |             |                            |         |         |          |                                         | -27.6                      | n          | 1.9            | -25.7                              | 7.0                   | 42.2    | 15.4    | 3.20     | 1                |                                  |                  |
| This study, FLNR | IUBC 5350 | 56486                 | Cowichan Lake   | 48.883   | -124.299  | BC          | 2010-07-07   | Scale    |             |                            |         |         |          |                                         | -27.4                      | n          | 1.9            | -25.5                              | 6.6                   | 39.5    | 14.3    | 3.22     | 1                |                                  |                  |
| This study, FLNR | IUBC 5352 | 56488                 | Cowichan Lake   | 48.883   | -124.299  | BC          | 2010-07-07   | Scale    |             |                            |         |         |          |                                         | -26.5                      | n          | 1.9            | -24.6                              | 7.0                   | 40.6    | 14.9    | 3.16     | 1                |                                  |                  |
| This study, FLNR | IUBC 5353 | 56489                 | Cowichan Lake   | 48.883   | -124.299  | BC          | 2010-07-07   | Scale    |             |                            |         |         |          |                                         | -24.9                      | n          | 1.9            | -22.9                              | 6.9                   | 42.8    | 15.2    | 3.28     | 1                |                                  |                  |
| This study, FLNR | IUBC 5354 | 56817                 | Cowichan Lake   | 48.883   | -124.299  | BC          | 2010-07-07   | Scale    |             |                            |         |         |          |                                         | -27.7                      | n          | 1.9            | -25.8                              | 7.3                   | 42.1    | 15.5    | 3.18     | 1                |                                  |                  |
| This study, ROM  | IUBC 4100 | 014205                | Cultus Lake     | 49.053   | -121.986  | BC          | 1930-00-00   | Scale    |             |                            |         |         |          |                                         | -30.0                      | y          | 0.2            | -29.3                              | 11.2                  | 42.0    | 13.0    | 3.78     | 1                |                                  | C:N unacceptable |
| This study, ROM  | IUBC 4101 | 014205                | Cultus Lake     | 49.053   | -121.986  | BC          | 1930-00-00   | Scale    |             |                            |         |         |          |                                         | -31.4                      | y          | 0.2            | -30.7                              | 8.9                   | 41.6    | 12.7    | 3.82     | 1                |                                  | C:N unacceptable |
| This study, ROM  | IUBC 4102 | 014205                | Cultus Lake     | 49.053   | -121.986  | BC          | 1930-00-00   | Scale    |             |                            |         |         |          |                                         | -31.5                      | y          | 0.2            | -30.8                              | 8.8                   | 41.5    | 13.1    | 3.70     | 1                |                                  | C:N unacceptable |
| This study, ROM  | IUBC 4103 | 014205                | Cultus Lake     | 49.053   | -121.986  | BC          | 1930-00-00   | Scale    |             |                            |         |         |          |                                         | -31.5                      | y          | 0.2            | -30.7                              | 8.7                   | 42.0    | 12.8    | 3.84     | 1                |                                  | C:N unacceptable |
| This study, ROM  | IUBC 4094 | 010665                | Driftwood River | 55.872   | -126.485  | BC          | 1938-08-00   | Scale    |             |                            |         |         |          |                                         | -27.8                      | y          | 0.3            | -27.0                              | 7.9                   | 42.2    | 14.2    | 3.48     | 1                |                                  |                  |
| This study, ROM  | IUBC 4095 | 010666                | Driftwood River | 55.872   | -126.485  | BC          | 1938-08-16   | Scale    |             |                            |         |         |          |                                         | -28.0                      | y          | 0.3            | -27.2                              | 9.0                   | 41.9    | 13.9    | 3.50     | 1                |                                  |                  |
| This study, ROM  | IUBC 4096 | 010667                | Driftwood River | 55.872   | -126.485  | BC          | 1938-08-16   | Scale    |             |                            |         |         |          |                                         | -28.1                      | y          | 0.3            | -27.3                              | 8.6                   | 41.5    | 14.1    | 3.44     | 1                |                                  |                  |
| This study, BBM  | IUBC 4379 | 11-0348               | Easter Lake     | Unknown  | Unknown   | NWT         | 1972-09-11   | Scale    |             |                            |         |         |          |                                         | -25.5                      | y          | 0.8            | -24.2                              | 8.9                   | 42.3    | 14.0    | 3.54     | 1                |                                  |                  |
| This study, BBM  | IUBC 4374 | 11-0142               | Eutsuk Lake     | 53.245   | -126.516  | BC          | 1998-09-16   | Scale    |             |                            |         |         |          |                                         | -26.2                      | y          | 1.5            | -24.3                              | 7.1                   | 42.2    | 14.5    | 3.41     | 1                |                                  |                  |
| This study, BBM  | IUBC 4375 | 11-0142               | Eutsuk Lake     | 53.245   | -126.516  | BC          | 1998-09-16   | Scale    |             |                            |         |         |          |                                         | -25.8                      | y          | 1.5            | -23.8                              | 6.7                   | 39.6    | 13.6    | 3.39     | 1                |                                  |                  |
| This study, BBM  | IUBC 4376 | 11-0142               | Eutsuk Lake     | 53.245   | -126.516  | BC          | 1998-09-16   | Scale    |             |                            |         |         |          |                                         | -26.0                      | y          | 1.5            | -24.1                              | 6.6                   | 42.1    | 14.6    | 3.35     | 1                |                                  |                  |
| This study, BBM  | IUBC 4378 | 11-0142               | Eutsuk Lake     | 53.245   | -126.516  | BC          | 1998-09-16   | Scale    |             |                            |         |         |          |                                         | -26.5                      | y          | 1.5            | -24.5                              | 7.5                   | 40.6    | 13.6    | 3.47     | 1                |                                  |                  |
| This study, FLNR | IUBC 5275 | K-1                   | Kalamalka Lake  | 50.174   | -119.331  | BC          | 2004-09-08   | Scale    |             |                            |         |         |          |                                         | -25.1                      | n          | 1.7            | -23.5                              | 12.4                  | 41.6    | 15.1    | 3.21     | 1                |                                  |                  |
| This study, FLNR | IUBC 5279 | K-5                   | Kalamalka Lake  | 50.174   | -119.331  | BC          | 2004-09-08   | Scale    |             |                            |         |         |          |                                         | -25.0                      | n          | 1.7            | -23.3                              | 12.4                  | 42.1    | 15.5    | 3.17     | 1                |                                  |                  |
| This study, FLNR | IUBC 5280 | K-6                   | Kalamalka Lake  | 50.174   | -119.331  | BC          | 2004-09-08   | Scale    |             |                            |         |         |          |                                         | -25.2                      | n          | 1.7            | -23.5                              | 12.9                  | 42.0    | 15.3    | 3.19     | 1                |                                  |                  |
| This study, FLNR | IUBC 5281 | K-7                   | Kalamalka Lake  | 50.174   | -119.331  | BC          | 2004-09-08   | Scale    |             |                            |         |         |          |                                         | -25.4                      | n          | 1.7            | -23.7                              | 12.5                  | 42.2    | 15.7    | 3.13     | 1                |                                  |                  |
| This study, FLNR | IUBC 5282 | K-8                   | Kalamalka Lake  | 50.174   | -119.331  | BC          | 2004-09-08   | Scale    |             |                            |         |         |          |                                         | -25.3                      | n          | 1.7            | -23.6                              | 12.1                  | 42.7    | 15.2    | 3.27     | 1                |                                  |                  |
| This study, FLNR | IUBC 5283 | K-9                   | Kalamalka Lake  | 50.174   | -119.331  | BC          | 2004-09-08   | Scale    |             |                            |         |         |          |                                         | -25.2                      | n          | 1.7            | -23.5                              | 11.9                  | 39.4    | 14.6    | 3.14     | 1                |                                  |                  |
| This study, FLNR | IUBC 5371 | 10                    | Kinbasket Lake  | 52.156   | -118.453  | BC          | 2014-07-26   | Scale    |             |                            |         |         |          |                                         | -26.0                      | n          | 2.1            | -23.8                              | 6.6                   | 42.1    | 15.5    | 3.16     | 1                |                                  |                  |
| This study, FLNR | IUBC 5372 | 11                    | Kinbasket Lake  | 52.156   | -118.453  | BC          | 2014-07-26   | Scale    |             |                            |         |         |          |                                         | -25.5                      | n          | 2.1            | -23.3                              | 5.8                   | 42.0    | 15.6    | 3.14     | 1                |                                  |                  |
| This study, FLNR | IUBC 5373 | 12                    | Kinbasket Lake  | 52.156   | -118.453  | BC          | 2014-07-26   | Scale    |             |                            |         |         |          |                                         | -26.3                      | n          | 2.1            | -24.2                              | 5.6                   | 42.0    | 15.5    | 3.16     | 1                |                                  |                  |
| This study, FLNR | IUBC 5374 | 14                    | Kinbasket Lake  | 52.156   | -118.453  | BC          | 2014-07-26   | Scale    |             |                            |         |         |          |                                         | -25.9                      | n          | 2.1            | -23.8                              | 6.6                   | 41.9    | 15.4    | 3.17     | 1                |                                  |                  |
| This study, FLNR | IUBC 5375 | 26                    | Kinbasket Lake  | 52.156   | -118.453  | BC          | 2014-07-26   | Scale    |             |                            |         |         |          |                                         | -25.6                      | n          | 2.1            | -23.5                              | 5.6                   | 42.9    | 15.6    | 3.20     | 1                |                                  |                  |
| This study, FLNR | IUBC 5376 | 40                    | Kinbasket Lake  | 52.156   | -118.453  | BC          | 2014-07-26   | Scale    |             |                            |         |         |          |                                         | -26.0                      | n          | 2.1            | -23.8                              | 5.6                   | 42.6    | 15.6    | 3.18     | 1                |                                  |                  |
| This study, FLNR | IUBC 5377 | 42                    | Kinbasket Lake  | 52.156   | -118.453  | BC          | 2014-07-26   | Scale    |             |                            |         |         |          |                                         | -26.4                      | n          | 2.1            | -24.3                              | 6.9                   | 42.8    | 15.7    | 3.18     | 1                |                                  |                  |
| This study, FLNR | IUBC 5378 | 59                    | Kinbasket Lake  | 52.156   | -118.453  | BC          | 2014-07-26   | Scale    |             |                            |         |         |          |                                         | -26.1                      | n          | 2.1            | -24.0                              | 7.3                   | 42.4    | 15.7    | 3.14     | 1                |                                  |                  |
| This study, FLNR | IUBC 5379 | 60                    | Kinbasket Lake  | 52.156   | -118.453  | BC          | 2014-07-27   | Scale    |             |                            |         |         |          |                                         | -26.1                      | n          | 2.1            | -24.0                              | 6.3                   | 42.6    | 15.6    | 3.20     | 1                |                                  |                  |
| This study, FLNR | IUBC 5380 | 62                    | Kinbasket Lake  | 52.156   | -118.453  | BC          | 2014-07-27   | Scale    |             |                            |         |         |          |                                         | -26.5                      | n          | 2.1            | -24.4                              | 6.8                   | 41.6    | 15.4    | 3.15     | 1                |                                  |                  |
| This study, FLNR | IUBC 5381 | 63                    | Kinbasket Lake  | 52.156   | -118.453  | BC          | 2014-07-27   | Scale    |             |                            |         |         |          |                                         | -26.5                      | n          | 2.1            | -24.4                              | 6.7                   | 41.8    | 15.2    | 3.20     | 1                |                                  |                  |
| This study, FLNR | IUBC 5382 | 64                    | Kinbasket Lake  | 52.156   | -118.453  | BC          | 2014-07-27   | Scale    |             |                            |         |         |          |                                         | -26.5                      | n          | 2.1            | -24.4                              | 6.7                   | 42.7    | 15.7    | 3.17     | 1                |                                  |                  |
| This study, FLNR | IUBC 5383 | 65                    | Kinbasket Lake  | 52.156   | -118.453  | BC          | 2014-07-27   | Scale    |             |                            |         |         |          |                                         | -26.1                      | n          | 2.1            | -24.0                              | 6.6                   | 42.2    | 15.6    | 3.16     | 1                |                                  |                  |
| This study, FLNR | IUBC 5384 | 78                    | Kinbasket Lake  | 52.156   | -118.453  | BC          | 2014-07-27   | Scale    |             |                            |         |         |          |                                         | -26.2                      | n          | 2.1            | -24.1                              | 7.3                   | 42.4    | 15.4    | 3.21     | 1                |                                  |                  |
| This study, FLNR | IUBC 5385 | 83                    | Kinbasket Lake  | 52.156   | -118.453  | BC          | 2014-07-27   | Scale    |             |                            |         |         |          |                                         | -26.4                      | n          | 2.1            | -24.3                              | 6.6                   | 42.5    | 15.5    | 3.20     | 1                |                                  |                  |
| This study, RBCM | IUBC 3893 | 942-017-001, 00284, S | Lac la Hache    | 51.833   | -121.517  | BC          | 1942-10-04   | Scale    |             |                            |         |         |          |                                         | -23.8                      | y          | 0.3            | -22.9                              | 12.4                  | 41.1    | 14.5    | 3.32     | 1                |                                  |                  |
| This study, RBCM | IUBC 3894 | 942-017-001, 00284, S | Lac la Hache    | 51.833   | -121.517  | BC          | 1942-10-04   | Scale    |             |                            |         |         |          |                                         | -23.8                      | y          | 0.3            | -22.9                              | 12.7                  | 41.7    | 14.3    | 3.40     | 1                |                                  |                  |
| This study, RBCM | IUBC 3895 | 942-017-001, 00284, S | Lac la Hache    | 51.833   | -121.517  | BC          | 1942-10-04   | Scale    |             |                            |         |         |          |                                         | -23.7                      | y          | 0.3            | -22.9                              | 12.1                  | 41.5    | 14.7    | 3.29     | 1                |                                  |                  |
| This study, RBCM | IUBC 3896 | 942-017-001, 00284, S | Lac la Hache    | 51.833   | -121.517  | BC          | 1942-10-04   | Scale    |             |                            |         |         |          |                                         | -23.9                      | y          | 0.3            | -23.1                              | 12.6                  | 42.3    | 14.6    | 3.38     | 1                |                                  |                  |



| Source/Donor     | Lab No.   | Cat No                | Site Name           | Latitude | Longitude | Prov. State | Capture Date | Material       | Col. Yld. % | Mus. $\delta^{13}\text{C}$ | Mus. %C | Mus. %N | Mus. C:N | Mus. $\delta^{13}\text{C}$ , lipid cor. | Col. $\delta^{13}\text{C}$ | Form. cor. | Suess cor. (‰) | $\delta^{13}\text{C}_{\text{cor}}$ | $\delta^{15}\text{N}$ | Col. %C | Col. %N | Col. C:N | <i>A priori</i> ecotype | $\delta^{13}\text{C}$ ecotype ID | Notes |
|------------------|-----------|-----------------------|---------------------|----------|-----------|-------------|--------------|----------------|-------------|----------------------------|---------|---------|----------|-----------------------------------------|----------------------------|------------|----------------|------------------------------------|-----------------------|---------|---------|----------|-------------------------|----------------------------------|-------|
| This study, BBM  | IUBC 4366 | 55-19                 | Lower Arrow Lake    | 49.780   | -118.800  | BC          | 1949-08-16   | Scale          |             |                            |         |         |          |                                         | -26.3                      | y          | 0.4            | -25.4                              | 7.2                   | 42.3    | 14.0    | 3.52     | 1                       |                                  |       |
| This study, RBCM | IUBC 3891 | 988-00023-002, fish 1 | Lucas Lake          | 53.583   | -125.167  | BC          | 1989-01-24   | Scale          |             |                            |         |         |          |                                         | -26.2                      | y          | 1.2            | -24.5                              | 10.8                  | 41.5    | 14.8    | 3.26     | 1                       |                                  |       |
| This study, RBCM | IUBC 3892 | 988-00023-002, fish 2 | Lucas Lake          | 53.583   | -125.167  | BC          | 1989-01-24   | Scale          |             |                            |         |         |          |                                         | -26.7                      | y          | 1.2            | -25.0                              | 10.7                  | 41.6    | 14.5    | 3.33     | 1                       |                                  |       |
| This study, ROM  | IUBC 4065 | 006135                | McRae Creek         | 49.104   | -118.234  | BC          | 1928-06-26   | Scale          |             |                            |         |         |          |                                         | -27.9                      | y          | 0.2            | -27.1                              | 7.7                   | 44.2    | 14.3    | 3.61     | 1                       |                                  |       |
| This study, FLNR | TEAL 1723 | 3                     | Middle Vernon Creek | 50.048   | -119.406  | BC          | 2018-10-13   | Bone, vertebra | 20.2        |                            |         |         |          |                                         | -26.2                      | n          | 2.3            | -23.9                              | 14.5                  | 45.9    | 17.2    | 3.11     | 1                       |                                  |       |
| This study, FLNR | TEAL 1724 | 6                     | Middle Vernon Creek | 50.048   | -119.406  | BC          | 2018-10-13   | Bone, vertebra | 22.0        |                            |         |         |          |                                         | -27.3                      | n          | 2.3            | -25.0                              | 14.4                  | 47.2    | 17.3    | 3.19     | 1                       |                                  |       |
| This study, FLNR | TEAL 1725 | 7                     | Middle Vernon Creek | 50.048   | -119.406  | BC          | 2018-10-13   | Bone, vertebra | 20.6        |                            |         |         |          |                                         | -27.1                      | n          | 2.3            | -24.8                              | 14.5                  | 46.7    | 17.2    | 3.16     | 1                       |                                  |       |
| This study, FLNR | TEAL 1726 | 13                    | Middle Vernon Creek | 50.048   | -119.406  | BC          | 2018-10-13   | Bone, vertebra | 23.3        |                            |         |         |          |                                         | -26.5                      | n          | 2.3            | -24.2                              | 14.6                  | 46.9    | 17.0    | 3.22     | 1                       |                                  |       |
| This study, FLNR | TEAL 1727 | 18                    | Middle Vernon Creek | 50.048   | -119.406  | BC          | 2018-10-13   | Bone, vertebra | 23.4        |                            |         |         |          |                                         | -26.5                      | n          | 2.3            | -24.2                              | 14.5                  | 46.8    | 17.1    | 3.19     | 1                       |                                  |       |
| This study, FLNR | TEAL 1728 | 19                    | Middle Vernon Creek | 50.048   | -119.406  | BC          | 2018-10-13   | Bone, vertebra | 20.4        |                            |         |         |          |                                         | -26.5                      | n          | 2.3            | -24.2                              | 14.3                  | 46.4    | 17.0    | 3.19     | 1                       |                                  |       |
| This study, FLNR | TEAL 1729 | 22                    | Middle Vernon Creek | 50.048   | -119.406  | BC          | 2018-10-13   | Bone, vertebra | 21.6        |                            |         |         |          |                                         | -26.7                      | n          | 2.3            | -24.4                              | 14.4                  | 47.2    | 17.6    | 3.13     | 1                       |                                  |       |
| This study, FLNR | TEAL 1730 | 28                    | Middle Vernon Creek | 50.048   | -119.406  | BC          | 2018-10-13   | Bone, vertebra | 22.2        |                            |         |         |          |                                         | -27.5                      | n          | 2.3            | -25.2                              | 15.3                  | 47.5    | 17.3    | 3.21     | 1                       |                                  |       |
| This study, FLNR | TEAL 1731 | 33                    | Middle Vernon Creek | 50.048   | -119.406  | BC          | 2018-10-13   | Bone, vertebra | 22.9        |                            |         |         |          |                                         | -27.2                      | n          | 2.3            | -24.9                              | 14.6                  | 47.7    | 17.4    | 3.21     | 1                       |                                  |       |
| This study, FLNR | TEAL 1732 | 40                    | Middle Vernon Creek | 50.048   | -119.406  | BC          | 2018-10-16   | Bone, vertebra | 22.9        |                            |         |         |          |                                         | -26.9                      | n          | 2.3            | -24.6                              | 14.3                  | 47.7    | 17.5    | 3.18     | 1                       |                                  |       |
| This study, FLNR | TEAL 1733 | 43                    | Middle Vernon Creek | 50.048   | -119.406  | BC          | 2018-10-16   | Bone, vertebra | 21.6        |                            |         |         |          |                                         | -27.0                      | n          | 2.3            | -24.6                              | 14.6                  | 47.1    | 17.4    | 3.16     | 1                       |                                  |       |
| This study, FLNR | TEAL 1734 | 54                    | Middle Vernon Creek | 50.048   | -119.406  | BC          | 2018-10-16   | Bone, vertebra | 20.5        |                            |         |         |          |                                         | -27.1                      | n          | 2.3            | -24.8                              | 14.2                  | 46.6    | 17.6    | 3.09     | 1                       |                                  |       |
| This study, FLNR | TEAL 1735 | 56                    | Middle Vernon Creek | 50.048   | -119.406  | BC          | 2018-10-16   | Bone, vertebra | 21.3        |                            |         |         |          |                                         | -27.2                      | n          | 2.3            | -24.9                              | 14.8                  | 46.8    | 17.4    | 3.13     | 1                       |                                  |       |
| This study, FLNR | TEAL 1736 | 62                    | Middle Vernon Creek | 50.048   | -119.406  | BC          | 2018-10-16   | Bone, vertebra | 22.1        |                            |         |         |          |                                         | -26.9                      | n          | 2.3            | -24.5                              | 14.6                  | 47.3    | 17.2    | 3.21     | 1                       |                                  |       |
| This study, FLNR | TEAL 1737 | 70                    | Middle Vernon Creek | 50.048   | -119.406  | BC          | 2018-10-16   | Bone, vertebra | 21.2        |                            |         |         |          |                                         | -27.1                      | n          | 2.3            | -24.8                              | 14.2                  | 47.3    | 17.3    | 3.18     | 1                       |                                  |       |
| This study, FLNR | TEAL 1738 | 71                    | Middle Vernon Creek | 50.048   | -119.406  | BC          | 2018-10-16   | Bone, vertebra | 23.5        |                            |         |         |          |                                         | -27.3                      | n          | 2.3            | -25.0                              | 15.2                  | 47.7    | 17.3    | 3.21     | 1                       |                                  |       |
| This study, ROM  | IUBC 4069 | 006092                | Nelson Warf         | 49.498   | -117.300  | BC          | 1928-06-19   | Scale          |             |                            |         |         |          |                                         | -26.4                      | y          | 0.2            | -25.7                              | 9.1                   | 42.8    | 13.9    | 3.60     | 1                       |                                  |       |
| This study, ROM  | IUBC 4070 | 006093                | Nelson Warf         | 49.498   | -117.300  | BC          | 1928-06-19   | Scale          |             |                            |         |         |          |                                         | -26.3                      | y          | 0.2            | -25.6                              | 9.6                   | 42.3    | 14.2    | 3.48     | 1                       |                                  |       |
| This study, ROM  | IUBC 4071 | 006094                | Nelson Warf         | 49.498   | -117.300  | BC          | 1928-06-19   | Scale          |             |                            |         |         |          |                                         | -26.3                      | y          | 0.2            | -25.6                              | 9.0                   | 42.9    | 14.2    | 3.53     | 1                       |                                  |       |
| This study, ROM  | IUBC 4072 | 006095                | Nelson Warf         | 49.498   | -117.300  | BC          | 1928-06-19   | Scale          |             |                            |         |         |          |                                         | -26.4                      | y          | 0.2            | -25.6                              | 8.7                   | 42.3    | 14.3    | 3.46     | 1                       |                                  |       |
| This study, ROM  | IUBC 4073 | 006096                | Nelson Warf         | 49.498   | -117.300  | BC          | 1928-06-19   | Scale          |             |                            |         |         |          |                                         | -26.5                      | y          | 0.2            | -25.8                              | 9.0                   | 43.0    | 13.8    | 3.62     | 1                       |                                  |       |
| This study, ROM  | IUBC 4074 | 006097                | Nelson Warf         | 49.498   | -117.300  | BC          | 1928-06-19   | Scale          |             |                            |         |         |          |                                         | -26.6                      | y          | 0.2            | -25.9                              | 9.0                   | 42.9    | 14.3    | 3.49     | 1                       |                                  |       |
| This study, ROM  | IUBC 4075 | 006098                | Nelson Warf         | 49.498   | -117.300  | BC          | 1928-06-19   | Scale          |             |                            |         |         |          |                                         | -26.3                      | y          | 0.2            | -25.5                              | 9.1                   | 42.9    | 14.5    | 3.44     | 1                       |                                  |       |
| This study, ROM  | IUBC 4076 | 006099                | Nelson Warf         | 49.498   | -117.300  | BC          | 1928-06-19   | Scale          |             |                            |         |         |          |                                         | -26.7                      | y          | 0.2            | -25.9                              | 9.5                   | 43.5    | 14.2    | 3.56     | 1                       |                                  |       |
| This study, FLNR | IUBC 5290 | 37871                 | Okanagan Lake       | 49.834   | -119.524  | BC          | 1998-09-15   | Scale          |             |                            |         |         |          |                                         | -24.5                      | n          | 1.5            | -23.0                              | 11.2                  | 42.4    | 15.4    | 3.20     | 1                       |                                  |       |
| This study, FLNR | IUBC 5291 | 37878                 | Okanagan Lake       | 49.834   | -119.524  | BC          | 1998-00-00   | Scale          |             |                            |         |         |          |                                         | -24.2                      | n          | 1.5            | -22.7                              | 11.6                  | 42.2    | 15.6    | 3.16     | 1                       |                                  |       |
| This study, FLNR | IUBC 5292 | 37894                 | Okanagan Lake       | 49.834   | -119.524  | BC          | 1998-00-00   | Scale          |             |                            |         |         |          |                                         | -24.7                      | n          | 1.5            | -23.3                              | 11.2                  | 42.8    | 15.4    | 3.25     | 1                       |                                  |       |
| This study, FLNR | IUBC 5293 | 37912                 | Okanagan Lake       | 49.834   | -119.524  | BC          | 1998-00-00   | Scale          |             |                            |         |         |          |                                         | -24.7                      | n          | 1.5            | -23.3                              | 10.9                  | 42.3    | 15.0    | 3.28     | 1                       |                                  |       |
| This study, FLNR | IUBC 5294 | 37913                 | Okanagan Lake       | 49.834   | -119.524  | BC          | 1998-00-00   | Scale          |             |                            |         |         |          |                                         | -24.6                      | n          | 1.5            | -23.1                              | 12.1                  | 42.3    | 15.6    | 3.16     | 1                       |                                  |       |
| This study, FLNR | IUBC 5295 | 37925                 | Okanagan Lake       | 49.834   | -119.524  | BC          | 1998-00-00   | Scale          |             |                            |         |         |          |                                         | -24.6                      | n          | 1.5            | -23.2                              | 11.7                  | 42.0    | 15.6    | 3.14     | 1                       |                                  |       |
| This study, FLNR | IUBC 5296 | NA                    | Okanagan Lake       | 49.834   | -119.524  | BC          | 1998-00-00   | Scale          |             |                            |         |         |          |                                         | -25.0                      | n          | 1.5            | -23.5                              | 11.7                  | 41.9    | 15.5    | 3.16     | 1                       |                                  |       |
| This study, FLNR | IUBC 5297 | 37927                 | Okanagan Lake       | 49.834   | -119.524  | BC          | 1998-00-00   | Scale          |             |                            |         |         |          |                                         | -24.9                      | n          | 1.5            | -23.5                              | 11.7                  | 42.2    | 15.3    | 3.22     | 1                       |                                  |       |
| This study, FLNR | IUBC 5298 | 37928                 | Okanagan Lake       | 49.834   | -119.524  | BC          | 1998-00-00   | Scale          |             |                            |         |         |          |                                         | -24.9                      | n          | 1.5            | -23.4                              | 11.9                  | 42.2    | 15.6    | 3.16     | 1                       |                                  |       |
| This study, FLNR | IUBC 5299 | 37949                 | Okanagan Lake       | 49.834   | -119.524  | BC          | 1998-00-00   | Scale          |             |                            |         |         |          |                                         | -24.5                      | n          | 1.5            | -23.0                              | 10.7                  | 42.3    | 15.6    | 3.17     | 1                       |                                  |       |
| This study, FLNR | IUBC 5300 | 37950                 | Okanagan Lake       | 49.834   | -119.524  | BC          | 1998-00-00   | Scale          |             |                            |         |         |          |                                         | -24.6                      | n          | 1.5            | -23.2                              | 11.5                  | 41.8    | 15.5    | 3.15     | 1                       |                                  |       |
| This study, FLNR | IUBC 5301 | 37951                 | Okanagan Lake       | 49.834   | -119.524  | BC          | 1998-00-00   | Scale          |             |                            |         |         |          |                                         | -24.9                      | n          | 1.5            | -23.5                              | 12.2                  | 42.3    | 15.5    | 3.18     | 1                       |                                  |       |
| This study, FLNR | IUBC 5302 | 37973                 | Okanagan Lake       | 49.834   | -119.524  | BC          | 1998-00-00   | Scale          |             |                            |         |         |          |                                         | -24.7                      | n          | 1.5            | -23.2                              | 11.3                  | 41.8    | 15.5    | 3.15     | 1                       |                                  |       |
| This study, FLNR | IUBC 5303 | 38060                 | Okanagan Lake       | 49.834   | -119.524  | BC          | 1998-00-00   | Scale          |             |                            |         |         |          |                                         | -24.1                      | n          | 1.5            | -22.7                              | 10.9                  | 42.1    | 15.5    | 3.17     | 1                       |                                  |       |
| This study, FLNR | IUBC 5304 | 38076                 | Okanagan Lake       | 49.834   | -119.524  | BC          | 1998-00-00   | Scale          |             |                            |         |         |          |                                         | -24.1                      | n          | 1.5            | -22.7                              | 11.4                  | 42.0    | 15.5    | 3.16     | 1                       |                                  |       |
| This study, FLNR | IUBC 5422 | 1                     | Okanagan Lake       | 49.834   | -119.524  | BC          | 2011-08-31   | Scale          |             |                            |         |         |          |                                         | -24.7                      | n          | 2.0            | -22.8                              | 12.7                  | 42.9    | 15.4    | 3.25     | 1                       |                                  |       |
| This study, FLNR | IUBC 5423 | 2                     | Okanagan Lake       | 49.834   | -119.524  | BC          | 2011-08-31   | Scale          |             |                            |         |         |          |                                         | -24.3                      | n          | 2.0            | -22.3                              | 11.7                  | 43.2    | 15.4    | 3.27     | 1                       |                                  |       |
| This study, FLNR | IUBC 5424 | 3                     | Okanagan Lake       | 49.834   | -119.524  | BC          | 2011-08-31   | Scale          |             |                            |         |         |          |                                         | -25.4                      | n          | 2.0            | -23.4                              | 11.5                  | 37.6    | 13.2    | 3.31     | 1                       |                                  |       |
| This study, FLNR | IUBC 5425 | 4                     | Okanagan Lake       | 49.834   | -119.524  | BC          | 2011-08-31   | Scale          |             |                            |         |         |          |                                         | -25.0                      | n          | 2.0            | -23.0                              | 11.7                  | 45.5    | 16.6    | 3.19     | 1                       |                                  |       |
| This study, FLNR | IUBC 5426 | 5                     | Okanagan Lake       | 49.834   | -119.524  | BC          | 2011-08-31   | Scale          |             |                            |         |         |          |                                         | -25.3                      | n          | 2.0            | -23.3                              | 12.1                  | 45.5    | 16.6    | 3.20     | 1                       |                                  |       |
| This study, FLNR | IUBC 5427 | 6                     | Okanagan Lake       | 49.834   | -119.524  | BC          | 2011-08-31   | Scale          |             |                            |         |         |          |                                         | -25.5                      | n          | 2.0            | -23.5                              | 11.6                  | 45.4    | 16.2    | 3.26     | 1                       |                                  |       |
| This study, FLNR | IUBC 5428 | 7                     | Okanagan Lake       | 49.834   | -119.524  | BC          | 2011-08-31   | Scale          |             |                            |         |         |          |                                         | -25.5                      | n          | 2.0            | -23.5                              | 11.8                  | 44.8    | 16.2    | 3.22     | 1                       |                                  |       |

| Source/Donor     | Lab No.   | Cat No               | Site Name       | Latitude | Longitude | Prov. State | Capture Date | Material | Col. Yld. % | Mus. $\delta^{13}\text{C}$ | Mus. %C | Mus. %N | Mus. C:N | Mus. $\delta^{13}\text{C}$ , lipid cor. | Col. $\delta^{13}\text{C}$ | Form. cor. | Suess cor. (‰) | $\delta^{13}\text{C}_{\text{cor}}$ | $\delta^{15}\text{N}$ | Col. %C | Col. %N | Col. C:N | <i>A priori</i> ecotype | $\delta^{13}\text{C}$ ecotype ID | Notes            |
|------------------|-----------|----------------------|-----------------|----------|-----------|-------------|--------------|----------|-------------|----------------------------|---------|---------|----------|-----------------------------------------|----------------------------|------------|----------------|------------------------------------|-----------------------|---------|---------|----------|-------------------------|----------------------------------|------------------|
| This study, FLNR | IUBC 5429 | 8                    | Okanagan Lake   | 49.834   | -119.524  | BC          | 2011-08-31   | Scale    |             |                            |         |         |          |                                         | -25.2                      | n          | 2.0            | -23.2                              | 11.8                  | 45.0    | 16.4    | 3.19     | 1                       |                                  |                  |
| This study, FLNR | IUBC 5430 | 9                    | Okanagan Lake   | 49.834   | -119.524  | BC          | 2011-08-31   | Scale    |             |                            |         |         |          |                                         | -25.5                      | n          | 2.0            | -23.5                              | 11.7                  | 45.2    | 16.6    | 3.17     | 1                       |                                  |                  |
| This study, FLNR | IUBC 5431 | 10                   | Okanagan Lake   | 49.834   | -119.524  | BC          | 2011-08-31   | Scale    |             |                            |         |         |          |                                         | -25.4                      | n          | 2.0            | -23.5                              | 11.8                  | 44.9    | 16.7    | 3.13     | 1                       |                                  |                  |
| This study, BBM  | IUBC 4363 | 55-0139              | Pothole Lake    | 49.930   | -120.280  | BC          | 1955-07-07   | Scale    |             |                            |         |         |          |                                         | -33.2                      | y          | 0.5            | -32.2                              | 8.7                   | 42.9    | 13.4    | 3.74     | 1                       |                                  | C:N unacceptable |
| This study, BBM  | IUBC 4364 | 55-0139              | Pothole Lake    | 49.930   | -120.280  | BC          | 1955-07-07   | Scale    |             |                            |         |         |          |                                         | -33.5                      | y          | 0.5            | -32.5                              | 8.2                   | 42.6    | 13.5    | 3.67     | 1                       |                                  | C:N unacceptable |
| This study, BBM  | IUBC 4365 | 55-0139              | Pothole Lake    | 49.930   | -120.280  | BC          | 1955-07-07   | Scale    |             |                            |         |         |          |                                         | -29.3                      | y          | 0.5            | -28.3                              | 9.4                   | 42.7    | 14.1    | 3.53     | 1                       |                                  |                  |
| This study, FLNR | IUBC 5386 | 1                    | Revelstoke Lake | 51.149   | -118.202  | BC          | 2014-07-28   | Scale    |             |                            |         |         |          |                                         | -27.2                      | n          | 2.1            | -25.1                              | 6.3                   | 42.4    | 15.5    | 3.20     | 1                       |                                  |                  |
| This study, FLNR | IUBC 5387 | 3                    | Revelstoke Lake | 51.149   | -118.202  | BC          | 2014-07-28   | Scale    |             |                            |         |         |          |                                         | -26.9                      | n          | 2.1            | -24.8                              | 6.2                   | 42.3    | 15.6    | 3.16     | 1                       |                                  |                  |
| This study, FLNR | IUBC 5388 | 5                    | Revelstoke Lake | 51.149   | -118.202  | BC          | 2014-07-28   | Scale    |             |                            |         |         |          |                                         | -26.8                      | n          | 2.1            | -24.7                              | 5.7                   | 42.2    | 15.6    | 3.15     | 1                       |                                  |                  |
| This study, FLNR | IUBC 5389 | 16                   | Revelstoke Lake | 51.149   | -118.202  | BC          | 2014-07-28   | Scale    |             |                            |         |         |          |                                         | -26.7                      | n          | 2.1            | -24.6                              | 6.0                   | 42.1    | 15.5    | 3.16     | 1                       |                                  |                  |
| This study, FLNR | IUBC 5390 | 18                   | Revelstoke Lake | 51.149   | -118.202  | BC          | 2014-07-28   | Scale    |             |                            |         |         |          |                                         | -26.8                      | n          | 2.1            | -24.7                              | 6.2                   | 42.1    | 15.5    | 3.17     | 1                       |                                  |                  |
| This study, FLNR | IUBC 5391 | 31                   | Revelstoke Lake | 51.149   | -118.202  | BC          | 2014-07-28   | Scale    |             |                            |         |         |          |                                         | -26.3                      | n          | 2.1            | -24.2                              | 5.8                   | 41.9    | 15.6    | 3.12     | 1                       |                                  |                  |
| This study, FLNR | IUBC 5392 | 32                   | Revelstoke Lake | 51.149   | -118.202  | BC          | 2014-07-28   | Scale    |             |                            |         |         |          |                                         | -26.6                      | n          | 2.1            | -24.5                              | 6.2                   | 45.4    | 16.9    | 3.13     | 1                       |                                  |                  |
| This study, FLNR | IUBC 5393 | 33                   | Revelstoke Lake | 51.149   | -118.202  | BC          | 2014-07-28   | Scale    |             |                            |         |         |          |                                         | -27.0                      | n          | 2.1            | -24.9                              | 6.5                   | 44.0    | 16.3    | 3.15     | 1                       |                                  |                  |
| This study, FLNR | IUBC 5394 | 37                   | Revelstoke Lake | 51.149   | -118.202  | BC          | 2014-07-28   | Scale    |             |                            |         |         |          |                                         | -27.1                      | n          | 2.1            | -24.9                              | 6.6                   | 45.9    | 16.9    | 3.16     | 1                       |                                  |                  |
| This study, FLNR | IUBC 5395 | 38                   | Revelstoke Lake | 51.149   | -118.202  | BC          | 2014-07-28   | Scale    |             |                            |         |         |          |                                         | -26.7                      | n          | 2.1            | -24.6                              | 6.4                   | 45.7    | 17.1    | 3.11     | 1                       |                                  |                  |
| This study, FLNR | IUBC 5396 | 39                   | Revelstoke Lake | 51.149   | -118.202  | BC          | 2014-07-28   | Scale    |             |                            |         |         |          |                                         | -26.7                      | n          | 2.1            | -24.6                              | 6.4                   | 45.7    | 17.0    | 3.13     | 1                       |                                  |                  |
| This study, FLNR | IUBC 5397 | 42                   | Revelstoke Lake | 51.149   | -118.202  | BC          | 2014-07-28   | Scale    |             |                            |         |         |          |                                         | -26.7                      | n          | 2.1            | -24.6                              | 6.2                   | 45.8    | 17.1    | 3.12     | 1                       |                                  |                  |
| This study, FLNR | IUBC 5398 | 43                   | Revelstoke Lake | 51.149   | -118.202  | BC          | 2014-07-28   | Scale    |             |                            |         |         |          |                                         | -26.9                      | n          | 2.1            | -24.8                              | 6.3                   | 45.7    | 17.1    | 3.12     | 1                       |                                  |                  |
| This study, FLNR | IUBC 5399 | 50                   | Revelstoke Lake | 51.149   | -118.202  | BC          | 2014-07-30   | Scale    |             |                            |         |         |          |                                         | -27.1                      | n          | 2.1            | -25.0                              | 6.4                   | 45.9    | 16.8    | 3.18     | 1                       |                                  |                  |
| This study, FLNR | IUBC 5400 | 61                   | Revelstoke Lake | 51.149   | -118.202  | BC          | 2014-07-30   | Scale    |             |                            |         |         |          |                                         | -27.0                      | n          | 2.1            | -24.9                              | 5.9                   | 46.0    | 16.7    | 3.21     | 1                       |                                  |                  |
| This study, BBM  | IUBC 4367 | 56-620               | Sand Lake       | 54.950   | -128.970  | BC          | 1956-08-18   | Scale    |             |                            |         |         |          |                                         | -30.5                      | y          | 0.5            | -29.5                              | 10.1                  | 43.1    | 13.9    | 3.61     | 1                       |                                  |                  |
| This study, BBM  | IUBC 4368 | 56-620               | Sand Lake       | 54.950   | -128.970  | BC          | 1956-08-18   | Scale    |             |                            |         |         |          |                                         | -29.7                      | y          | 0.5            | -28.7                              | 9.8                   | 42.3    | 14.2    | 3.47     | 1                       |                                  |                  |
| This study, BBM  | IUBC 4369 | 56-620               | Sand Lake       | 54.950   | -128.970  | BC          | 1956-08-18   | Scale    |             |                            |         |         |          |                                         | -30.4                      | y          | 0.5            | -29.4                              | 9.5                   | 42.9    | 13.8    | 3.61     | 1                       |                                  |                  |
| This study, BBM  | IUBC 4370 | 56-620               | Sand Lake       | 54.950   | -128.970  | BC          | 1956-08-18   | Scale    |             |                            |         |         |          |                                         | -30.4                      | y          | 0.5            | -29.4                              | 9.3                   | 42.7    | 13.9    | 3.57     | 1                       |                                  |                  |
| This study, BBM  | IUBC 4371 | 56-620               | Sand Lake       | 54.950   | -128.970  | BC          | 1956-08-18   | Scale    |             |                            |         |         |          |                                         | -30.8                      | y          | 0.5            | -29.8                              | 9.6                   | 43.0    | 13.5    | 3.70     | 1                       |                                  | C:N unacceptable |
| This study, BBM  | IUBC 4372 | 56-620               | Sand Lake       | 54.950   | -128.970  | BC          | 1956-08-18   | Scale    |             |                            |         |         |          |                                         | -30.8                      | y          | 0.5            | -29.8                              | 9.3                   | 42.8    | 13.6    | 3.66     | 1                       |                                  | C:N unacceptable |
| This study, BBM  | IUBC 4393 | 60-23                | Shuswap Lake    | 50.820   | -119.000  | BC          | 1960-03-00   | Scale    |             |                            |         |         |          |                                         | -27.0                      | y          | 0.6            | -25.9                              | 7.5                   | 45.6    | 14.5    | 3.66     | 1                       |                                  | C:N unacceptable |
| This study, BBM  | IUBC 4400 | 56-607               | Spectacle Lake  | 53.120   | -121.230  | BC          | 1956-08-06   | Scale    |             |                            |         |         |          |                                         | -29.1                      | y          | 0.5            | -28.1                              | 9.1                   | 42.7    | 13.9    | 3.58     | 1                       |                                  |                  |
| This study, BBM  | IUBC 4401 | 56-607               | Spectacle Lake  | 53.120   | -121.230  | BC          | 1956-08-06   | Scale    |             |                            |         |         |          |                                         | -28.9                      | y          | 0.5            | -27.9                              | 9.3                   | 42.6    | 14.1    | 3.51     | 1                       |                                  |                  |
| This study, BBM  | IUBC 4402 | 56-607               | Spectacle Lake  | 53.120   | -121.230  | BC          | 1956-08-06   | Scale    |             |                            |         |         |          |                                         | -28.0                      | y          | 0.5            | -27.0                              | 9.8                   | 42.3    | 14.4    | 3.42     | 1                       |                                  |                  |
| This study, RBCM | IUBC 3897 | 975-311-008, fish 1  | Tezzeron Lake   | 54.700   | -124.467  | BC          | 1978-06-25   | Scale    |             |                            |         |         |          |                                         | -29.5                      | y          | 0.8            | -28.2                              | 9.0                   | 42.5    | 14.6    | 3.39     | 1                       |                                  |                  |
| This study, RBCM | IUBC 3898 | 975-311-008, fish 2  | Tezzeron Lake   | 54.700   | -124.467  | BC          | 1975-06-28   | Scale    |             |                            |         |         |          |                                         | -29.7                      | y          | 0.8            | -28.3                              | 9.1                   | 41.0    | 14.3    | 3.35     | 1                       |                                  |                  |
| This study, RBCM | IUBC 3899 | 975-311-008, fish 3  | Tezzeron Lake   | 54.700   | -124.467  | BC          | 1975-06-28   | Scale    |             |                            |         |         |          |                                         | -29.9                      | y          | 0.8            | -28.6                              | 8.9                   | 44.3    | 15.1    | 3.42     | 1                       |                                  |                  |
| This study, RBCM | IUBC 3900 | 975-311-008, fish 4  | Tezzeron Lake   | 54.700   | -124.467  | BC          | 1975-06-28   | Scale    |             |                            |         |         |          |                                         | -30.1                      | y          | 0.8            | -28.8                              | 9.2                   | 44.2    | 15.3    | 3.38     | 1                       |                                  |                  |
| This study, RBCM | IUBC 3901 | 975-311-008, fish 5  | Tezzeron Lake   | 54.700   | -124.467  | BC          | 1975-06-28   | Scale    |             |                            |         |         |          |                                         | -30.5                      | y          | 0.8            | -29.1                              | 9.1                   | 44.3    | 15.2    | 3.39     | 1                       |                                  |                  |
| This study, RBCM | IUBC 3902 | 975-311-008, fish 6  | Tezzeron Lake   | 54.700   | -124.467  | BC          | 1975-06-28   | Scale    |             |                            |         |         |          |                                         | -30.3                      | y          | 0.8            | -29.0                              | 9.1                   | 39.1    | 13.3    | 3.43     | 1                       |                                  |                  |
| This study, RBCM | IUBC 3903 | 975-311-008, fish 7  | Tezzeron Lake   | 54.700   | -124.467  | BC          | 1975-06-28   | Scale    |             |                            |         |         |          |                                         | -30.3                      | y          | 0.8            | -29.0                              | 9.3                   | 44.3    | 15.2    | 3.41     | 1                       |                                  |                  |
| This study, RBCM | IUBC 3904 | 975-311-008, fish 8  | Tezzeron Lake   | 54.700   | -124.467  | BC          | 1975-06-28   | Scale    |             |                            |         |         |          |                                         | -30.1                      | y          | 0.8            | -28.7                              | 9.4                   | 44.1    | 15.4    | 3.34     | 1                       |                                  |                  |
| This study, RBCM | IUBC 3905 | 975-311-008, fish 9  | Tezzeron Lake   | 54.700   | -124.467  | BC          | 1975-06-28   | Scale    |             |                            |         |         |          |                                         | -30.8                      | y          | 0.8            | -29.5                              | 9.3                   | 42.5    | 14.2    | 3.50     | 1                       |                                  |                  |
| This study, RBCM | IUBC 3906 | 975-311-008, fish 10 | Tezzeron Lake   | 54.700   | -124.467  | BC          | 1975-06-28   | Scale    |             |                            |         |         |          |                                         | -30.2                      | y          | 0.8            | -28.9                              | 9.2                   | 44.4    | 15.4    | 3.37     | 1                       |                                  |                  |
| This study, RBCM | IUBC 3907 | 975-311-008, fish 11 | Tezzeron Lake   | 54.700   | -124.467  | BC          | 1975-06-28   | Scale    |             |                            |         |         |          |                                         | -30.1                      | y          | 0.8            | -28.8                              | 9.2                   | 44.3    | 15.4    | 3.34     | 1                       |                                  |                  |
| This study, RBCM | IUBC 3908 | 975-311-008, fish 12 | Tezzeron Lake   | 54.700   | -124.467  | BC          | 1975-06-28   | Scale    |             |                            |         |         |          |                                         | -31.0                      | y          | 0.8            | -29.7                              | 9.4                   | 45.2    | 14.9    | 3.54     | 1                       |                                  |                  |
| This study, RBCM | IUBC 3909 | 975-311-008, fish 13 | Tezzeron Lake   | 54.700   | -124.467  | BC          | 1975-06-28   | Scale    |             |                            |         |         |          |                                         | -30.1                      | y          | 0.8            | -28.8                              | 9.0                   | 44.0    | 15.4    | 3.35     | 1                       |                                  |                  |
| This study, RBCM | IUBC 3910 | 975-311-008, fish 14 | Tezzeron Lake   | 54.700   | -124.467  | BC          | 1975-06-28   | Scale    |             |                            |         |         |          |                                         | -30.3                      | y          | 0.8            | -29.0                              | 9.0                   | 45.2    | 15.5    | 3.41     | 1                       |                                  |                  |
| This study, RBCM | IUBC 3911 | 975-311-008, fish 15 | Tezzeron Lake   | 54.700   | -124.467  | BC          | 1975-06-28   | Scale    |             |                            |         |         |          |                                         | -31.0                      | y          | 0.8            | -29.7                              | 9.7                   | 44.3    | 14.7    | 3.51     | 1                       |                                  |                  |
| This study, RBCM | IUBC 3912 | 975-311-008, fish 16 | Tezzeron Lake   | 54.700   | -124.467  | BC          | 1975-06-28   | Scale    |             |                            |         |         |          |                                         | -29.8                      | y          | 0.8            | -28.5                              | 9.1                   | 43.3    | 15.1    | 3.35     | 1                       |                                  |                  |
| This study, RBCM | IUBC 3913 | 975-311-008, fish 17 | Tezzeron Lake   | 54.700   | -124.467  | BC          | 1975-06-28   | Scale    |             |                            |         |         |          |                                         | -31.2                      | y          | 0.8            | -29.9                              | 9.7                   | 44.1    | 14.7    | 3.50     | 1                       |                                  |                  |
| This study, RBCM | IUBC 3914 | 975-311-008, fish 18 | Tezzeron Lake   | 54.700   | -124.467  | BC          | 1975-06-28   | Scale    |             |                            |         |         |          |                                         | -31.0                      | y          | 0.8            | -29.7                              | 9.4                   | 45.1    | 14.6    | 3.60     | 1                       |                                  |                  |
| This study, RBCM | IUBC 3915 | 975-311-008, fish 19 | Tezzeron Lake   | 54.700   | -124.467  | BC          | 1975-06-28   | Scale    |             |                            |         |         |          |                                         | -31.3                      | y          | 0.8            | -29.9                              | 9.2                   | 44.6    | 14.3    | 3.63     | 1                       |                                  |                  |

| Source/Donor     | Lab No.   | Cat No               | Site Name            | Latitude | Longitude | Prov. State | Capture Date | Material | Col. Yld. % | Mus. $\delta^{13}\text{C}$ | Mus. %C | Mus. %N | Mus. C:N | Mus. $\delta^{13}\text{C}$ , lipid cor. | Col. $\delta^{13}\text{C}$ | Form. cor. | Suess cor. (‰) | $\delta^{13}\text{C}_{\text{cor}}$ | $\delta^{15}\text{N}$ | Col. %C | Col. %N | Col. C:N | <i>A priori</i> ecotype | $\delta^{13}\text{C}$ ecotype ID | Notes            |
|------------------|-----------|----------------------|----------------------|----------|-----------|-------------|--------------|----------|-------------|----------------------------|---------|---------|----------|-----------------------------------------|----------------------------|------------|----------------|------------------------------------|-----------------------|---------|---------|----------|-------------------------|----------------------------------|------------------|
| This study, RBCM | IUBC 3916 | 975-311-008, fish 20 | Tezzeron Lake        | 54.700   | -124.467  | BC          | 1975-06-28   | Scale    |             |                            |         |         |          |                                         | -30.0                      | y          | 0.8            | -28.6                              | 9.4                   | 44.4    | 15.2    | 3.40     | 1                       |                                  |                  |
| This study, RBCM | IUBC 3917 | 975-311-008, fish 21 | Tezzeron Lake        | 54.700   | -124.467  | BC          | 1975-06-28   | Scale    |             |                            |         |         |          |                                         | -29.7                      | y          | 0.8            | -28.4                              | 9.0                   | 44.1    | 15.2    | 3.39     | 1                       |                                  |                  |
| This study, BBM  | IUBC 4394 | 06-0105              | Thutade Lake         | 56.780   | -124.280  | BC          | 1998-06-16   | Scale    |             |                            |         |         |          |                                         | -28.6                      | y          | 1.5            | -26.6                              | 9.1                   | 45.6    | 15.3    | 3.48     | 1                       |                                  |                  |
| This study, BBM  | IUBC 4395 | 06-0105              | Thutade Lake         | 56.780   | -124.280  | BC          | 1998-06-16   | Scale    |             |                            |         |         |          |                                         | -28.9                      | y          | 1.5            | -26.9                              | 8.6                   | 42.3    | 13.9    | 3.54     | 1                       |                                  |                  |
| This study, BBM  | IUBC 4396 | 06-0105              | Thutade Lake         | 56.780   | -124.280  | BC          | 1998-06-16   | Scale    |             |                            |         |         |          |                                         | -28.3                      | y          | 1.5            | -26.3                              | 8.7                   | 42.1    | 14.4    | 3.41     | 1                       |                                  |                  |
| This study, BBM  | IUBC 4397 | 06-0105              | Thutade Lake         | 56.780   | -124.280  | BC          | 1998-06-16   | Scale    |             |                            |         |         |          |                                         | -28.9                      | y          | 1.5            | -26.9                              | 9.4                   | 42.4    | 14.4    | 3.44     | 1                       |                                  |                  |
| This study, BBM  | IUBC 4398 | 06-0105              | Thutade Lake         | 56.780   | -124.280  | BC          | 1998-06-16   | Scale    |             |                            |         |         |          |                                         | -28.3                      | y          | 1.5            | -26.3                              | 8.8                   | 42.0    | 14.5    | 3.38     | 1                       |                                  |                  |
| This study, FLNR | IUBC 5325 | 5                    | Wahleach Lake        | 49.233   | -121.612  | BC          | 2013-08-10   | Scale    |             |                            |         |         |          |                                         | -24.2                      | n          | 2.1            | -22.1                              | 6.3                   | 47.3    | 17.7    | 3.11     | 1                       |                                  |                  |
| This study, FLNR | IUBC 5326 | 9                    | Wahleach Lake        | 49.233   | -121.612  | BC          | 2013-08-10   | Scale    |             |                            |         |         |          |                                         | -24.0                      | n          | 2.1            | -21.9                              | 5.8                   | 47.7    | 18.3    | 3.04     | 1                       |                                  |                  |
| This study, FLNR | IUBC 5327 | 10                   | Wahleach Lake        | 49.233   | -121.612  | BC          | 2013-08-10   | Scale    |             |                            |         |         |          |                                         | -24.4                      | n          | 2.1            | -22.3                              | 6.3                   | 43.8    | 16.6    | 3.09     | 1                       |                                  |                  |
| This study, FLNR | IUBC 5328 | 12                   | Wahleach Lake        | 49.233   | -121.612  | BC          | 2013-08-10   | Scale    |             |                            |         |         |          |                                         | -24.2                      | n          | 2.1            | -22.1                              | 6.2                   | 47.0    | 18.0    | 3.04     | 1                       |                                  |                  |
| This study, FLNR | IUBC 5329 | 16                   | Wahleach Lake        | 49.233   | -121.612  | BC          | 2013-08-10   | Scale    |             |                            |         |         |          |                                         | -23.6                      | n          | 2.1            | -21.5                              | 6.2                   | 47.1    | 17.7    | 3.09     | 1                       |                                  |                  |
| This study, FLNR | IUBC 5330 | 20                   | Wahleach Lake        | 49.233   | -121.612  | BC          | 2013-08-10   | Scale    |             |                            |         |         |          |                                         | -24.2                      | n          | 2.1            | -22.1                              | 6.0                   | 47.1    | 17.8    | 3.09     | 1                       |                                  |                  |
| This study, FLNR | IUBC 5331 | 23                   | Wahleach Lake        | 49.233   | -121.612  | BC          | 2013-08-10   | Scale    |             |                            |         |         |          |                                         | -23.5                      | n          | 2.1            | -21.4                              | 6.1                   | 47.0    | 17.5    | 3.13     | 1                       |                                  |                  |
| This study, FLNR | IUBC 5332 | 32                   | Wahleach Lake        | 49.233   | -121.612  | BC          | 2013-08-10   | Scale    |             |                            |         |         |          |                                         | -23.8                      | n          | 2.1            | -21.8                              | 6.1                   | 47.1    | 17.9    | 3.07     | 1                       |                                  |                  |
| This study, FLNR | IUBC 5333 | 40                   | Wahleach Lake        | 49.233   | -121.612  | BC          | 2013-08-10   | Scale    |             |                            |         |         |          |                                         | -24.6                      | n          | 2.1            | -22.6                              | 6.1                   | 47.2    | 17.7    | 3.11     | 1                       |                                  |                  |
| This study, FLNR | IUBC 5334 | 42                   | Wahleach Lake        | 49.233   | -121.612  | BC          | 2013-08-10   | Scale    |             |                            |         |         |          |                                         | -23.8                      | n          | 2.1            | -21.7                              | 5.9                   | 47.1    | 17.7    | 3.11     | 1                       |                                  |                  |
| This study, FLNR | IUBC 5335 | 43                   | Wahleach Lake        | 49.233   | -121.612  | BC          | 2013-08-10   | Scale    |             |                            |         |         |          |                                         | -24.1                      | n          | 2.1            | -22.1                              | 6.0                   | 47.5    | 18.0    | 3.08     | 1                       |                                  |                  |
| This study, FLNR | IUBC 5336 | 120                  | Wahleach Lake        | 49.233   | -121.612  | BC          | 2013-08-10   | Scale    |             |                            |         |         |          |                                         | -25.2                      | n          | 2.1            | -23.1                              | 5.7                   | 46.9    | 17.8    | 3.08     | 1                       |                                  |                  |
| This study, FLNR | IUBC 5337 | 121                  | Wahleach Lake        | 49.233   | -121.612  | BC          | 2013-08-10   | Scale    |             |                            |         |         |          |                                         | -24.9                      | n          | 2.1            | -22.9                              | 6.3                   | 47.4    | 17.9    | 3.09     | 1                       |                                  |                  |
| This study, FLNR | IUBC 5338 | 124                  | Wahleach Lake        | 49.233   | -121.612  | BC          | 2013-08-10   | Scale    |             |                            |         |         |          |                                         | -24.0                      | n          | 2.1            | -22.0                              | 6.0                   | 44.6    | 16.3    | 3.19     | 1                       |                                  |                  |
| This study, FLNR | IUBC 5339 | 126                  | Wahleach Lake        | 49.233   | -121.612  | BC          | 2013-08-10   | Scale    |             |                            |         |         |          |                                         | -24.3                      | n          | 2.1            | -22.2                              | 5.2                   | 41.6    | 15.6    | 3.11     | 1                       |                                  |                  |
| This study, BBM  | IUBC 4373 | 55-272               | Wilson Lake          | 50.230   | -117.630  | BC          | 1955-08-02   | Scale    |             |                            |         |         |          |                                         | -27.5                      | y          | 0.5            | -26.6                              | 9.0                   | 42.7    | 13.8    | 3.61     | 1                       |                                  |                  |
| This study, ROM  | IUBC 4097 | 026551               | Babine River         | 55.603   | -127.160  | BC          | 1969-02-00   | Scale    |             |                            |         |         |          |                                         | -18.2                      | y          | 0.3            | -17.4                              | 10.8                  | 42.1    | 14.5    | 3.39     | 2                       |                                  |                  |
| This study, ROM  | IUBC 4098 | 026551               | Babine River         | 55.603   | -127.160  | BC          | 1969-02-00   | Scale    |             |                            |         |         |          |                                         | -18.6                      | y          | 0.3            | -17.8                              | 10.9                  | 42.1    | 14.1    | 3.48     | 2                       |                                  |                  |
| This study, ROM  | IUBC 4099 | 026551               | Babine River         | 55.603   | -127.160  | BC          | 1969-02-00   | Scale    |             |                            |         |         |          |                                         | -31.4                      | y          | 0.7            | -30.2                              | 8.5                   | 43.0    | 12.6    | 3.98     | 2                       |                                  | C:N unacceptable |
| This study, ROM  | IUBC 4212 | 026551               | Babine River         | 55.603   | -127.160  | BC          | 1969-02-00   | Scale    |             |                            |         |         |          |                                         | -18.1                      | y          | 0.3            | -17.2                              | 10.7                  | 41.1    | 13.7    | 3.49     | 2                       |                                  |                  |
| This study, TCAR | IUBC 6965 | 1                    | Barkley Sound        | 48.899   | -125.273  | BC          | 2016-00-00   | Scale    |             |                            |         |         |          |                                         | -17.2                      | n          | 1.2            | -15.9                              | 11.2                  | 40.4    | 15.0    | 3.15     | 2                       |                                  |                  |
| This study, TCAR | IUBC 6966 | 2                    | Barkley Sound        | 48.899   | -125.273  | BC          | 2016-00-00   | Scale    |             |                            |         |         |          |                                         | -17.3                      | n          | 1.2            | -16.1                              | 11.0                  | 40.4    | 15.1    | 3.12     | 2                       |                                  |                  |
| This study, TCAR | IUBC 6967 | 3                    | Barkley Sound        | 48.899   | -125.273  | BC          | 2016-00-00   | Scale    |             |                            |         |         |          |                                         | -18.3                      | n          | 1.2            | -17.1                              | 10.2                  | 40.4    | 15.0    | 3.14     | 2                       |                                  |                  |
| This study, TCAR | IUBC 6968 | 4                    | Barkley Sound        | 48.899   | -125.273  | BC          | 2016-00-00   | Scale    |             |                            |         |         |          |                                         | -18.0                      | n          | 1.2            | -16.7                              | 9.9                   | 40.2    | 14.8    | 3.16     | 2                       |                                  |                  |
| This study, BBM  | IUBC 4382 | 63-1045              | Lake Sarannoe        | 55.303   | 166.076   | RUS         | 1961-07-13   | Scale    |             |                            |         |         |          |                                         | -17.9                      | y          | 0.3            | -17.1                              | 11.1                  | 41.7    | 14.4    | 3.37     | 2                       |                                  |                  |
| This study, BBM  | IUBC 4383 | 63-1046              | Lake Sarannoe        | 55.303   | 166.076   | RUS         | 1961-07-14   | Scale    |             |                            |         |         |          |                                         | -16.8                      | y          | 0.3            | -16.0                              | 11.6                  | 44.6    | 15.5    | 3.35     | 2                       |                                  |                  |
| This study, MHHP | TEAL 3912 | 6                    | Moricetown Camp Side | 55.015   | -127.330  | BC          | 2009-00-00   | Scale    |             |                            |         |         |          |                                         | -18.1                      | n          | 1.0            | -17.0                              | 11.7                  | 42.4    | 15.2    | 3.26     | 2                       |                                  |                  |
| This study, MHHP | TEAL 3913 | 7                    | Moricetown Camp Side | 55.015   | -127.330  | BC          | 2009-00-00   | Scale    |             |                            |         |         |          |                                         | -18.3                      | n          | 1.0            | -17.2                              | 10.4                  | 42.4    | 15.1    | 3.27     | 2                       |                                  |                  |
| This study, MHHP | TEAL 3914 | 8                    | Moricetown Camp Side | 55.015   | -127.330  | BC          | 2009-00-00   | Scale    |             |                            |         |         |          |                                         | -18.4                      | n          | 1.0            | -17.3                              | 11.0                  | 41.6    | 14.8    | 3.28     | 2                       |                                  |                  |
| This study, MHHP | TEAL 3915 | 9                    | Moricetown Camp Side | 55.015   | -127.330  | BC          | 2009-00-00   | Scale    |             |                            |         |         |          |                                         | -18.2                      | n          | 1.0            | -17.2                              | 10.5                  | 42.0    | 15.2    | 3.22     | 2                       |                                  |                  |
| This study, MHHP | TEAL 3916 | 10                   | Moricetown Camp Side | 55.015   | -127.330  | BC          | 2009-00-00   | Scale    |             |                            |         |         |          |                                         | -18.3                      | n          | 1.0            | -17.3                              | 11.6                  | 42.5    | 15.3    | 3.25     | 2                       |                                  |                  |
| This study, MHHP | TEAL 3922 | 16                   | Moricetown Camp Side | 55.015   | -127.330  | BC          | 2009-00-00   | Scale    |             |                            |         |         |          |                                         | -18.6                      | n          | 1.0            | -17.6                              | 9.9                   | 37.3    | 13.9    | 3.13     | 2                       |                                  |                  |
| This study, MHHP | TEAL 3923 | 17                   | Moricetown Camp Side | 55.015   | -127.330  | BC          | 2009-00-00   | Scale    |             |                            |         |         |          |                                         | -17.8                      | n          | 1.0            | -16.8                              | 11.5                  | 42.6    | 15.0    | 3.31     | 2                       |                                  |                  |
| This study, MHHP | TEAL 3924 | 18                   | Moricetown Camp Side | 55.015   | -127.330  | BC          | 2009-00-00   | Scale    |             |                            |         |         |          |                                         | -17.8                      | n          | 1.0            | -16.8                              | 11.5                  | 42.0    | 15.2    | 3.21     | 2                       |                                  |                  |
| This study, MHHP | TEAL 3925 | 19                   | Moricetown Camp Side | 55.015   | -127.330  | BC          | 2009-00-00   | Scale    |             |                            |         |         |          |                                         | -18.1                      | n          | 1.0            | -17.1                              | 11.2                  | 42.0    | 15.1    | 3.24     | 2                       |                                  |                  |
| This study, MHHP | TEAL 3926 | 20                   | Moricetown Camp Side | 55.015   | -127.330  | BC          | 2009-00-00   | Scale    |             |                            |         |         |          |                                         | -17.9                      | n          | 1.0            | -16.9                              | 10.7                  | 42.5    | 15.0    | 3.31     | 2                       |                                  |                  |
| This study, ROM  | IUBC 4087 | 003188               | Owikeno Lake         | 51.675   | -126.899  | BC          | 1926-07-10   | Scale    |             |                            |         |         |          |                                         | -16.6                      | y          | 0.1            | -16.0                              | 14.0                  | 42.0    | 13.7    | 3.57     | 2                       |                                  |                  |
| This study, BH   | IUBC 6949 | S15046               | Rivers Inlet         | 51.674   | -127.267  | BC          | 2015-07-27   | Scale    |             |                            |         |         |          |                                         | -18.0                      | n          | 1.2            | -16.8                              | 10.0                  | 38.8    | 14.7    | 3.07     | 2                       |                                  |                  |
| This study, BH   | IUBC 6950 | S15054               | Rivers Inlet         | 51.674   | -127.267  | BC          | 2015-08-11   | Scale    |             |                            |         |         |          |                                         | -17.7                      | n          | 1.2            | -16.5                              | 10.5                  | 39.3    | 15.0    | 3.05     | 2                       |                                  |                  |
| This study, BH   | IUBC 6951 | S15058               | Rivers Inlet         | 51.674   | -127.267  | BC          | 2015-08-04   | Scale    |             |                            |         |         |          |                                         | -18.5                      | n          | 1.2            | -17.3                              | 10.6                  | 39.4    | 14.5    | 3.17     | 2                       |                                  |                  |
| This study, BH   | IUBC 6952 | S15062               | Rivers Inlet         | 51.674   | -127.267  | BC          | 2015-08-11   | Scale    |             |                            |         |         |          |                                         | -17.8                      | n          | 1.2            | -16.6                              | 10.5                  | 39.4    | 15.0    | 3.06     | 2                       |                                  |                  |
| This study, BH   | IUBC 6953 | S15064               | Rivers Inlet         | 51.674   | -127.267  | BC          | 2015-08-11   | Scale    |             |                            |         |         |          |                                         | -17.9                      | n          | 1.2            | -16.7                              | 10.9                  | 39.4    | 15.0    | 3.06     | 2                       |                                  |                  |
| This study, BH   | IUBC 6954 | S15066               | Rivers Inlet         | 51.674   | -127.267  | BC          | 2015-08-04   | Scale    |             |                            |         |         |          |                                         | -17.2                      | n          | 1.2            | -16.0                              | 10.6                  | 17.4    | 12.8    | 1.53     | 2                       |                                  | C:N unacceptable |

| Source/Donor     | Lab No.   | Cat No  | Site Name           | Latitude | Longitude | Prov. State | Capture Date | Material       | Col. Yld. % | Mus. $\delta^{13}\text{C}$ | Mus. %C | Mus. %N | Mus. C:N | Mus. $\delta^{13}\text{C}$ , lipid cor. | Col. $\delta^{13}\text{C}$ | Form. cor. | Suess cor. (‰) | $\delta^{13}\text{C}_{\text{cor}}$ | $\delta^{15}\text{N}$ | Col. %C | Col. %N | Col. C:N | <i>A priori</i> ecotype | $\delta^{13}\text{C}$ ecotype ID | Notes                  |
|------------------|-----------|---------|---------------------|----------|-----------|-------------|--------------|----------------|-------------|----------------------------|---------|---------|----------|-----------------------------------------|----------------------------|------------|----------------|------------------------------------|-----------------------|---------|---------|----------|-------------------------|----------------------------------|------------------------|
| This study, BH   | IUBC 6955 | S15067  | Rivers Inlet        | 51.674   | -127.267  | BC          | 2015-08-11   | Scale          |             |                            |         |         |          |                                         | -18.7                      | n          | 1.2            | -17.5                              | 10.4                  | 42.3    | 15.2    | 3.24     | 2                       |                                  |                        |
| This study, BH   | IUBC 6956 | S15080  | Rivers Inlet        | 51.674   | -127.267  | BC          | 2015-08-04   | Scale          |             |                            |         |         |          |                                         | -17.5                      | n          | 1.2            | -16.3                              | 10.5                  | 41.6    | 15.8    | 3.07     | 2                       |                                  |                        |
| This study, BH   | IUBC 6957 | S15084  | Rivers Inlet        | 51.674   | -127.267  | BC          | 2015-07-27   | Scale          |             |                            |         |         |          |                                         | -17.8                      | n          | 1.2            | -16.6                              | 10.3                  | 38.8    | 14.4    | 3.15     | 2                       |                                  |                        |
| This study, BH   | IUBC 6958 | S15087  | Rivers Inlet        | 51.674   | -127.267  | BC          | 2015-07-30   | Scale          |             |                            |         |         |          |                                         | -17.8                      | n          | 1.2            | -16.6                              | 11.4                  | 35.8    | 13.0    | 3.21     | 2                       |                                  |                        |
| This study, BH   | IUBC 6959 | S15094  | Rivers Inlet        | 51.674   | -127.267  | BC          | 2015-08-04   | Scale          |             |                            |         |         |          |                                         | -17.6                      | n          | 1.2            | -16.4                              | 10.9                  | 46.1    | 16.9    | 3.18     | 2                       |                                  |                        |
| This study, BH   | IUBC 6960 | S15095  | Rivers Inlet        | 51.674   | -127.267  | BC          | 2015-08-04   | Scale          |             |                            |         |         |          |                                         | -17.6                      | n          | 1.2            | -16.4                              | 10.5                  | 41.7    | 15.5    | 3.14     | 2                       |                                  |                        |
| This study, BH   | IUBC 6961 | S15098  | Rivers Inlet        | 51.674   | -127.267  | BC          | 2015-07-30   | Scale          |             |                            |         |         |          |                                         | -18.3                      | n          | 1.2            | -17.1                              | 9.9                   | 35.2    | 13.2    | 3.11     | 2                       |                                  |                        |
| This study, BH   | IUBC 6962 | S15099  | Rivers Inlet        | 51.674   | -127.267  | BC          | 2015-07-27   | Scale          |             |                            |         |         |          |                                         | -18.1                      | n          | 1.2            | -16.9                              | 10.7                  | 39.1    | 14.6    | 3.13     | 2                       |                                  |                        |
| This study, BH   | IUBC 6963 | S15104  | Rivers Inlet        | 51.674   | -127.267  | BC          | 2015-07-30   | Scale          |             |                            |         |         |          |                                         | -19.2                      | n          | 1.2            | -18.0                              | 10.7                  | 38.0    | 13.6    | 3.26     | 2                       |                                  |                        |
| This study, ROM  | IUBC 4086 | 003250  | Stamp Falls         | 49.334   | -124.921  | BC          | 1926-08-04   | Scale          |             |                            |         |         |          |                                         | -16.4                      | y          | 0.1            | -15.8                              | 13.5                  | 42.1    | 14.2    | 3.46     | 2                       |                                  |                        |
| This study, MHHP | TEAL 3907 | 1       | Sustut Lake         | 56.573   | -126.453  | BC          | 2006-00-00   | Scale          |             |                            |         |         |          |                                         | -18.2                      | n          | 1.3            | -17.0                              | 9.9                   | 42.0    | 15.7    | 3.12     | 2                       |                                  |                        |
| This study, MHHP | TEAL 3908 | 2       | Sustut Lake         | 56.573   | -126.453  | BC          | 2006-00-00   | Scale          |             |                            |         |         |          |                                         | -18.2                      | n          | 1.3            | -16.9                              | 10.4                  | 42.5    | 15.6    | 3.17     | 2                       |                                  |                        |
| This study, MHHP | TEAL 3909 | 3       | Sustut Lake         | 56.573   | -126.453  | BC          | 2006-00-00   | Scale          |             |                            |         |         |          |                                         | -17.8                      | n          | 1.3            | -16.5                              | 9.9                   | 45.9    | 17.0    | 3.15     | 2                       |                                  |                        |
| This study, MHHP | TEAL 3910 | 4       | Sustut Lake         | 56.573   | -126.453  | BC          | 2006-00-00   | Scale          |             |                            |         |         |          |                                         | -17.3                      | n          | 1.3            | -16.1                              | 11.3                  | 42.3    | 15.7    | 3.15     | 2                       |                                  |                        |
| This study, MHHP | TEAL 3911 | 5       | Sustut Lake         | 56.573   | -126.453  | BC          | 2006-00-00   | Scale          |             |                            |         |         |          |                                         | -17.8                      | n          | 1.3            | -16.6                              | 11.0                  | 42.3    | 15.6    | 3.17     | 2                       |                                  |                        |
| This study, MHHP | TEAL 3917 | 11      | Sustut Lake         | 56.573   | -126.453  | BC          | 2006-00-00   | Scale          |             |                            |         |         |          |                                         | -16.9                      | n          | 1.3            | -15.6                              | 11.8                  | 42.3    | 15.7    | 3.15     | 2                       |                                  |                        |
| This study, MHHP | TEAL 3918 | 12      | Sustut Lake         | 56.573   | -126.453  | BC          | 2006-00-00   | Scale          |             |                            |         |         |          |                                         | -17.8                      | n          | 1.3            | -16.5                              | 10.9                  | 42.0    | 15.7    | 3.13     | 2                       |                                  |                        |
| This study, MHHP | TEAL 3919 | 13      | Sustut Lake         | 56.573   | -126.453  | BC          | 2006-00-00   | Scale          |             |                            |         |         |          |                                         | -18.1                      | n          | 1.3            | -16.8                              | 10.9                  | 42.0    | 15.5    | 3.17     | 2                       |                                  |                        |
| This study, MHHP | TEAL 3921 | 15      | Sustut Lake         | 56.573   | -126.453  | BC          | 2006-00-00   | Scale          |             |                            |         |         |          |                                         | -18.4                      | n          | 1.3            | -17.1                              | 10.8                  | 43.6    | 15.9    | 3.20     | 2                       |                                  |                        |
| This study, XFN  | IUBC 5210 | NA      | Bear Lake (EkSa-36) | 51.510   | -124.236  | BC          | 0000-00-00   | Bone, vertebra | 0.1         |                            |         |         |          |                                         |                            | NA         |                |                                    |                       |         |         |          | 3                       |                                  | Insufficient col. yld. |
| This study, XFN  | IUBC 5213 | NA      | Bear Lake (EkSa-36) | 51.510   | -124.236  | BC          | 0000-00-00   | Bone, vertebra | 0.1         |                            |         |         |          |                                         |                            | NA         |                |                                    |                       |         |         |          | 3                       |                                  | Insufficient col. yld. |
| This study, FLNR | TEAL 1710 | 1       | Okanagan River      | 49.494   | -119.617  | BC          | 2018-10-09   | Bone, vertebra | 23.7        |                            |         |         |          |                                         | -23.8                      | n          | 2.3            | -21.7                              | 13.8                  | 45.0    | 16.5    | 3.17     | 3                       | 1                                |                        |
| This study, FLNR | TEAL 1711 | 2       | Okanagan River      | 49.494   | -119.617  | BC          | 2018-10-09   | Bone, vertebra | 21.8        |                            |         |         |          |                                         | -23.0                      | n          | 2.3            | -20.9                              | 14.1                  | 47.1    | 17.3    | 3.17     | 3                       | 1                                |                        |
| This study, FLNR | TEAL 1712 | 6       | Okanagan River      | 49.494   | -119.617  | BC          | 2018-10-09   | Bone, vertebra | 20.9        |                            |         |         |          |                                         | -22.8                      | n          | 2.3            | -20.7                              | 13.8                  | 46.7    | 17.2    | 3.16     | 3                       | 1                                |                        |
| This study, FLNR | TEAL 1713 | 11      | Okanagan River      | 49.494   | -119.617  | BC          | 2018-10-09   | Bone, vertebra | 18.6        |                            |         |         |          |                                         | -23.8                      | n          | 2.3            | -21.7                              | 14.1                  | 43.4    | 15.6    | 3.24     | 3                       | 1                                |                        |
| This study, FLNR | TEAL 1714 | 15      | Okanagan River      | 49.494   | -119.617  | BC          | 2018-10-09   | Bone, vertebra | 23.5        |                            |         |         |          |                                         | -17.0                      | n          | 1.3            | -15.7                              | 12.0                  | 40.3    | 15.2    | 3.10     | 3                       | 2                                |                        |
| This study, FLNR | TEAL 1715 | 19      | Okanagan River      | 49.494   | -119.617  | BC          | 2018-10-09   | Bone, vertebra | 20.8        |                            |         |         |          |                                         | -23.2                      | n          | 2.3            | -21.1                              | 14.0                  | 46.4    | 16.8    | 3.22     | 3                       | 1                                |                        |
| This study, FLNR | TEAL 1716 | 21      | Okanagan River      | 49.494   | -119.617  | BC          | 2018-10-09   | Bone, vertebra | 22.3        |                            |         |         |          |                                         | -18.4                      | n          | 1.3            | -17.1                              | 9.8                   | 44.5    | 16.7    | 3.11     | 3                       | 2                                |                        |
| This study, FLNR | TEAL 1717 | 28      | Okanagan River      | 49.494   | -119.617  | BC          | 2018-10-19   | Bone, vertebra | 22.5        |                            |         |         |          |                                         | -18.8                      | n          | 1.3            | -17.5                              | 10.2                  | 42.3    | 15.4    | 3.20     | 3                       | 2                                |                        |
| This study, FLNR | TEAL 1718 | 50      | Okanagan River      | 49.494   | -119.617  | BC          | 2018-10-19   | Bone, vertebra | 22.3        |                            |         |         |          |                                         | -17.8                      | n          | 1.3            | -16.5                              | 10.8                  | 47.1    | 17.4    | 3.15     | 3                       | 2                                |                        |
| This study, FLNR | TEAL 1719 | 54      | Okanagan River      | 49.494   | -119.617  | BC          | 2018-10-19   | Bone, vertebra | 22.3        |                            |         |         |          |                                         | -17.9                      | n          | 1.3            | -16.6                              | 11.0                  | 44.7    | 16.5    | 3.16     | 3                       | 2                                |                        |
| This study, FLNR | TEAL 1720 | 62      | Okanagan River      | 49.494   | -119.617  | BC          | 2018-10-19   | Bone, vertebra | 15.5        |                            |         |         |          |                                         | -17.6                      | n          | 1.3            | -16.3                              | 10.7                  | 46.9    | 17.5    | 3.13     | 3                       | 2                                |                        |
| This study, FLNR | TEAL 1721 | 76      | Okanagan River      | 49.494   | -119.617  | BC          | 2018-10-19   | Bone, vertebra | 21.1        |                            |         |         |          |                                         | -18.2                      | n          | 1.3            | -16.9                              | 10.2                  | 46.6    | 17.4    | 3.13     | 3                       | 2                                |                        |
| This study, FLNR | TEAL 1722 | 89      | Okanagan River      | 49.494   | -119.617  | BC          | 2018-10-19   | Bone, vertebra | 20.5        |                            |         |         |          |                                         | -18.0                      | n          | 1.3            | -16.7                              | 10.9                  | 44.8    | 16.8    | 3.10     | 3                       | 2                                |                        |
| This study, XFN  | IUBC 5165 | NA      | Shields (EkSA-13)   | 51.510   | -124.236  | BC          | 0000-00-00   | Bone, vertebra | 0.4         |                            |         |         |          |                                         |                            | NA         |                |                                    |                       |         |         |          | 3                       |                                  | Insufficient col. yld. |
| This study, XFN  | IUBC 5168 | NA      | Shields (EkSA-13)   | 51.510   | -124.236  | BC          | 0000-00-00   | Bone, vertebra | 0.3         |                            |         |         |          |                                         |                            | NA         |                |                                    |                       |         |         |          | 3                       |                                  | Insufficient col. yld. |
| This study, XFN  | IUBC 5189 | NA      | Shields (EkSA-13)   | 51.510   | -124.236  | BC          | 0000-00-00   | Bone, vertebra | 0.1         |                            |         |         |          |                                         |                            | NA         |                |                                    |                       |         |         |          | 3                       |                                  | Insufficient col. yld. |
| This study, XFN  | IUBC 5190 | NA      | Shields (EkSA-13)   | 51.510   | -124.236  | BC          | 0000-00-00   | Bone, vertebra | 0.2         |                            |         |         |          |                                         |                            | NA         |                |                                    |                       |         |         |          | 3                       |                                  | Insufficient col. yld. |
| This study, XFN  | IUBC 5204 | NA      | Shields (EkSA-13)   | 51.510   | -124.236  | BC          | 0000-00-00   | Bone, vertebra | 0.2         |                            |         |         |          |                                         |                            | NA         |                |                                    |                       |         |         |          | 3                       |                                  | Insufficient col. yld. |
| This study, XFN  | IUBC 5205 | NA      | Shields (EkSA-13)   | 51.510   | -124.236  | BC          | 0000-00-00   | Bone, vertebra | 0.2         |                            |         |         |          |                                         |                            | NA         |                |                                    |                       |         |         |          | 3                       |                                  | Insufficient col. yld. |
| This study, XFN  | IUBC 5209 | NA      | Shields (EkSA-13)   | 51.510   | -124.236  | BC          | 0000-00-00   | Bone, vertebra | 0.2         |                            |         |         |          |                                         |                            | NA         |                |                                    |                       |         |         |          | 3                       |                                  | Insufficient col. yld. |
| This study, BBM  | IUBC 4403 | 56-0455 | Babine Lake         | 54.800   | -126.130  | BC          | 1956-07-17   | Scale          |             |                            |         |         |          |                                         | -27.9                      | y          | 0.5            | -26.9                              | 7.8                   | 42.4    | 14.0    | 3.52     | 4                       | 1                                |                        |
| This study, BBM  | IUBC 4404 | 56-0455 | Babine Lake         | 54.800   | -126.130  | BC          | 1956-07-17   | Scale          |             |                            |         |         |          |                                         | -27.7                      | y          | 0.5            | -26.7                              | 8.2                   | 41.9    | 14.1    | 3.46     | 4                       | 1                                |                        |
| This study, BBM  | IUBC 4405 | 56-0455 | Babine Lake         | 54.800   | -126.130  | BC          | 1956-07-17   | Scale          |             |                            |         |         |          |                                         | -27.5                      | y          | 0.5            | -26.5                              | 7.9                   | 34.8    | 11.8    | 3.44     | 4                       | 1                                |                        |
| This study, ROM  | IUBC 4089 | 004069  | Columbia River      | 49.094   | -117.698  | BC          | 1926-10-09   | Scale          |             |                            |         |         |          |                                         | -17.6                      | y          | 0.1            | -17.0                              | 12.4                  | 41.6    | 13.9    | 3.48     | 4                       | 2                                |                        |
| This study, ROM  | IUBC 4088 | 004028  | Eagle Lake          | 50.985   | -118.630  | BC          | 1926-09-07   | Scale          |             |                            |         |         |          |                                         | -25.8                      | y          | 0.2            | -25.1                              | 7.7                   | 41.6    | 14.1    | 3.45     | 4                       | 1                                |                        |
| This study, ROM  | IUBC 4067 | 006802  | Harrison Lake       | 49.562   | -121.862  |             | 1925-10-00   | Scale          |             |                            |         |         |          |                                         | -25.5                      | y          | 0.2            | -24.8                              | 8.7                   | 42.8    | 14.2    | 3.51     | 4                       | 1                                |                        |
| This study, ROM  | IUBC 4066 | 003327  | Okanagan Lake       | 49.834   | -119.524  | BC          | 1926-07-10   | Scale          |             |                            |         |         |          |                                         | -24.1                      | y          | 0.2            | -23.3                              | 6.7                   | 43.3    | 14.3    | 3.54     | 4                       | 1                                |                        |
| This study, BBM  | IUBC 4380 | 56-538  | Osoyoos Lake        | 49.022   | -119.454  | BC          | 1956-08-23   | Scale          |             |                            |         |         |          |                                         | -18.0                      | y          | 0.2            | -17.2                              | 12.0                  | 41.3    | 14.3    | 3.36     | 4                       | 2                                |                        |
| This study, BBM  | IUBC 4381 | 56-538  | Osoyoos Lake        | 49.022   | -119.454  | BC          | 1956-08-23   | Scale          |             |                            |         |         |          |                                         | -18.4                      | y          | 0.2            | -17.6                              | 10.7                  | 41.3    | 14.5    | 3.31     | 4                       | 2                                |                        |

| Source/Donor                | Lab No.   | Cat No          | Site Name           | Latitude | Longitude | Prov. State | Capture Date | Material       | Col. Yld. % | Mus. $\delta^{13}\text{C}$ | Mus. %C | Mus. %N | Mus. C:N | Mus. $\delta^{13}\text{C}$ , lipid cor. | Col. $\delta^{13}\text{C}$ | Form. cor. | Suess cor. (‰) | $\delta^{13}\text{C}_{\text{cor}}$ | $\delta^{15}\text{N}$ | Col. %C | Col. %N | Col. C:N | A priori ecotype | $\delta^{13}\text{C}$ ecotype ID | Notes                   |
|-----------------------------|-----------|-----------------|---------------------|----------|-----------|-------------|--------------|----------------|-------------|----------------------------|---------|---------|----------|-----------------------------------------|----------------------------|------------|----------------|------------------------------------|-----------------------|---------|---------|----------|------------------|----------------------------------|-------------------------|
| This study, BBM             | IUBC 4399 | 57-196          | Saomenos Creek      | 48.770   | -123.670  | BC          | 1957-00-00   | Scale          |             |                            |         |         |          |                                         | -26.6                      | y          | 0.5            | -25.6                              | 7.1                   | 41.6    | 14.9    | 3.25     | 4                | 1                                |                         |
| This study, ROM             | IUBC 4068 | 007009          | Shuswap Lake        | 50.820   | -119.000  | BC          | 1928-06-31   | Scale          |             |                            |         |         |          |                                         | -26.0                      | y          | 0.2            | -25.2                              | 7.8                   | 43.2    | 14.2    | 3.55     | 4                | 1                                |                         |
| This study, BBM             | IUBC 4384 | 60-23           | Shuswap Lake        | 50.820   | -119.000  | BC          | 1960-03-00   | Scale          |             |                            |         |         |          |                                         | -27.3                      | y          | 0.2            | -26.6                              | 8.3                   | 45.3    | 14.8    | 3.56     | 4                | 1                                |                         |
| This study, BBM             | IUBC 4386 | 60-23           | Shuswap Lake        | 50.820   | -119.000  | BC          | 1960-03-00   | Scale          |             |                            |         |         |          |                                         | -27.1                      | y          | 0.2            | -26.4                              | 8.0                   | 45.2    | 15.2    | 3.46     | 4                | 1                                |                         |
| This study, BBM             | IUBC 4387 | 60-23           | Shuswap Lake        | 50.820   | -119.000  | BC          | 1960-03-00   | Scale          |             |                            |         |         |          |                                         | -26.9                      | y          | 0.2            | -26.2                              | 8.5                   | 45.2    | 15.1    | 3.49     | 4                | 1                                |                         |
| This study, BBM             | IUBC 4388 | 60-23           | Shuswap Lake        | 50.820   | -119.000  | BC          | 1960-03-00   | Scale          |             |                            |         |         |          |                                         | -26.9                      | y          | 0.2            | -26.1                              | 7.5                   | 45.4    | 15.3    | 3.47     | 4                | 1                                |                         |
| This study, BBM             | IUBC 4389 | 60-23           | Shuswap Lake        | 50.820   | -119.000  | BC          | 1960-03-00   | Scale          |             |                            |         |         |          |                                         | -26.9                      | y          | 0.2            | -26.2                              | 8.2                   | 45.1    | 14.9    | 3.54     | 4                | 1                                |                         |
| This study, BBM             | IUBC 4390 | 60-23           | Shuswap Lake        | 50.820   | -119.000  | BC          | 1960-03-00   | Scale          |             |                            |         |         |          |                                         | -26.9                      | y          | 0.2            | -26.2                              | 7.5                   | 45.5    | 15.0    | 3.54     | 4                | 1                                |                         |
| This study, BBM             | IUBC 4391 | 60-23           | Shuswap Lake        | 50.820   | -119.000  | BC          | 1960-03-00   | Scale          |             |                            |         |         |          |                                         | -27.0                      | y          | 0.2            | -26.3                              | 8.1                   | 45.6    | 14.7    | 3.62     | 4                | 1                                |                         |
| This study, BBM             | IUBC 4392 | 60-23           | Shuswap Lake        | 50.820   | -119.000  | BC          | 1960-03-00   | Scale          |             |                            |         |         |          |                                         | -26.8                      | y          | 0.2            | -26.1                              | 8.4                   | 45.4    | 15.0    | 3.54     | 4                | 1                                |                         |
| This study, ROM             | IUBC 4077 | 006609          | Tum Tum Creek       | 51.881   | -119.116  | BC          | 1929-09-18   | Scale          |             |                            |         |         |          |                                         | -27.0                      | y          | 0.2            | -26.3                              | 8.9                   | 42.7    | 14.2    | 3.50     | 4                | 1                                |                         |
| This study, XFN             | IUBC 5211 | NA              | Bear Lake (EkSa-36) | 51.510   | -124.236  | BC          | 0000-00-00   | Bone, vertebra | 9.0         |                            |         |         |          |                                         | -16.1                      | n          | 0.0            | -16.1                              | 9.8                   | 39.1    | 14.1    | 3.23     | 5                | 2                                |                         |
| This study, XFN             | IUBC 5214 | NA              | Bear Lake (EkSa-36) | 51.510   | -124.236  | BC          | 0000-00-00   | Bone, vertebra | 11.7        |                            |         |         |          |                                         | -15.6                      | n          | 0.0            | -15.6                              | 10.3                  | 40.3    | 14.5    | 3.24     | 5                | 2                                |                         |
| This study, XFN             | IUBC 5215 | NA              | Bear Lake (EkSa-36) | 51.510   | -124.236  | BC          | 0000-00-00   | Bone, vertebra | 7.1         |                            |         |         |          |                                         | -16.0                      | n          | 0.0            | -16.0                              | 9.7                   | 38.7    | 14.0    | 3.22     | 5                | 2                                |                         |
| This study, XFN             | IUBC 5216 | NA              | Bear Lake (EkSa-36) | 51.510   | -124.236  | BC          | 0000-00-00   | Bone, vertebra | 9.5         |                            |         |         |          |                                         | -16.3                      | n          | 0.0            | -16.3                              | 11.3                  | 38.6    | 13.9    | 3.24     | 5                | 2                                |                         |
| This study, XFN             | IUBC 5217 | NA              | Bear Lake (EkSa-36) | 51.510   | -124.236  | BC          | 0000-00-00   | Bone, vertebra | 3.1         |                            |         |         |          |                                         | -16.2                      | n          | 0.0            | -16.2                              | 9.5                   | 39.2    | 14.1    | 3.25     | 5                | 2                                |                         |
| This study, XFN             | IUBC 5218 | NA              | Bear Lake (EkSa-36) | 51.510   | -124.236  | BC          | 0000-00-00   | Bone, vertebra | 11.7        |                            |         |         |          |                                         | -16.1                      | n          | 0.0            | -16.0                              | 11.5                  | 39.6    | 14.5    | 3.17     | 5                | 2                                |                         |
| This study, XFN             | IUBC 5219 | NA              | Bear Lake (EkSa-36) | 51.510   | -124.236  | BC          | 0000-00-00   | Bone, vertebra | 5.6         |                            |         |         |          |                                         | -16.2                      | n          | 0.0            | -16.2                              | 11.1                  | 39.5    | 14.3    | 3.23     | 5                | 2                                |                         |
| This study, XFN             | IUBC 5220 | NA              | Bear Lake (EkSa-36) | 51.510   | -124.236  | BC          | 0000-00-00   | Bone, vertebra | 10.6        |                            |         |         |          |                                         | -15.7                      | n          | 0.0            | -15.7                              | 10.2                  | 39.8    | 14.7    | 3.17     | 5                | 2                                |                         |
| This study, XFN             | IUBC 5221 | NA              | Bear Lake (EkSa-36) | 51.510   | -124.236  | BC          | 0000-00-00   | Bone, vertebra | 9.4         |                            |         |         |          |                                         | -15.9                      | n          | 0.0            | -15.9                              | 10.5                  | 39.1    | 14.2    | 3.21     | 5                | 2                                |                         |
| This study, XFN             | IUBC 5222 | NA              | Bear Lake (EkSa-36) | 51.510   | -124.236  | BC          | 0000-00-00   | Bone, vertebra | 13.5        |                            |         |         |          |                                         | -15.8                      | n          | 0.0            | -15.8                              | 9.4                   | 40.9    | 15.0    | 3.17     | 5                | 2                                |                         |
| This study, XFN             | IUBC 5223 | NA              | Bear Lake (EkSa-36) | 51.510   | -124.236  | BC          | 0000-00-00   | Bone, vertebra | 9.3         |                            |         |         |          |                                         | -16.0                      | n          | 0.0            | -16.0                              | 10.4                  | 39.6    | 14.2    | 3.25     | 5                | 2                                |                         |
| This study, XFN             | IUBC 5224 | NA              | Bear Lake (EkSa-36) | 51.510   | -124.236  | BC          | 0000-00-00   | Bone, vertebra | 9.7         |                            |         |         |          |                                         | -16.3                      | n          | 0.0            | -16.3                              | 10.3                  | 40.3    | 14.7    | 3.21     | 5                | 2                                |                         |
| This study, XFN             | IUBC 5225 | NA              | Bear Lake (EkSa-36) | 51.510   | -124.236  | BC          | 0000-00-00   | Bone, vertebra | 9.3         |                            |         |         |          |                                         | -15.6                      | n          | 0.0            | -15.6                              | 11.7                  | 40.2    | 14.8    | 3.18     | 5                | 2                                |                         |
| This study, XFN             | IUBC 5226 | NA              | Bear Lake (EkSa-36) | 51.510   | -124.236  | BC          | 0000-00-00   | Bone, vertebra | 7.4         |                            |         |         |          |                                         | -16.1                      | n          | 0.0            | -16.1                              | 10.8                  | 40.1    | 14.4    | 3.25     | 5                | 2                                |                         |
| This study, XFN             | IUBC 5227 | NA              | Bear Lake (EkSa-36) | 51.510   | -124.236  | BC          | 0000-00-00   | Bone, vertebra | 11.2        |                            |         |         |          |                                         | -16.1                      | n          | 0.0            | -16.1                              | 10.8                  | 39.9    | 14.2    | 3.28     | 5                | 2                                |                         |
| This study, XFN             | IUBC 5228 | NA              | Bear Lake (EkSa-36) | 51.510   | -124.236  | BC          | 0000-00-00   | Bone, vertebra | 5.6         |                            |         |         |          |                                         | -16.9                      | n          | 0.0            | -16.8                              | 10.6                  | 37.0    | 12.8    | 3.37     | 5                | 2                                |                         |
| This study, XFN             | IUBC 5229 | NA              | Bear Lake (EkSa-36) | 51.510   | -124.236  | BC          | 0000-00-00   | Bone, vertebra | 6.3         |                            |         |         |          |                                         | -17.0                      | n          | 0.0            | -17.0                              | 9.3                   | 39.5    | 14.0    | 3.28     | 5                | 2                                |                         |
| This study, XFN             | IUBC 5161 | NA              | Shields (EkSA-13)   | 51.510   | -124.236  | BC          | 0000-00-00   | Bone, vertebra | 4.8         |                            |         |         |          |                                         | -15.2                      | n          | 0.0            | -15.2                              | 12.4                  | 37.8    | 13.7    | 3.23     | 5                | 2                                |                         |
| This study, XFN             | IUBC 5166 | NA              | Shields (EkSA-13)   | 51.510   | -124.236  | BC          | 0000-00-00   | Bone, vertebra | 15.0        |                            |         |         |          |                                         | -16.2                      | n          | 0.0            | -16.2                              | 9.0                   | 41.4    | 15.1    | 3.20     | 5                | 2                                |                         |
| This study, XFN             | IUBC 5167 | NA              | Shields (EkSA-13)   | 51.510   | -124.236  | BC          | 0000-00-00   | Bone, vertebra | 2.6         |                            |         |         |          |                                         | -15.9                      | n          | 0.0            | -15.9                              | 10.5                  | 40.5    | 14.6    | 3.24     | 5                | 2                                |                         |
| This study, XFN             | IUBC 5182 | NA              | Shields (EkSA-13)   | 51.510   | -124.236  | BC          | 0000-00-00   | Bone, vertebra | 7.0         |                            |         |         |          |                                         | -15.8                      | n          | 0.0            | -15.8                              | 10.1                  | 41.4    | 15.1    | 3.19     | 5                | 2                                |                         |
| This study, XFN             | IUBC 5183 | NA              | Shields (EkSA-13)   | 51.510   | -124.236  | BC          | 0000-00-00   | Bone, vertebra | 4.9         |                            |         |         |          |                                         | -16.5                      | n          | 0.0            | -16.5                              | 9.3                   | 40.6    | 14.5    | 3.26     | 5                | 2                                |                         |
| This study, XFN             | IUBC 5206 | NA              | Shields (EkSA-13)   | 51.510   | -124.236  | BC          | 0000-00-00   | Bone, vertebra | 4.7         |                            |         |         |          |                                         | -16.3                      | n          | 0.0            | -16.3                              | 9.6                   | 37.7    | 13.5    | 3.27     | 5                | 2                                |                         |
| This study, XFN             | IUBC 5207 | NA              | Shields (EkSA-13)   | 51.510   | -124.236  | BC          | 0000-00-00   | Bone, vertebra | 9.0         |                            |         |         |          |                                         | -13.6                      | n          | 0.0            | -16.2                              | 14.8                  | 41.2    | 14.9    | 3.20     | 5                | NA                               | O. kistuch              |
| This study, XFN             | IUBC 5208 | NA              | Shields (EkSA-13)   | 51.510   | -124.236  | BC          | 0000-00-00   | Bone, vertebra | 2.4         |                            |         |         |          |                                         | -16.2                      | n          | 0.0            | -16.2                              | 9.8                   | 40.1    | 14.0    | 3.35     | 5                | 2                                |                         |
| Satterfield and Finney 2002 |           | EGEGIK 13       | Beacharof Lake      | 57.500   | -156.070  | AK          | 1997-00-00   | Scale          |             |                            |         |         |          |                                         | -21.3                      | n          | 1.4            | -19.9                              | 8.1                   | 42.0    | 16.0    | 3.07     | 1                |                                  | Smolt                   |
| Satterfield and Finney 2002 |           | EGEGIK 7        | Beacharof Lake      | 57.500   | -156.070  | AK          | 1997-00-00   | Scale          |             |                            |         |         |          |                                         | -21.6                      | n          | 1.4            | -20.2                              | 7.5                   | 41.1    | 15.0    | 3.20     | 1                |                                  | Smolt                   |
| Satterfield and Finney 2002 |           | EGEGIK 4        | Beacharof Lake      | 57.500   | -156.070  | AK          | 1997-00-00   | Scale          |             |                            |         |         |          |                                         | -21.7                      | n          | 1.4            | -20.2                              | 7.5                   | 41.3    | 15.0    | 3.21     | 1                |                                  | Smolt                   |
| Satterfield and Finney 2002 |           | EGEGIK 9        | Beacharof Lake      | 57.500   | -156.070  | AK          | 1997-00-00   | Scale          |             |                            |         |         |          |                                         | -22.4                      | n          | 1.4            | -20.9                              | 7.8                   | 26.9    | 9.5     | 3.31     | 1                |                                  | Smolt                   |
| Satterfield and Finney 2002 |           | EGEGIK 15       | Beacharof Lake      | 57.500   | -156.070  | AK          | 1997-00-00   | Scale          |             |                            |         |         |          |                                         | -21.7                      | n          | 1.4            | -20.3                              | 8.1                   | 36.4    | 12.6    | 3.38     | 1                |                                  | Smolt                   |
| Satterfield and Finney 2002 |           | CHIGNIK 12      | Chignik Lake        | 56.140   | -158.490  | AK          | 1997-00-00   | Scale          |             |                            |         |         |          |                                         | -24.1                      | n          | 1.4            | -22.6                              | 8.9                   | 43.8    | 16.4    | 3.12     | 1                |                                  | Smolt                   |
| Satterfield and Finney 2002 |           | CHIGNIK 17      | Chignik Lake        | 56.140   | -158.490  | AK          | 1997-00-00   | Scale          |             |                            |         |         |          |                                         | -24.1                      | n          | 1.4            | -22.7                              | 8.7                   | 36.4    | 13.4    | 3.17     | 1                |                                  | Smolt                   |
| Satterfield and Finney 2002 |           | CHIGNIK 7       | Chignik Lake        | 56.140   | -158.490  | AK          | 1997-00-00   | Scale          |             |                            |         |         |          |                                         | -24.9                      | n          | 1.4            | -23.5                              | 8.8                   | 48.7    | 17.8    | 3.20     | 1                |                                  | Smolt                   |
| Satterfield and Finney 2002 |           | CHIGNIK 15      | Chignik Lake        | 56.140   | -158.490  | AK          | 1997-00-00   | Scale          |             |                            |         |         |          |                                         | -24.1                      | n          | 1.4            | -22.7                              | 8.9                   | 34.9    | 12.4    | 3.30     | 1                |                                  | Smolt                   |
| Satterfield and Finney 2002 |           | CHIGNIK 20      | Chignik Lake        | 56.140   | -158.490  | AK          | 1997-00-00   | Scale          |             |                            |         |         |          |                                         | -23.9                      | n          | 1.4            | -22.5                              | 9.1                   | 41.0    | 13.7    | 3.49     | 1                |                                  | Smolt                   |
| Satterfield and Finney 2002 |           | COGHILL-SC-97-4 | Coghill Lake        | 61.040   | -147.290  | AK          | 1997-00-00   | Scale          |             |                            |         |         |          |                                         | -31.6                      | n          | 1.4            | -30.2                              | 7.3                   | 33.0    | 13.7    | 2.82     | 1                |                                  | C:N unacceptable, Smolt |
| Satterfield and Finney 2002 |           | COGHILL-SC-97-2 | Coghill Lake        | 61.040   | -147.290  | AK          | 1997-00-00   | Scale          |             |                            |         |         |          |                                         | -30.2                      | n          | 1.4            | -28.8                              | 8.3                   | 32.7    | 12.9    | 2.96     | 1                |                                  | Smolt                   |
| Satterfield and Finney 2002 |           | COGHILL-SC-97-3 | Coghill Lake        | 61.040   | -147.290  | AK          | 1997-00-00   | Scale          |             |                            |         |         |          |                                         | -31.3                      | n          | 1.4            | -29.9                              | 7.7                   | 33.3    | 12.2    | 3.20     | 1                |                                  | Smolt                   |
| Satterfield and Finney 2002 |           | COGHILL-SC-97-5 | Coghill Lake        | 61.040   | -147.290  | AK          | 1997-00-00   | Scale          |             |                            |         |         |          |                                         | -29.2                      | n          | 1.4            | -27.8                              | 6.9                   |         |         |          | 1                |                                  | Smolt                   |

| Source/Donor                | Lab No. | Cat No           | Site Name        | Latitude | Longitude | Prov. State | Capture Date | Material | Col. Yld. % | Mus. $\delta^{13}\text{C}$ | Mus. %C | Mus. %N | Mus. C:N | Mus. $\delta^{13}\text{C}$ , lipid cor. | Col. $\delta^{13}\text{C}$ | Form. cor. | Suess cor. (‰) | $\delta^{13}\text{C}_{\text{cor}}$ | $\delta^{15}\text{N}$ | Col. %C | Col. %N | Col. C:N | <i>A priori</i> ecotype | $\delta^{13}\text{C}$ ecotype ID | Notes                   |
|-----------------------------|---------|------------------|------------------|----------|-----------|-------------|--------------|----------|-------------|----------------------------|---------|---------|----------|-----------------------------------------|----------------------------|------------|----------------|------------------------------------|-----------------------|---------|---------|----------|-------------------------|----------------------------------|-------------------------|
| Meeuwig and Peacock 2017    |         | NA               | Fallen Leaf Lake | 38.903   | -120.062  | CA          | 2009-00-00   | Muscle   |             |                            |         |         |          | -26.3                                   | *-22.6                     | n          | 1.9            | -20.7                              | 4.8                   |         |         |          | 1                       |                                  |                         |
| Meeuwig and Peacock 2017    |         | NA               | Fallen Leaf Lake | 38.903   | -120.062  | CA          | 2009-00-00   | Muscle   |             |                            |         |         |          | -26.3                                   | *-22.6                     | n          | 1.9            | -20.7                              | 5.4                   |         |         |          | 1                       |                                  |                         |
| Meeuwig and Peacock 2017    |         | NA               | Fallen Leaf Lake | 38.903   | -120.062  | CA          | 2009-00-00   | Muscle   |             |                            |         |         |          | -26.2                                   | *-22.5                     | n          | 1.9            | -20.6                              | 4.8                   |         |         |          | 1                       |                                  |                         |
| Meeuwig and Peacock 2017    |         | NA               | Fallen Leaf Lake | 38.903   | -120.062  | CA          | 2009-00-00   | Muscle   |             |                            |         |         |          | -26.2                                   | *-22.5                     | n          | 1.9            | -20.6                              | 4.7                   |         |         |          | 1                       |                                  |                         |
| Meeuwig and Peacock 2017    |         | NA               | Fallen Leaf Lake | 38.903   | -120.062  | CA          | 2009-00-00   | Muscle   |             |                            |         |         |          | -26.2                                   | *-22.5                     | n          | 1.9            | -20.6                              | 5.1                   |         |         |          | 1                       |                                  |                         |
| Meeuwig and Peacock 2017    |         | NA               | Fallen Leaf Lake | 38.903   | -120.062  | CA          | 2009-00-00   | Muscle   |             |                            |         |         |          | -26.1                                   | *-22.4                     | n          | 1.9            | -20.5                              | 5.0                   |         |         |          | 1                       |                                  |                         |
| Meeuwig and Peacock 2017    |         | NA               | Fallen Leaf Lake | 38.903   | -120.062  | CA          | 2009-00-00   | Muscle   |             |                            |         |         |          | -26.1                                   | *-22.4                     | n          | 1.9            | -20.5                              | 4.9                   |         |         |          | 1                       |                                  |                         |
| Meeuwig and Peacock 2017    |         | NA               | Fallen Leaf Lake | 38.903   | -120.062  | CA          | 2009-00-00   | Muscle   |             |                            |         |         |          | -25.9                                   | *-22.2                     | n          | 1.9            | -20.3                              | 4.1                   |         |         |          | 1                       |                                  |                         |
| Satterfield and Finney 2002 |         | HIDDEN 5         | Hidden Lake      | 58.230   | -152.420  | AK          | 1997-00-00   | Scale    |             |                            |         |         |          |                                         | -27.1                      | n          | 1.4            | -25.7                              | 6.3                   | 45.6    | 18.4    | 2.90     | 1                       |                                  | C:N unacceptable, Smolt |
| Satterfield and Finney 2002 |         | HIDDEN 1         | Hidden Lake      | 58.230   | -152.420  | AK          | 1997-00-00   | Scale    |             |                            |         |         |          |                                         | -27.2                      | n          | 1.4            | -25.7                              | 5.2                   | 29.0    | 11.6    | 2.92     | 1                       |                                  | Smolt                   |
| Satterfield and Finney 2002 |         | HIDDEN 2         | Hidden Lake      | 58.230   | -152.420  | AK          | 1997-00-00   | Scale    |             |                            |         |         |          |                                         | -26.8                      | n          | 1.4            | -25.4                              | 6.3                   | 39.9    | 15.9    | 2.92     | 1                       |                                  | Smolt                   |
| Satterfield and Finney 2002 |         | HIDDEN 4         | Hidden Lake      | 58.230   | -152.420  | AK          | 1997-00-00   | Scale    |             |                            |         |         |          |                                         | -27.3                      | n          | 1.4            | -25.8                              | 5.2                   | 35.4    | 14.1    | 2.93     | 1                       |                                  | Smolt                   |
| Satterfield and Finney 2002 |         | KARLUK-SC-22-S.S | Karluk Lake      | 57.250   | -154.050  | AK          | 1997-00-00   | Scale    |             |                            |         |         |          |                                         | -21.2                      | n          | 1.4            | -19.8                              | 16.2                  | 26.6    | 9.2     | 3.37     | 1                       |                                  | Smolt                   |
| Overman et al. 2009         |         | NA               | Lake Sammamish   | 47.609   | -122.089  | WA          | 2003-01-01   | Muscle   |             |                            |         |         |          | -33.8                                   | *-30.1                     | n          | 1.9            | -28.2                              | 15.1                  |         |         |          | 1                       |                                  |                         |
| Overman et al. 2009         |         | NA               | Lake Sammamish   | 47.609   | -122.089  | WA          | 2003-01-01   | Muscle   |             |                            |         |         |          | -33.3                                   | *-29.6                     | n          | 1.9            | -27.7                              | 15.2                  |         |         |          | 1                       |                                  |                         |
| Overman et al. 2009         |         | NA               | Lake Sammamish   | 47.609   | -122.089  | WA          | 2003-01-01   | Muscle   |             |                            |         |         |          | -33.2                                   | *-29.6                     | n          | 1.9            | -27.7                              | 15.1                  |         |         |          | 1                       |                                  |                         |
| Overman et al. 2009         |         | NA               | Lake Sammamish   | 47.609   | -122.089  | WA          | 2003-01-01   | Muscle   |             |                            |         |         |          | -32.9                                   | *-29.2                     | n          | 1.9            | -27.3                              | 15.1                  |         |         |          | 1                       |                                  |                         |
| Overman et al. 2009         |         | NA               | Lake Sammamish   | 47.609   | -122.089  | WA          | 2003-01-01   | Muscle   |             |                            |         |         |          | -31.9                                   | *-28.2                     | n          | 1.9            | -26.3                              | 15.1                  |         |         |          | 1                       |                                  |                         |
| Overman et al. 2009         |         | NA               | Lake Sammamish   | 47.609   | -122.089  | WA          | 2003-01-01   | Muscle   |             |                            |         |         |          | -31.2                                   | *-27.5                     | n          | 1.9            | -25.6                              | 15.3                  |         |         |          | 1                       |                                  |                         |
| Overman et al. 2009         |         | NA               | Lake Sammamish   | 47.609   | -122.089  | WA          | 2003-01-01   | Muscle   |             |                            |         |         |          | -30.1                                   | *-26.4                     | n          | 1.9            | -24.5                              | 15.1                  |         |         |          | 1                       |                                  |                         |
| Overman et al. 2009         |         | NA               | Lake Sammamish   | 47.609   | -122.089  | WA          | 2003-01-01   | Muscle   |             |                            |         |         |          | -29.8                                   | *-26.1                     | n          | 1.9            | -24.2                              | 16.0                  |         |         |          | 1                       |                                  |                         |
| Overman et al. 2009         |         | NA               | Lake Sammamish   | 47.609   | -122.089  | WA          | 2003-01-01   | Muscle   |             |                            |         |         |          | -29.5                                   | *-25.8                     | n          | 1.9            | -23.9                              | 15.0                  |         |         |          | 1                       |                                  |                         |
| Overman et al. 2009         |         | NA               | Lake Sammamish   | 47.609   | -122.089  | WA          | 2003-01-01   | Muscle   |             |                            |         |         |          | -29.5                                   | *-25.8                     | n          | 1.9            | -23.9                              | 16.2                  |         |         |          | 1                       |                                  |                         |
| Overman et al. 2009         |         | NA               | Lake Sammamish   | 47.609   | -122.089  | WA          | 2003-01-01   | Muscle   |             |                            |         |         |          | -29.5                                   | *-25.8                     | n          | 1.9            | -23.9                              | 15.0                  |         |         |          | 1                       |                                  |                         |
| Overman et al. 2009         |         | NA               | Lake Sammamish   | 47.609   | -122.089  | WA          | 2003-01-01   | Muscle   |             |                            |         |         |          | -29.3                                   | *-25.6                     | n          | 1.9            | -23.7                              | 16.1                  |         |         |          | 1                       |                                  |                         |
| Overman et al. 2009         |         | NA               | Lake Sammamish   | 47.609   | -122.089  | WA          | 2003-01-01   | Muscle   |             |                            |         |         |          | -29.1                                   | *-25.5                     | n          | 1.9            | -23.6                              | 14.1                  |         |         |          | 1                       |                                  |                         |
| Overman et al. 2009         |         | NA               | Lake Sammamish   | 47.609   | -122.089  | WA          | 2003-01-01   | Muscle   |             |                            |         |         |          | -28.0                                   | *-24.3                     | n          | 1.9            | -22.4                              | 15.3                  |         |         |          | 1                       |                                  |                         |
| Overman et al. 2009         |         | NA               | Lake Sammamish   | 47.609   | -122.089  | WA          | 2003-01-01   | Muscle   |             |                            |         |         |          | -28.0                                   | *-24.3                     | n          | 1.9            | -22.4                              | 14.7                  |         |         |          | 1                       |                                  |                         |
| Overman et al. 2009         |         | NA               | Lake Sammamish   | 47.609   | -122.089  | WA          | 2003-01-01   | Muscle   |             |                            |         |         |          | -27.7                                   | *-24.0                     | n          | 1.9            | -22.1                              | 13.4                  |         |         |          | 1                       |                                  |                         |
| Overman et al. 2009         |         | NA               | Lake Sammamish   | 47.609   | -122.089  | WA          | 2003-01-01   | Muscle   |             |                            |         |         |          | -27.5                                   | *-23.9                     | n          | 1.9            | -22.0                              | 13.9                  |         |         |          | 1                       |                                  |                         |
| Satterfield and Finney 2002 |         | LAURA-SC-5-S.S   | Laura Lake       | 58.380   | -152.300  | AK          | 1997-00-00   | Scale    |             |                            |         |         |          |                                         | -15.4                      | n          | 1.4            | -14.0                              | 15.0                  | 24.3    | 8.6     | 3.29     | 1                       |                                  | Smolt                   |
| Satterfield and Finney 2002 |         | LAURA-SC-10-S.S  | Laura Lake       | 58.380   | -152.300  | AK          | 1997-00-00   | Scale    |             |                            |         |         |          |                                         | -24.8                      | n          | 1.4            | -23.3                              | 10.9                  | 26.3    | 9.2     | 3.32     | 1                       |                                  | Smolt                   |
| Satterfield and Finney 2002 |         | SPIR-SC-12-S.S   | Spiridon Lake    | 57.410   | -153.290  | AK          | 1997-00-00   | Scale    |             |                            |         |         |          |                                         | -25.5                      | n          | 1.4            | -24.0                              | 10.5                  | 29.2    | 10.4    | 3.26     | 1                       |                                  | Smolt                   |
| Satterfield and Finney 2002 |         | SPIR-SC-1-S.S    | Spiridon Lake    | 57.410   | -153.290  | AK          | 1997-00-00   | Scale    |             |                            |         |         |          |                                         | -24.8                      | n          | 1.4            | -23.4                              | 10.0                  | 28.3    | 10.1    | 3.27     | 1                       |                                  | Smolt                   |
| B. Finney Unpublished       |         | WEN-SC-8         | Wenatchee Lake   | 47.826   | -120.776  | WA          | 1997-00-00   | Scale    |             |                            |         |         |          |                                         | -26.5                      | n          | 1.4            | -25.1                              | 7.6                   | 25.7    | 10.2    | 2.93     | 1                       |                                  | Smolt                   |
| B. Finney Unpublished       |         | WEN-SC-4         | Wenatchee Lake   | 47.826   | -120.776  | WA          | 1997-00-00   | Scale    |             |                            |         |         |          |                                         | -27.4                      | n          | 1.4            | -26.0                              | 6.5                   | 25.8    | 10.3    | 2.94     | 1                       |                                  | Smolt                   |
| B. Finney Unpublished       |         | WEN-SC-10        | Wenatchee Lake   | 47.826   | -120.776  | WA          | 1997-00-00   | Scale    |             |                            |         |         |          |                                         | -25.6                      | n          | 1.4            | -24.2                              | 7.0                   | 24.3    | 9.3     | 3.03     | 1                       |                                  | Smolt                   |
| B. Finney Unpublished       |         | WEN-SC-11        | Wenatchee Lake   | 47.826   | -120.776  | WA          | 1997-00-00   | Scale    |             |                            |         |         |          |                                         | -26.2                      | n          | 1.4            | -24.7                              | 7.6                   | 25.1    | 9.5     | 3.10     | 1                       |                                  | Smolt                   |
| B. Finney Unpublished       |         | WEN-SC-14        | Wenatchee Lake   | 47.826   | -120.776  | WA          | 1997-00-00   | Scale    |             |                            |         |         |          |                                         | -26.4                      | n          | 1.4            | -24.9                              | 7.3                   | 23.2    | 8.6     | 3.13     | 1                       |                                  | Smolt                   |
| Welch and Parsons 1993      |         | NA               | Adams Lake       | 51.180   | -119.574  | BC          | 1991-00-00   | Muscle   |             |                            |         |         |          | -20.9                                   | *-17.2                     | n          | 0.6            | -16.6                              | 11.6                  |         |         |          | 2                       |                                  |                         |
| Welch and Parsons 1993      |         | NA               | Adams Lake       | 51.180   | -119.574  | BC          | 1991-00-00   | Muscle   |             |                            |         |         |          | -20.6                                   | *-16.9                     | n          | 0.6            | -16.3                              | 11.1                  |         |         |          | 2                       |                                  |                         |
| Welch and Parsons 1993      |         | NA               | Adams Lake       | 51.180   | -119.574  | BC          | 1991-00-00   | Muscle   |             |                            |         |         |          | -20.5                                   | *-16.8                     | n          | 0.6            | -16.2                              | 11.5                  |         |         |          | 2                       |                                  |                         |
| Welch and Parsons 1993      |         | NA               | Adams Lake       | 51.180   | -119.574  | BC          | 1991-00-00   | Muscle   |             |                            |         |         |          | -20.5                                   | *-16.8                     | n          | 0.6            | -16.2                              | 11.9                  |         |         |          | 2                       |                                  |                         |
| Welch and Parsons 1993      |         | NA               | Adams Lake       | 51.180   | -119.574  | BC          | 1991-00-00   | Muscle   |             |                            |         |         |          | -20.0                                   | *-16.3                     | n          | 0.6            | -15.7                              | 11.5                  |         |         |          | 2                       |                                  |                         |
| Welch and Parsons 1993      |         | NA               | Adams Lake       | 51.180   | -119.574  | BC          | 1991-00-00   | Muscle   |             |                            |         |         |          | -20.0                                   | *-16.3                     | n          | 0.6            | -15.7                              | 11.9                  |         |         |          | 2                       |                                  |                         |
| Welch and Parsons 1993      |         | NA               | Adams Lake       | 51.180   | -119.574  | BC          | 1991-00-00   | Muscle   |             |                            |         |         |          | -20.0                                   | *-16.3                     | n          | 0.6            | -15.7                              | 11.1                  |         |         |          | 2                       |                                  |                         |
| Welch and Parsons 1993      |         | NA               | Adams Lake       | 51.180   | -119.574  | BC          | 1991-00-00   | Muscle   |             |                            |         |         |          | -19.9                                   | *-16.2                     | n          | 0.6            | -15.6                              | 12.4                  |         |         |          | 2                       |                                  |                         |
| Welch and Parsons 1993      |         | NA               | Adams Lake       | 51.180   | -119.574  | BC          | 1991-00-00   | Muscle   |             |                            |         |         |          | -19.8                                   | *-16.1                     | n          | 0.6            | -15.5                              | 12.3                  |         |         |          | 2                       |                                  |                         |
| Welch and Parsons 1993      |         | NA               | Adams Lake       | 51.180   | -119.574  | BC          | 1991-00-00   | Muscle   |             |                            |         |         |          | -19.8                                   | *-16.1                     | n          | 0.6            | -15.5                              | 11.9                  |         |         |          | 2                       |                                  |                         |
| Welch and Parsons 1993      |         | NA               | Adams Lake       | 51.180   | -119.574  | BC          | 1991-00-00   | Muscle   |             |                            |         |         |          | -19.6                                   | *-15.9                     | n          | 0.6            | -15.3                              | 11.8                  |         |         |          | 2                       |                                  |                         |

| Source/Donor                | Lab No. | Cat No     | Site Name               | Latitude | Longitude | Prov. State | Capture Date | Material | Col. Yld. % | Mus. $\delta^{13}\text{C}$ | Mus. %C | Mus. %N | Mus. C:N | Mus. $\delta^{13}\text{C}$ , lipid cor. | Col. $\delta^{13}\text{C}$ | Form. cor. | Suess cor. (‰) | $\delta^{13}\text{C}_{\text{cor}}$ | $\delta^{15}\text{N}$ | Col. %C | Col. %N | Col. C:N | <i>A priori</i> ecotype | $\delta^{13}\text{C}$ ecotype ID | Notes |  |
|-----------------------------|---------|------------|-------------------------|----------|-----------|-------------|--------------|----------|-------------|----------------------------|---------|---------|----------|-----------------------------------------|----------------------------|------------|----------------|------------------------------------|-----------------------|---------|---------|----------|-------------------------|----------------------------------|-------|--|
| Welch and Parsons 1993      |         | NA         | Adams Lake              | 51.180   | -119.574  | BC          | 1991-00-00   | Muscle   |             |                            |         |         |          | -19.3                                   | *-15.6                     | n          | 0.6            | -15.0                              | 12.2                  |         |         |          | 2                       |                                  |       |  |
| Molkentin et al. 2015       |         | 58/11      | Alaska Pacific Region   | Unknown  | Unknown   |             | 2011-00-00   | Muscle   |             |                            |         |         |          | -21.1                                   | *-17.4                     | n          | 1.1            | -16.3                              | 10.5                  |         |         |          | 2                       |                                  |       |  |
| Molkentin et al. 2015       |         | 39/10      | Alaska Pacific Region   | Unknown  | Unknown   |             | 2011-00-00   | Muscle   |             |                            |         |         |          | -21.0                                   | *-17.3                     | n          | 1.1            | -16.2                              | 10.8                  |         |         |          | 2                       |                                  |       |  |
| Molkentin et al. 2015       |         | 40/10      | Alaska Pacific Region   | Unknown  | Unknown   |             | 2011-00-00   | Muscle   |             |                            |         |         |          | -20.9                                   | *-17.2                     | n          | 1.1            | -16.1                              | 11.0                  |         |         |          | 2                       |                                  |       |  |
| Molkentin et al. 2015       |         | 57/11      | Alaska Pacific Region   | Unknown  | Unknown   |             | 2011-00-00   | Muscle   |             |                            |         |         |          | -20.8                                   | *-17.1                     | n          | 1.1            | -16.0                              | 10.9                  |         |         |          | 2                       |                                  |       |  |
| Molkentin et al. 2015       |         | 38/10      | Alaska Pacific Region   | Unknown  | Unknown   |             | 2011-00-00   | Muscle   |             |                            |         |         |          | -20.6                                   | *-17.0                     | n          | 1.1            | -15.9                              | 11.0                  |         |         |          | 2                       |                                  |       |  |
| Molkentin et al. 2015       |         | 02/12      | Alaska Pacific Region   | Unknown  | Unknown   |             | 2011-00-00   | Muscle   |             |                            |         |         |          | -20.6                                   | *-16.9                     | n          | 1.1            | -15.8                              | 11.1                  |         |         |          | 2                       |                                  |       |  |
| Molkentin et al. 2015       |         | 115/11     | Alaska Pacific Region   | Unknown  | Unknown   |             | 2011-00-00   | Muscle   |             |                            |         |         |          | -20.6                                   | *-16.9                     | n          | 1.1            | -15.8                              | 10.7                  |         |         |          | 2                       |                                  |       |  |
| Molkentin et al. 2015       |         | 206/11     | Alaska Pacific Region   | Unknown  | Unknown   |             | 2011-00-00   | Muscle   |             |                            |         |         |          | -20.6                                   | *-16.9                     | n          | 1.1            | -15.8                              | 11.0                  |         |         |          | 2                       |                                  |       |  |
| Molkentin et al. 2015       |         | 02/11      | Alaska Pacific Region   | Unknown  | Unknown   |             | 2011-00-00   | Muscle   |             |                            |         |         |          | -20.5                                   | *-16.8                     | n          | 1.1            | -15.7                              | 10.8                  |         |         |          | 2                       |                                  |       |  |
| Molkentin et al. 2015       |         | 71/11      | Alaska Pacific Region   | Unknown  | Unknown   |             | 2011-00-00   | Muscle   |             |                            |         |         |          | -20.4                                   | *-16.8                     | n          | 1.1            | -15.7                              | 11.2                  |         |         |          | 2                       |                                  |       |  |
| Molkentin et al. 2015       |         | 69/11      | Alaska Pacific Region   | Unknown  | Unknown   |             | 2011-00-00   | Muscle   |             |                            |         |         |          | -20.4                                   | *-16.7                     | n          | 1.1            | -15.7                              | 10.6                  |         |         |          | 2                       |                                  |       |  |
| Molkentin et al. 2015       |         | 60/11      | Alaska Pacific Region   | Unknown  | Unknown   |             | 2011-00-00   | Muscle   |             |                            |         |         |          | -20.4                                   | *-16.7                     | n          | 1.1            | -15.6                              | 11.0                  |         |         |          | 2                       |                                  |       |  |
| Molkentin et al. 2015       |         | 153/11     | Alaska Pacific Region   | Unknown  | Unknown   |             | 2011-00-00   | Muscle   |             |                            |         |         |          | -20.2                                   | *-16.5                     | n          | 1.1            | -15.4                              | 10.4                  |         |         |          | 2                       |                                  |       |  |
| Molkentin et al. 2015       |         | 164/11     | Alaska Pacific Region   | Unknown  | Unknown   |             | 2011-00-00   | Muscle   |             |                            |         |         |          | -20.1                                   | *-16.4                     | n          | 1.1            | -15.3                              | 11.2                  |         |         |          | 2                       |                                  |       |  |
| Molkentin et al. 2015       |         | 36/10      | Alaska Pacific Region   | Unknown  | Unknown   |             | 2011-00-00   | Muscle   |             |                            |         |         |          | -20.1                                   | *-16.4                     | n          | 1.1            | -15.3                              | 11.9                  |         |         |          | 2                       |                                  |       |  |
| Molkentin et al. 2015       |         | 56/11      | Alaska Pacific Region   | Unknown  | Unknown   |             | 2011-00-00   | Muscle   |             |                            |         |         |          | -20.1                                   | *-16.4                     | n          | 1.1            | -15.3                              | 11.1                  |         |         |          | 2                       |                                  |       |  |
| Molkentin et al. 2015       |         | 205/11     | Alaska Pacific Region   | Unknown  | Unknown   |             | 2011-00-00   | Muscle   |             |                            |         |         |          | -20.0                                   | *-16.3                     | n          | 1.1            | -15.2                              | 10.8                  |         |         |          | 2                       |                                  |       |  |
| Molkentin et al. 2015       |         | 59/11      | Alaska Pacific Region   | Unknown  | Unknown   |             | 2011-00-00   | Muscle   |             |                            |         |         |          | -20.0                                   | *-16.3                     | n          | 1.1            | -15.2                              | 11.4                  |         |         |          | 2                       |                                  |       |  |
| Molkentin et al. 2015       |         | 03/12      | Alaska Pacific Region   | Unknown  | Unknown   |             | 2011-00-00   | Muscle   |             |                            |         |         |          | -19.8                                   | *-16.1                     | n          | 1.1            | -15.1                              | 11.4                  |         |         |          | 2                       |                                  |       |  |
| Molkentin et al. 2015       |         | 01/11      | Alaska Pacific Region   | Unknown  | Unknown   |             | 2011-00-00   | Muscle   |             |                            |         |         |          | -19.8                                   | *-16.1                     | n          | 1.1            | -15.1                              | 10.7                  |         |         |          | 2                       |                                  |       |  |
| Qin and Kaeriyama 2016      |         | 26         | Aleutian Islands Waters | 47.000   | 174.010   |             | 2009-00-00   | Muscle   |             |                            | 46.7    | 14.9    | 3.6      | -20.7                                   | *-17.0                     | n          | 1.0            | -16.0                              | 11.4                  |         |         |          | 2                       |                                  |       |  |
| Qin and Kaeriyama 2016      |         | 30         | Aleutian Islands Waters | 47.000   | 174.010   |             | 2009-00-00   | Muscle   |             |                            | 45.8    | 14.6    | 3.7      | -20.7                                   | *-17.0                     | n          | 1.0            | -16.0                              | 10.9                  |         |         |          | 2                       |                                  |       |  |
| Qin and Kaeriyama 2016      |         | 28         | Aleutian Islands Waters | 47.000   | 174.010   |             | 2009-00-00   | Muscle   |             |                            | 48.2    | 14.9    | 3.8      | -20.6                                   | *-16.9                     | n          | 1.0            | -15.9                              | 11.9                  |         |         |          | 2                       |                                  |       |  |
| Qin and Kaeriyama 2016      |         | 31         | Aleutian Islands Waters | 47.000   | 174.010   |             | 2009-00-00   | Muscle   |             |                            | 46.0    | 15.0    | 3.6      | -20.1                                   | *-16.4                     | n          | 1.0            | -15.3                              | 12.7                  |         |         |          | 2                       |                                  |       |  |
| Qin and Kaeriyama 2016      |         | 29         | Aleutian Islands Waters | 47.000   | 174.010   |             | 2009-00-00   | Muscle   |             |                            | 43.4    | 14.7    | 3.5      | -19.9                                   | *-16.3                     | n          | 1.0            | -15.2                              | 11.2                  |         |         |          | 2                       |                                  |       |  |
| Qin and Kaeriyama 2016      |         | 33         | Aleutian Islands Waters | 47.000   | 174.010   |             | 2009-00-00   | Muscle   |             |                            | 42.2    | 13.6    | 3.6      | -19.7                                   | *-16.0                     | n          | 1.0            | -15.0                              | 11.6                  |         |         |          | 2                       |                                  |       |  |
| Qin and Kaeriyama 2016      |         | 27         | Aleutian Islands Waters | 47.000   | 174.010   |             | 2009-00-00   | Muscle   |             |                            | 46.8    | 15.6    | 3.5      | -19.5                                   | *-15.8                     | n          | 1.0            | -14.8                              | 11.9                  |         |         |          | 2                       |                                  |       |  |
| Qin and Kaeriyama 2016      |         | 32         | Aleutian Islands Waters | 47.000   | 174.010   |             | 2009-00-00   | Muscle   |             |                            | 45.5    | 14.6    | 3.6      | -19.0                                   | *-15.3                     | n          | 1.0            | -14.3                              | 12.3                  |         |         |          | 2                       |                                  |       |  |
| Qin and Kaeriyama 2016      |         | 146        | Aleutian Islands Waters | 50.500   | -179.440  |             | 2010-00-00   | Muscle   |             |                            | 48.4    | 15.7    | 3.6      | -22.1                                   | *-18.4                     | n          | 1.1            | -17.4                              | 10.7                  |         |         |          | 2                       |                                  |       |  |
| Qin and Kaeriyama 2016      |         | 174        | Aleutian Islands Waters | 51.410   | -176.420  |             | 2010-00-00   | Muscle   |             |                            | 51.1    | 16.2    | 3.7      | -21.6                                   | *-17.9                     | n          | 1.1            | -16.9                              | 10.8                  |         |         |          | 2                       |                                  |       |  |
| Qin and Kaeriyama 2016      |         | 172        | Aleutian Islands Waters | 51.410   | -176.420  |             | 2010-00-00   | Muscle   |             |                            | 48.9    | 15.8    | 3.6      | -21.4                                   | *-17.7                     | n          | 1.1            | -16.6                              | 10.6                  |         |         |          | 2                       |                                  |       |  |
| Qin and Kaeriyama 2016      |         | 142        | Aleutian Islands Waters | 50.500   | -179.440  |             | 2010-00-00   | Muscle   |             |                            | 47.1    | 14.6    | 3.8      | -21.1                                   | *-17.4                     | n          | 1.1            | -16.4                              | 10.7                  |         |         |          | 2                       |                                  |       |  |
| Qin and Kaeriyama 2016      |         | 119        | Aleutian Islands Waters | 49.040   | -173.550  |             | 2010-00-00   | Muscle   |             |                            | 48.0    | 15.9    | 3.5      | -21.1                                   | *-17.4                     | n          | 1.1            | -16.4                              | 10.4                  |         |         |          | 2                       |                                  |       |  |
| Qin and Kaeriyama 2016      |         | 143        | Aleutian Islands Waters | 50.500   | -179.440  |             | 2010-00-00   | Muscle   |             |                            | 29.2    | 9.2     | 3.7      | -21.1                                   | *-17.4                     | n          | 1.1            | -16.3                              | 10.3                  |         |         |          | 2                       |                                  |       |  |
| Qin and Kaeriyama 2016      |         | 122        | Aleutian Islands Waters | 50.020   | -165.000  |             | 2010-00-00   | Muscle   |             |                            | 49.3    | 15.7    | 3.7      | -21.0                                   | *-17.3                     | n          | 1.1            | -16.2                              | 10.8                  |         |         |          | 2                       |                                  |       |  |
| Qin and Kaeriyama 2016      |         | 144        | Aleutian Islands Waters | 50.500   | -179.440  |             | 2010-00-00   | Muscle   |             |                            | 42.6    | 14.0    | 3.5      | -20.9                                   | *-17.2                     | n          | 1.1            | -16.2                              | 11.4                  |         |         |          | 2                       |                                  |       |  |
| Qin and Kaeriyama 2016      |         | 173        | Aleutian Islands Waters | 51.410   | -176.420  |             | 2010-00-00   | Muscle   |             |                            | 45.5    | 14.6    | 3.6      | -20.6                                   | *-16.9                     | n          | 1.1            | -15.8                              | 11.0                  |         |         |          | 2                       |                                  |       |  |
| Qin and Kaeriyama 2016      |         | 120        | Aleutian Islands Waters | 50.020   | -165.000  |             | 2010-00-00   | Muscle   |             |                            | 49.4    | 15.4    | 3.7      | -20.6                                   | *-16.9                     | n          | 1.1            | -15.8                              | 11.0                  |         |         |          | 2                       |                                  |       |  |
| Qin and Kaeriyama 2016      |         | 175        | Aleutian Islands Waters | 51.410   | -176.420  |             | 2010-00-00   | Muscle   |             |                            | 46.0    | 15.5    | 3.5      | -20.4                                   | *-16.7                     | n          | 1.1            | -15.7                              | 11.4                  |         |         |          | 2                       |                                  |       |  |
| Qin and Kaeriyama 2016      |         | 165        | Aleutian Islands Waters | 51.090   | -179.430  |             | 2010-00-00   | Muscle   |             |                            | 48.8    | 15.8    | 3.6      | -20.3                                   | *-16.6                     | n          | 1.1            | -15.5                              | 11.8                  |         |         |          | 2                       |                                  |       |  |
| Qin and Kaeriyama 2016      |         | 145        | Aleutian Islands Waters | 50.500   | -179.440  |             | 2010-00-00   | Muscle   |             |                            | 50.1    | 15.7    | 3.7      | -20.3                                   | *-16.6                     | n          | 1.1            | -15.5                              | 11.4                  |         |         |          | 2                       |                                  |       |  |
| Qin and Kaeriyama 2016      |         | 176        | Aleutian Islands Waters | 51.410   | -176.420  |             | 2010-00-00   | Muscle   |             |                            | 52.6    | 16.3    | 3.8      | -19.8                                   | *-16.1                     | n          | 1.1            | -15.1                              | 11.8                  |         |         |          | 2                       |                                  |       |  |
| Satterfield and Finney 2002 |         | AUKE-RS12  | Auke Lake               | 58.380   | -134.390  | AK          | 1997-00-00   | Muscle   |             |                            | -20.6   | 48.5    | 15.0     | 3.2                                     | -21.7                      | *-18.0     | n              | 0.7                                | -17.2                 | 10.5    |         |          |                         | 2                                |       |  |
| Satterfield and Finney 2002 |         | AUKE-RS18  | Auke Lake               | 58.380   | -134.390  | AK          | 1997-00-00   | Muscle   |             |                            | -21.2   | 48.9    | 15.0     | 3.3                                     | -22.2                      | *-18.5     | n              | 0.7                                | -17.7                 | 11.0    |         |          |                         | 2                                |       |  |
| Satterfield and Finney 2002 |         | AUKE-RS5   | Auke Lake               | 58.380   | -134.390  | AK          | 1997-00-00   | Muscle   |             |                            | -21.1   | 48.4    | 14.7     | 3.3                                     | -22.1                      | *-18.4     | n              | 0.7                                | -17.7                 | 10.6    |         |          |                         | 2                                |       |  |
| Satterfield and Finney 2002 |         | BECH-10-97 | Beacharof Lake          | 57.500   | -156.070  | AK          | 1997-00-00   | Muscle   |             |                            | -20.4   | 52.5    | 15.8     | 3.3                                     | -21.3                      | *-17.7     | n              | 0.7                                | -16.9                 | 10.4    |         |          |                         | 2                                |       |  |
| Satterfield and Finney 2002 |         | BECH-5-97  | Beacharof Lake          | 57.500   | -156.070  | AK          | 1997-00-00   | Muscle   |             |                            | -20.4   | 54.1    | 16.3     | 3.3                                     | -21.3                      | *-17.6     | n              | 0.7                                | -16.9                 | 11.3    |         |          |                         | 2                                |       |  |
| Satterfield and Finney 2002 |         | BECH-8-97  | Beacharof Lake          | 57.500   | -156.070  | AK          | 1997-00-00   | Muscle   |             |                            | -20.4   | 59.4    | 17.8     | 3.3                                     | -21.3                      | *-17.6     | n              | 0.7                                | -16.9                 | 11.0    |         |          |                         | 2                                |       |  |
| Satterfield and Finney 2002 |         | BECH-4-97  | Beacharof Lake          | 57.500   | -156.070  | AK          | 1997-00-00   | Muscle   |             |                            | -20.1   | 52.1    | 15.3     | 3.4                                     | -20.9                      | *-17.2     | n              | 0.7                                | -16.5                 | 11.0    |         |          |                         | 2                                |       |  |

| Source/Donor                | Lab No. | Cat No      | Site Name      | Latitude | Longitude | Prov. State | Capture Date | Material | Col. Yld. % | Mus. $\delta^{13}\text{C}$ | Mus. %C | Mus. %N | Mus. C:N | Mus. $\delta^{13}\text{C}$ , lipid cor. | Col. $\delta^{13}\text{C}$ | Form. cor. | Suess cor. (‰) | $\delta^{13}\text{C}_{\text{cor}}$ | $\delta^{15}\text{N}$ | Col. %C | Col. %N | Col. C:N | <i>A priori</i> ecotype | $\delta^{13}\text{C}$ ecotype ID | Notes            |
|-----------------------------|---------|-------------|----------------|----------|-----------|-------------|--------------|----------|-------------|----------------------------|---------|---------|----------|-----------------------------------------|----------------------------|------------|----------------|------------------------------------|-----------------------|---------|---------|----------|-------------------------|----------------------------------|------------------|
| Satterfield and Finney 2002 |         | BECH-9-97   | Beacharof Lake | 57.500   | -156.070  | AK          | 1997-00-00   | Muscle   |             | -20.2                      | 52.4    | 15.4    | 3.4      | -21.0                                   | *-17.3                     | n          | 0.7            | -16.6                              | 10.9                  |         |         |          | 2                       |                                  |                  |
| Satterfield and Finney 2002 |         | BECH-603-98 | Beacharof Lake | 57.500   | -156.070  | AK          | 1998-00-00   | Muscle   |             | -20.2                      | 48.1    | 14.1    | 3.4      | -20.9                                   | *-17.3                     | n          | 0.8            | -16.5                              | 11.3                  |         |         |          | 2                       |                                  |                  |
| Satterfield and Finney 2002 |         | BECH-609-98 | Beacharof Lake | 57.500   | -156.070  | AK          | 1998-00-00   | Muscle   |             | -20.4                      | 48.7    | 14.2    | 3.4      | -21.2                                   | *-17.5                     | n          | 0.8            | -16.8                              | 11.4                  |         |         |          | 2                       |                                  |                  |
| Satterfield and Finney 2002 |         | BECH-695-98 | Beacharof Lake | 57.500   | -156.070  | AK          | 1998-00-00   | Muscle   |             | -20.5                      | 49.4    | 14.4    | 3.4      | -21.3                                   | *-17.6                     | n          | 0.8            | -16.8                              | 11.2                  |         |         |          | 2                       |                                  |                  |
| Satterfield and Finney 2002 |         | BECH-680-98 | Beacharof Lake | 57.500   | -156.070  | AK          | 1998-00-00   | Muscle   |             | -21.0                      | 49.4    | 14.4    | 3.4      | -21.8                                   | *-18.1                     | n          | 0.8            | -17.3                              | 11.3                  |         |         |          | 2                       |                                  |                  |
| Satterfield and Finney 2002 |         | BECH-611-98 | Beacharof Lake | 57.500   | -156.070  | AK          | 1998-00-00   | Muscle   |             | -20.4                      | 48.7    | 14.1    | 3.4      | -21.2                                   | *-17.5                     | n          | 0.8            | -16.7                              | 11.3                  |         |         |          | 2                       |                                  |                  |
| Satterfield and Finney 2002 |         | BECH-675-98 | Beacharof Lake | 57.500   | -156.070  | AK          | 1998-00-00   | Muscle   |             | -20.8                      | 48.5    | 14.0    | 3.5      | -21.5                                   | *-17.9                     | n          | 0.8            | -17.1                              | 11.3                  |         |         |          | 2                       |                                  |                  |
| Satterfield and Finney 2002 |         | BECH-681-98 | Beacharof Lake | 57.500   | -156.070  | AK          | 1998-00-00   | Muscle   |             | -21.2                      | 48.6    | 14.0    | 3.5      | -21.9                                   | *-18.2                     | n          | 0.8            | -17.4                              | 11.4                  |         |         |          | 2                       |                                  |                  |
| Satterfield and Finney 2002 |         | BECH-6-97   | Beacharof Lake | 57.500   | -156.070  | AK          | 1997-00-00   | Muscle   |             | -20.5                      | 56.2    | 16.2    | 3.5      | -21.2                                   | *-17.5                     | n          | 0.7            | -16.8                              | 11.6                  |         |         |          | 2                       |                                  |                  |
| Satterfield and Finney 2002 |         | BECH-735-98 | Beacharof Lake | 57.500   | -156.070  | AK          | 1998-00-00   | Muscle   |             | -21.0                      | 49.3    | 14.2    | 3.5      | -21.6                                   | *-17.9                     | n          | 0.8            | -17.2                              | 11.4                  |         |         |          | 2                       |                                  |                  |
| Satterfield and Finney 2002 |         | BECH-620-98 | Beacharof Lake | 57.500   | -156.070  | AK          | 1998-00-00   | Muscle   |             | -20.6                      | 49.2    | 14.1    | 3.5      | -21.3                                   | *-17.6                     | n          | 0.8            | -16.8                              | 10.7                  |         |         |          | 2                       |                                  |                  |
| Satterfield and Finney 2002 |         | BECH-605-98 | Beacharof Lake | 57.500   | -156.070  | AK          | 1998-00-00   | Muscle   |             | -20.7                      | 49.1    | 14.1    | 3.5      | -21.3                                   | *-17.6                     | n          | 0.8            | -16.9                              | 11.6                  |         |         |          | 2                       |                                  |                  |
| Satterfield and Finney 2002 |         | BECH-2-97   | Beacharof Lake | 57.500   | -156.070  | AK          | 1997-00-00   | Muscle   |             | -20.5                      | 62.2    | 17.8    | 3.5      | -21.2                                   | *-17.5                     | n          | 0.7            | -16.8                              | 11.2                  |         |         |          | 2                       |                                  |                  |
| Satterfield and Finney 2002 |         | BECH-645-98 | Beacharof Lake | 57.500   | -156.070  | AK          | 1998-00-00   | Muscle   |             | -20.4                      | 49.0    | 14.0    | 3.5      | -21.1                                   | *-17.4                     | n          | 0.8            | -16.7                              | 10.6                  |         |         |          | 2                       |                                  |                  |
| Satterfield and Finney 2002 |         | BECH-610-98 | Beacharof Lake | 57.500   | -156.070  | AK          | 1998-00-00   | Muscle   |             | -21.2                      | 48.9    | 14.0    | 3.5      | -21.9                                   | *-18.2                     | n          | 0.8            | -17.4                              | 11.3                  |         |         |          | 2                       |                                  |                  |
| Satterfield and Finney 2002 |         | BECH-608-98 | Beacharof Lake | 57.500   | -156.070  | AK          | 1998-00-00   | Muscle   |             | -21.1                      | 49.7    | 14.2    | 3.5      | -21.7                                   | *-18.0                     | n          | 0.8            | -17.3                              | 11.1                  |         |         |          | 2                       |                                  |                  |
| Satterfield and Finney 2002 |         | BECH-7-97   | Beacharof Lake | 57.500   | -156.070  | AK          | 1997-00-00   | Muscle   |             | -20.2                      | 57.7    | 16.4    | 3.5      | -20.8                                   | *-17.2                     | n          | 0.7            | -16.4                              | 11.3                  |         |         |          | 2                       |                                  |                  |
| Satterfield and Finney 2002 |         | BECH-601-98 | Beacharof Lake | 57.500   | -156.070  | AK          | 1998-00-00   | Muscle   |             | -20.7                      | 48.8    | 13.9    | 3.5      | -21.3                                   | *-17.6                     | n          | 0.8            | -16.8                              | 10.8                  |         |         |          | 2                       |                                  |                  |
| Satterfield and Finney 2002 |         | BECH-1-97   | Beacharof Lake | 57.500   | -156.070  | AK          | 1997-00-00   | Muscle   |             | -20.9                      | 52.1    | 14.8    | 3.5      | -21.5                                   | *-17.8                     | n          | 0.7            | -17.1                              | 11.1                  |         |         |          | 2                       |                                  |                  |
| Satterfield and Finney 2002 |         | BECH-607-98 | Beacharof Lake | 57.500   | -156.070  | AK          | 1998-00-00   | Muscle   |             | -20.9                      | 48.7    | 13.8    | 3.5      | -21.5                                   | *-17.8                     | n          | 0.8            | -17.1                              | 11.5                  |         |         |          | 2                       |                                  |                  |
| Satterfield and Finney 2002 |         | BECH-600-98 | Beacharof Lake | 57.500   | -156.070  | AK          | 1998-00-00   | Muscle   |             | -21.5                      | 50.1    | 14.2    | 3.5      | -22.1                                   | *-18.4                     | n          | 0.8            | -17.7                              | 10.6                  |         |         |          | 2                       |                                  |                  |
| Satterfield and Finney 2002 |         | BECH-3-97   | Beacharof Lake | 57.500   | -156.070  | AK          | 1997-00-00   | Muscle   |             | -21.7                      | 51.5    | 14.5    | 3.6      | -22.3                                   | *-18.6                     | n          | 0.7            | -17.8                              | 10.0                  |         |         |          | 2                       |                                  |                  |
| Satterfield and Finney 2002 |         | BECH-606-98 | Beacharof Lake | 57.500   | -156.070  | AK          | 1998-00-00   | Muscle   |             | -20.4                      | 49.6    | 13.8    | 3.6      | -20.9                                   | *-17.3                     | n          | 0.8            | -16.5                              | 11.5                  |         |         |          | 2                       |                                  |                  |
| Satterfield and Finney 2002 |         | BECH-604-98 | Beacharof Lake | 57.500   | -156.070  | AK          | 1998-00-00   | Muscle   |             | -20.4                      | 49.7    | 13.9    | 3.6      | -21.0                                   | *-17.3                     | n          | 0.8            | -16.5                              | 10.5                  |         |         |          | 2                       |                                  |                  |
| Satterfield and Finney 2002 |         | BECH-625-98 | Beacharof Lake | 57.500   | -156.070  | AK          | 1998-00-00   | Muscle   |             | -20.4                      | 49.9    | 13.7    | 3.6      | -20.9                                   | *-17.2                     | n          | 0.8            | -16.4                              | 11.7                  |         |         |          | 2                       |                                  |                  |
| Satterfield and Finney 2002 |         | BECH-602-98 | Beacharof Lake | 57.500   | -156.070  | AK          | 1998-00-00   | Muscle   |             | -20.2                      | 50.4    | 13.8    | 3.6      | -20.6                                   | *-16.9                     | n          | 0.8            | -16.2                              | 12.6                  |         |         |          | 2                       |                                  |                  |
| Satterfield and Finney 2002 |         | BEN-1       | Benzemen Lake  | 56.470   | -134.550  | AK          | 1996-00-00   | Muscle   |             | -20.9                      | 50.6    | 14.3    | 3.6      | -21.5                                   | *-17.8                     | n          | 0.7            | -17.1                              | 11.4                  |         |         |          | 2                       |                                  |                  |
| Satterfield and Finney 2002 |         | KAT-RS-6    | Chilkat Lake   | 59.150   | -125.530  | AK          | 1997-00-00   | Muscle   |             | -20.8                      | 46.4    | 14.3    | 3.3      | -21.9                                   | *-18.2                     | n          | 0.7            | -17.4                              | 10.8                  |         |         |          | 2                       |                                  |                  |
| Satterfield and Finney 2002 |         | KAT-RS-10   | Chilkat Lake   | 59.150   | -125.530  | AK          | 1997-00-00   | Muscle   |             | -21.0                      | 48.2    | 14.7    | 3.3      | -22.0                                   | *-18.3                     | n          | 0.7            | -17.5                              | 10.1                  |         |         |          | 2                       |                                  |                  |
| Satterfield and Finney 2002 |         | KAT-RS-2    | Chilkat Lake   | 59.150   | -125.530  | AK          | 1997-00-00   | Muscle   |             | -21.0                      | 47.9    | 14.2    | 3.4      | -21.8                                   | *-18.1                     | n          | 0.7            | -17.4                              | 10.5                  |         |         |          | 2                       |                                  |                  |
| Satterfield and Finney 2002 |         | KAT-17      | Chilkat Lake   | 59.150   | -125.530  | AK          | 1990-00-00   | Muscle   |             | -20.6                      | 53.2    | 11.7    | 4.5      | -20.0                                   | *-16.3                     | n          | 0.6            | -15.7                              | 12.4                  |         |         |          | 2                       |                                  |                  |
| Satterfield and Finney 2002 |         | KAT-11      | Chilkat Lake   | 59.150   | -125.530  | AK          | 1990-00-00   | Muscle   |             | -23.1                      | 54.6    | 10.6    | 5.2      | -22.1                                   | *-18.4                     | n          | 0.6            | -17.8                              | 10.9                  |         |         |          | 2                       |                                  |                  |
| Satterfield and Finney 2002 |         | KAT-24      | Chilkat Lake   | 59.150   | -125.530  | AK          | 1990-00-00   | Muscle   |             | -25.3                      | 58.9    | 7.1     | 8.4      | -23.0                                   | *-19.3                     | n          | 0.6            | -18.7                              | 11.4                  |         |         |          | 2                       |                                  | C:N unacceptable |
| Welch and Parsons 1993      |         | NA          | Chilko Lake    | 51.287   | -124.065  | BC          | 1991-00-00   | Muscle   |             |                            |         |         |          | -21.6                                   | *-17.9                     | n          | 0.6            | -17.3                              | 9.4                   |         |         |          | 2                       |                                  |                  |
| Welch and Parsons 1993      |         | NA          | Chilko Lake    | 51.287   | -124.065  | BC          | 1991-00-00   | Muscle   |             |                            |         |         |          | -21.1                                   | *-17.4                     | n          | 0.6            | -16.8                              | 9.5                   |         |         |          | 2                       |                                  |                  |
| Welch and Parsons 1993      |         | NA          | Chilko Lake    | 51.287   | -124.065  | BC          | 1991-00-00   | Muscle   |             |                            |         |         |          | -21.1                                   | *-17.4                     | n          | 0.6            | -16.7                              | 9.5                   |         |         |          | 2                       |                                  |                  |
| Welch and Parsons 1993      |         | NA          | Chilko Lake    | 51.287   | -124.065  | BC          | 1991-00-00   | Muscle   |             |                            |         |         |          | -20.8                                   | *-17.1                     | n          | 0.6            | -16.5                              | 10.1                  |         |         |          | 2                       |                                  |                  |
| Welch and Parsons 1993      |         | NA          | Chilko Lake    | 51.287   | -124.065  | BC          | 1991-00-00   | Muscle   |             |                            |         |         |          | -20.7                                   | *-17.0                     | n          | 0.6            | -16.4                              | 10.0                  |         |         |          | 2                       |                                  |                  |
| Welch and Parsons 1993      |         | NA          | Chilko Lake    | 51.287   | -124.065  | BC          | 1991-00-00   | Muscle   |             |                            |         |         |          | -20.7                                   | *-17.0                     | n          | 0.6            | -16.4                              | 10.5                  |         |         |          | 2                       |                                  |                  |
| Welch and Parsons 1993      |         | NA          | Chilko Lake    | 51.287   | -124.065  | BC          | 1991-00-00   | Muscle   |             |                            |         |         |          | -20.1                                   | *-16.4                     | n          | 0.6            | -15.8                              | 10.7                  |         |         |          | 2                       |                                  |                  |
| Welch and Parsons 1993      |         | NA          | Chilko Lake    | 51.287   | -124.065  | BC          | 1991-00-00   | Muscle   |             |                            |         |         |          | -20.1                                   | *-16.4                     | n          | 0.6            | -15.7                              | 11.1                  |         |         |          | 2                       |                                  |                  |
| Welch and Parsons 1993      |         | NA          | Chilko Lake    | 51.287   | -124.065  | BC          | 1991-00-00   | Muscle   |             |                            |         |         |          | -20.0                                   | *-16.3                     | n          | 0.6            | -15.7                              | 10.8                  |         |         |          | 2                       |                                  |                  |
| Welch and Parsons 1993      |         | NA          | Chilko Lake    | 51.287   | -124.065  | BC          | 1991-00-00   | Muscle   |             |                            |         |         |          | -19.9                                   | *-16.2                     | n          | 0.6            | -15.6                              | 11.1                  |         |         |          | 2                       |                                  |                  |
| Welch and Parsons 1993      |         | NA          | Chilko Lake    | 51.287   | -124.065  | BC          | 1991-00-00   | Muscle   |             |                            |         |         |          | -19.7                                   | *-16.0                     | n          | 0.6            | -15.4                              | 11.4                  |         |         |          | 2                       |                                  |                  |
| Welch and Parsons 1993      |         | NA          | Chilko Lake    | 51.287   | -124.065  | BC          | 1991-00-00   | Muscle   |             |                            |         |         |          | -19.5                                   | *-15.8                     | n          | 0.6            | -15.2                              | 11.3                  |         |         |          | 2                       |                                  |                  |
| Satterfield and Finney 2002 |         | KOOT-RS6    | Chilkoot Lake  | 59.210   | -135.500  | AK          | 1997-00-00   | Muscle   |             | -19.9                      | 47.5    | 14.8    | 3.2      | -21.1                                   | *-17.4                     | n          | 0.7            | -16.6                              | 10.9                  |         |         |          | 2                       |                                  |                  |
| Satterfield and Finney 2002 |         | KOOT-RS2    | Chilkoot Lake  | 59.210   | -135.500  | AK          | 1997-00-00   | Muscle   |             | -20.4                      | 48.4    | 14.9    | 3.3      | -21.5                                   | *-17.8                     | n          | 0.7            | -17.1                              | 10.5                  |         |         |          | 2                       |                                  |                  |
| Satterfield and Finney 2002 |         | KOOT-RS9    | Chilkoot Lake  | 59.210   | -135.500  | AK          | 1997-00-00   | Muscle   |             | -20.2                      | 49.8    | 14.8    | 3.4      | -21.1                                   | *-17.4                     | n          | 0.7            | -16.6                              | 11.6                  |         |         |          | 2                       |                                  |                  |
| Satterfield and Finney 2002 |         | KOOT-16     | Chilkoot Lake  | 59.210   | -135.500  | AK          | 1990-00-00   | Muscle   |             | -20.4                      | 49.7    | 14.1    | 3.5      | -21.0                                   | *-17.4                     | n          | 0.6            | -16.7                              | 11.1                  |         |         |          | 2                       |                                  |                  |
| Wang et al. 2018            |         | SP06        | Copper River   | 61.501   | -144.419  | AK          | 2016-00-00   | Muscle   |             |                            |         |         |          | -22.2                                   | *-18.5                     | n          | 1.2            | -17.3                              | 11.4                  |         |         |          | 2                       |                                  |                  |



| Source/Donor                | Lab No. | Cat No  | Site Name      | Latitude | Longitude | Prov. State | Capture Date | Material | Col. Yld. % | Mus. $\delta^{13}\text{C}$ | Mus. %C | Mus. %N | Mus. C:N | Mus. $\delta^{13}\text{C}$ , lipid cor. | Col. $\delta^{13}\text{C}$ | Form. cor. | Suess cor. (‰) | $\delta^{13}\text{C}_{\text{cor}}$ | $\delta^{15}\text{N}$ | Col. %C | Col. %N | Col. C:N | <i>A priori</i> ecotype | $\delta^{13}\text{C}$ ecotype ID | Notes |
|-----------------------------|---------|---------|----------------|----------|-----------|-------------|--------------|----------|-------------|----------------------------|---------|---------|----------|-----------------------------------------|----------------------------|------------|----------------|------------------------------------|-----------------------|---------|---------|----------|-------------------------|----------------------------------|-------|
| Wang et al. 2018            |         | SP02    | Copper River   | 61.501   | -144.419  | AK          | 2016-00-00   | Muscle   |             |                            |         |         |          | -22.0                                   | *-18.3                     | n          | 1.2            | -17.1                              | 10.7                  |         |         |          | 2                       |                                  |       |
| Wang et al. 2018            |         | SP03    | Copper River   | 61.501   | -144.419  | AK          | 2016-00-00   | Muscle   |             |                            |         |         |          | -21.9                                   | *-18.2                     | n          | 1.2            | -17.0                              | 10.6                  |         |         |          | 2                       |                                  |       |
| Wang et al. 2018            |         | SP07    | Copper River   | 61.501   | -144.419  | AK          | 2016-00-00   | Muscle   |             |                            |         |         |          | -21.9                                   | *-18.2                     | n          | 1.2            | -17.0                              | 11.4                  |         |         |          | 2                       |                                  |       |
| Wang et al. 2018            |         | SP01    | Copper River   | 61.501   | -144.419  | AK          | 2016-00-00   | Muscle   |             |                            |         |         |          | -21.6                                   | *-17.9                     | n          | 1.2            | -16.7                              | 11.0                  |         |         |          | 2                       |                                  |       |
| Satterfield and Finney 2002 |         | CRES-52 | Crescent Lake  | 60.220   | -152.560  | AK          | 1991-00-00   | Muscle   |             | -21.0                      | 47.6    | 14.3    | 3.3      | -21.9                                   | *-18.2                     | n          | 0.6            | -17.5                              | 10.2                  |         |         |          | 2                       |                                  |       |
| Satterfield and Finney 2002 |         | CRES-27 | Crescent Lake  | 60.220   | -152.560  | AK          | 1991-00-00   | Muscle   |             | -19.9                      | 47.8    | 14.3    | 3.4      | -20.8                                   | *-17.1                     | n          | 0.6            | -16.5                              | 10.0                  |         |         |          | 2                       |                                  |       |
| Satterfield and Finney 2002 |         | CRES-63 | Crescent Lake  | 60.220   | -152.560  | AK          | 1991-00-00   | Muscle   |             | -20.3                      | 49.2    | 13.5    | 3.7      | -20.8                                   | *-17.1                     | n          | 0.6            | -16.4                              | 10.9                  |         |         |          | 2                       |                                  |       |
| Welch and Parsons 1993      |         | NA      | Early Stewart  | 54.537   | -124.526  | BC          | 1991-00-00   | Muscle   |             |                            |         |         |          | -20.9                                   | *-17.2                     | n          | 0.6            | -16.6                              | 11.9                  |         |         |          | 2                       |                                  |       |
| Welch and Parsons 1993      |         | NA      | Early Stewart  | 54.537   | -124.526  | BC          | 1991-00-00   | Muscle   |             |                            |         |         |          | -20.7                                   | *-17.0                     | n          | 0.6            | -16.4                              | 12.6                  |         |         |          | 2                       |                                  |       |
| Welch and Parsons 1993      |         | NA      | Early Stewart  | 54.537   | -124.526  | BC          | 1991-00-00   | Muscle   |             |                            |         |         |          | -20.6                                   | *-16.9                     | n          | 0.6            | -16.3                              | 12.0                  |         |         |          | 2                       |                                  |       |
| Welch and Parsons 1993      |         | NA      | Early Stewart  | 54.537   | -124.526  | BC          | 1991-00-00   | Muscle   |             |                            |         |         |          | -20.5                                   | *-16.9                     | n          | 0.6            | -16.2                              | 12.5                  |         |         |          | 2                       |                                  |       |
| Welch and Parsons 1993      |         | NA      | Early Stewart  | 54.537   | -124.526  | BC          | 1991-00-00   | Muscle   |             |                            |         |         |          | -20.5                                   | *-16.8                     | n          | 0.6            | -16.2                              | 12.4                  |         |         |          | 2                       |                                  |       |
| Welch and Parsons 1993      |         | NA      | Early Stewart  | 54.537   | -124.526  | BC          | 1991-00-00   | Muscle   |             |                            |         |         |          | -20.5                                   | *-16.8                     | n          | 0.6            | -16.2                              | 12.6                  |         |         |          | 2                       |                                  |       |
| Welch and Parsons 1993      |         | NA      | Early Stewart  | 54.537   | -124.526  | BC          | 1991-00-00   | Muscle   |             |                            |         |         |          | -20.5                                   | *-16.8                     | n          | 0.6            | -16.2                              | 11.9                  |         |         |          | 2                       |                                  |       |
| Welch and Parsons 1993      |         | NA      | Early Stewart  | 54.537   | -124.526  | BC          | 1991-00-00   | Muscle   |             |                            |         |         |          | -20.5                                   | *-16.8                     | n          | 0.6            | -16.2                              | 12.4                  |         |         |          | 2                       |                                  |       |
| Welch and Parsons 1993      |         | NA      | Early Stewart  | 54.537   | -124.526  | BC          | 1991-00-00   | Muscle   |             |                            |         |         |          | -20.5                                   | *-16.8                     | n          | 0.6            | -16.1                              | 12.1                  |         |         |          | 2                       |                                  |       |
| Welch and Parsons 1993      |         | NA      | Early Stewart  | 54.537   | -124.526  | BC          | 1991-00-00   | Muscle   |             |                            |         |         |          | -20.3                                   | *-16.6                     | n          | 0.6            | -15.9                              | 12.6                  |         |         |          | 2                       |                                  |       |
| Welch and Parsons 1993      |         | NA      | Early Stewart  | 54.537   | -124.526  | BC          | 1991-00-00   | Muscle   |             |                            |         |         |          | -20.2                                   | *-16.5                     | n          | 0.6            | -15.9                              | 12.4                  |         |         |          | 2                       |                                  |       |
| Welch and Parsons 1993      |         | NA      | Early Stewart  | 54.537   | -124.526  | BC          | 1991-00-00   | Muscle   |             |                            |         |         |          | -20.1                                   | *-16.4                     | n          | 0.6            | -15.7                              | 11.4                  |         |         |          | 2                       |                                  |       |
| Satterfield and Finney 2002 |         | EVA-46  | Eva Lake       | 57.400   | -135.700  | AK          | 1995-00-00   | Muscle   |             | -20.6                      | 47.6    | 15.0    | 3.2      | -21.7                                   | *-18.1                     | n          | 0.7            | -17.4                              | 11.1                  |         |         |          | 2                       |                                  |       |
| Satterfield and Finney 2002 |         | EVA-10  | Eva Lake       | 57.400   | -135.700  | AK          | 1995-00-00   | Muscle   |             | -21.2                      | 48.6    | 14.3    | 3.4      | -22.0                                   | *-18.3                     | n          | 0.7            | -17.6                              | 11.0                  |         |         |          | 2                       |                                  |       |
| Satterfield and Finney 2002 |         | EVA-44  | Eva Lake       | 57.400   | -135.700  | AK          | 1995-00-00   | Muscle   |             | -20.8                      | 48.5    | 13.8    | 3.5      | -21.4                                   | *-17.7                     | n          | 0.7            | -17.0                              | 12.8                  |         |         |          | 2                       |                                  |       |
| Kaeriyama et al. 2004       |         | NA      | Gulf of Alaska | 50.560   | -145.000  |             | 1999-00-00   | Muscle   |             |                            |         |         |          | -21.6                                   | *-17.9                     | n          | 0.8            | -17.1                              | 11.7                  |         |         |          | 2                       |                                  |       |
| Kaeriyama et al. 2004       |         | NA      | Gulf of Alaska | 50.560   | -145.000  |             | 1999-00-00   | Muscle   |             |                            |         |         |          | -21.5                                   | *-17.8                     | n          | 0.8            | -17.0                              | 11.5                  |         |         |          | 2                       |                                  |       |
| Kaeriyama et al. 2004       |         | NA      | Gulf of Alaska | 50.560   | -145.000  |             | 1999-00-00   | Muscle   |             |                            |         |         |          | -21.3                                   | *-17.6                     | n          | 0.8            | -16.8                              | 10.7                  |         |         |          | 2                       |                                  |       |
| Kaeriyama et al. 2004       |         | NA      | Gulf of Alaska | 50.560   | -145.000  |             | 1999-00-00   | Muscle   |             |                            |         |         |          | -21.2                                   | *-17.5                     | n          | 0.8            | -16.7                              | 11.5                  |         |         |          | 2                       |                                  |       |
| Kaeriyama et al. 2004       |         | NA      | Gulf of Alaska | 50.560   | -145.000  |             | 1999-00-00   | Muscle   |             |                            |         |         |          | -21.2                                   | *-17.5                     | n          | 0.8            | -16.7                              | 12.7                  |         |         |          | 2                       |                                  |       |
| Kaeriyama et al. 2004       |         | NA      | Gulf of Alaska | 50.560   | -145.000  |             | 1999-00-00   | Muscle   |             |                            |         |         |          | -21.1                                   | *-17.4                     | n          | 0.8            | -16.6                              | 12.5                  |         |         |          | 2                       |                                  |       |
| Kaeriyama et al. 2004       |         | NA      | Gulf of Alaska | 50.560   | -145.000  |             | 1999-00-00   | Muscle   |             |                            |         |         |          | -20.9                                   | *-17.2                     | n          | 0.8            | -16.4                              | 11.3                  |         |         |          | 2                       |                                  |       |
| Kaeriyama et al. 2004       |         | NA      | Gulf of Alaska | 50.560   | -145.000  |             | 1999-00-00   | Muscle   |             |                            |         |         |          | -20.8                                   | *-17.1                     | n          | 0.8            | -16.3                              | 12.6                  |         |         |          | 2                       |                                  |       |
| Kaeriyama et al. 2004       |         | NA      | Gulf of Alaska | 50.560   | -145.000  |             | 1999-00-00   | Muscle   |             |                            |         |         |          | -20.7                                   | *-17.0                     | n          | 0.8            | -16.3                              | 11.9                  |         |         |          | 2                       |                                  |       |
| Kaeriyama et al. 2004       |         | NA      | Gulf of Alaska | 50.560   | -145.000  |             | 1999-00-00   | Muscle   |             |                            |         |         |          | -20.7                                   | *-17.0                     | n          | 0.8            | -16.2                              | 11.5                  |         |         |          | 2                       |                                  |       |
| Kaeriyama et al. 2004       |         | NA      | Gulf of Alaska | 50.560   | -145.000  |             | 1999-00-00   | Muscle   |             |                            |         |         |          | -20.7                                   | *-17.0                     | n          | 0.8            | -16.2                              | 11.7                  |         |         |          | 2                       |                                  |       |
| Kaeriyama et al. 2004       |         | NA      | Gulf of Alaska | 50.560   | -145.000  |             | 1999-00-00   | Muscle   |             |                            |         |         |          | -20.6                                   | *-17.0                     | n          | 0.8            | -16.2                              | 11.4                  |         |         |          | 2                       |                                  |       |
| Kaeriyama et al. 2004       |         | NA      | Gulf of Alaska | 50.560   | -145.000  |             | 1999-00-00   | Muscle   |             |                            |         |         |          | -20.5                                   | *-16.8                     | n          | 0.8            | -16.0                              | 11.3                  |         |         |          | 2                       |                                  |       |
| Kaeriyama et al. 2004       |         | NA      | Gulf of Alaska | 50.560   | -145.000  |             | 1999-00-00   | Muscle   |             |                            |         |         |          | -20.2                                   | *-16.5                     | n          | 0.8            | -15.7                              | 12.0                  |         |         |          | 2                       |                                  |       |
| Kaeriyama et al. 2004       |         | NA      | Gulf of Alaska | 50.560   | -145.000  |             | 1999-00-00   | Muscle   |             |                            |         |         |          | -20.0                                   | *-16.3                     | n          | 0.8            | -15.5                              | 11.3                  |         |         |          | 2                       |                                  |       |
| Kaeriyama et al. 2004       |         | NA      | Gulf of Alaska | 50.560   | -145.000  |             | 1999-00-00   | Muscle   |             |                            |         |         |          | -19.8                                   | *-16.1                     | n          | 0.8            | -15.3                              | 10.6                  |         |         |          | 2                       |                                  |       |
| Kaeriyama et al. 2004       |         | NA      | Gulf of Alaska | 50.560   | -145.000  |             | 1999-00-00   | Muscle   |             |                            |         |         |          | -19.6                                   | *-15.9                     | n          | 0.8            | -15.1                              | 11.2                  |         |         |          | 2                       |                                  |       |
| Kaeriyama et al. 2004       |         | NA      | Gulf of Alaska | 50.560   | -145.000  |             | 1999-00-00   | Muscle   |             |                            |         |         |          | -19.5                                   | *-15.8                     | n          | 0.8            | -15.0                              | 10.5                  |         |         |          | 2                       |                                  |       |
| Kaeriyama et al. 2004       |         | NA      | Gulf of Alaska | 50.560   | -145.000  |             | 2000-00-00   | Muscle   |             |                            |         |         |          | -20.7                                   | *-17.0                     | n          | 0.8            | -16.2                              | 10.4                  |         |         |          | 2                       |                                  |       |
| Kaeriyama et al. 2004       |         | NA      | Gulf of Alaska | 50.560   | -145.000  |             | 2000-00-00   | Muscle   |             |                            |         |         |          | -20.6                                   | *-16.9                     | n          | 0.8            | -16.1                              | 9.8                   |         |         |          | 2                       |                                  |       |
| Kaeriyama et al. 2004       |         | NA      | Gulf of Alaska | 50.560   | -145.000  |             | 2000-00-00   | Muscle   |             |                            |         |         |          | -19.7                                   | *-16.0                     | n          | 0.8            | -15.2                              | 11.0                  |         |         |          | 2                       |                                  |       |
| Kaeriyama et al. 2004       |         | NA      | Gulf of Alaska | 50.560   | -145.000  |             | 2000-00-00   | Muscle   |             |                            |         |         |          | -19.5                                   | *-15.8                     | n          | 0.8            | -15.0                              | 12.6                  |         |         |          | 2                       |                                  |       |
| Kaeriyama et al. 2004       |         | NA      | Gulf of Alaska | 50.560   | -145.000  |             | 2000-00-00   | Muscle   |             |                            |         |         |          | -19.5                                   | *-15.8                     | n          | 0.8            | -15.0                              | 10.1                  |         |         |          | 2                       |                                  |       |
| Kaeriyama et al. 2004       |         | NA      | Gulf of Alaska | 50.560   | -145.000  |             | 2000-00-00   | Muscle   |             |                            |         |         |          | -19.5                                   | *-15.8                     | n          | 0.8            | -15.0                              | 11.3                  |         |         |          | 2                       |                                  |       |
| Kaeriyama et al. 2004       |         | NA      | Gulf of Alaska | 50.560   | -145.000  |             | 2000-00-00   | Muscle   |             |                            |         |         |          | -19.4                                   | *-15.8                     | n          | 0.8            | -14.9                              | 12.2                  |         |         |          | 2                       |                                  |       |
| Kaeriyama et al. 2004       |         | NA      | Gulf of Alaska | 50.560   | -145.000  |             | 2000-00-00   | Muscle   |             |                            |         |         |          | -19.4                                   | *-15.7                     | n          | 0.8            | -14.9                              | 11.9                  |         |         |          | 2                       |                                  |       |
| Kaeriyama et al. 2004       |         | NA      | Gulf of Alaska | 50.560   | -145.000  |             | 2000-00-00   | Muscle   |             |                            |         |         |          | -19.4                                   | *-15.7                     | n          | 0.8            | -14.9                              | 11.3                  |         |         |          | 2                       |                                  |       |
| Kaeriyama et al. 2004       |         | NA      | Gulf of Alaska | 50.560   | -145.000  |             | 2000-00-00   | Muscle   |             |                            |         |         |          | -19.4                                   | *-15.7                     | n          | 0.8            | -14.9                              | 10.9                  |         |         |          | 2                       |                                  |       |

| Source/Donor                | Lab No. | Cat No      | Site Name       | Latitude | Longitude | Prov. State | Capture Date | Material        | Col. Yld. % | Mus. $\delta^{13}\text{C}$ | Mus. %C | Mus. %N | Mus. C:N | Mus. $\delta^{13}\text{C}$ , lipid cor. | Col. $\delta^{13}\text{C}$ | Form. cor. | Suess cor. (‰) | $\delta^{13}\text{C}_{\text{cor}}$ | $\delta^{15}\text{N}$ | Col. %C | Col. %N | Col. C:N | <i>A priori</i> ecotype | $\delta^{13}\text{C}$ ecotype ID | Notes |
|-----------------------------|---------|-------------|-----------------|----------|-----------|-------------|--------------|-----------------|-------------|----------------------------|---------|---------|----------|-----------------------------------------|----------------------------|------------|----------------|------------------------------------|-----------------------|---------|---------|----------|-------------------------|----------------------------------|-------|
| Kaeriyama et al. 2004       |         | NA          | Gulf of Alaska  | 50.560   | -145.000  |             | 2000-00-00   | Muscle          |             |                            |         |         |          | -19.3                                   | *-15.6                     | n          | 0.8            | -14.8                              | 11.4                  |         |         |          | 2                       |                                  |       |
| Kaeriyama et al. 2004       |         | NA          | Gulf of Alaska  | 50.560   | -145.000  |             | 2000-00-00   | Muscle          |             |                            |         |         |          | -19.3                                   | *-15.6                     | n          | 0.8            | -14.8                              | 11.9                  |         |         |          | 2                       |                                  |       |
| Kaeriyama et al. 2004       |         | NA          | Gulf of Alaska  | 50.560   | -145.000  |             | 2000-00-00   | Muscle          |             |                            |         |         |          | -19.3                                   | *-15.6                     | n          | 0.8            | -14.8                              | 10.3                  |         |         |          | 2                       |                                  |       |
| Kaeriyama et al. 2004       |         | NA          | Gulf of Alaska  | 50.560   | -145.000  |             | 2000-00-00   | Muscle          |             |                            |         |         |          | -19.3                                   | *-15.6                     | n          | 0.8            | -14.8                              | 11.2                  |         |         |          | 2                       |                                  |       |
| Kaeriyama et al. 2004       |         | NA          | Gulf of Alaska  | 50.560   | -145.000  |             | 2000-00-00   | Muscle          |             |                            |         |         |          | -19.2                                   | *-15.5                     | n          | 0.8            | -14.7                              | 11.0                  |         |         |          | 2                       |                                  |       |
| Kaeriyama et al. 2004       |         | NA          | Gulf of Alaska  | 50.560   | -145.000  |             | 2000-00-00   | Muscle          |             |                            |         |         |          | -19.2                                   | *-15.5                     | n          | 0.8            | -14.7                              | 11.8                  |         |         |          | 2                       |                                  |       |
| Kaeriyama et al. 2004       |         | NA          | Gulf of Alaska  | 50.560   | -145.000  |             | 2000-00-00   | Muscle          |             |                            |         |         |          | -18.8                                   | *-15.1                     | n          | 0.8            | -14.3                              | 10.7                  |         |         |          | 2                       |                                  |       |
| Kaeriyama et al. 2004       |         | NA          | Gulf of Alaska  | 50.560   | -145.000  |             | 2000-00-00   | Muscle          |             |                            |         |         |          | -18.8                                   | *-15.1                     | n          | 0.8            | -14.3                              | 10.7                  |         |         |          | 2                       |                                  |       |
| Kaeriyama et al. 2004       |         | NA          | Gulf of Alaska  | 50.560   | -145.000  |             | 2000-00-00   | Muscle          |             |                            |         |         |          | -18.7                                   | *-15.0                     | n          | 0.8            | -14.2                              | 12.4                  |         |         |          | 2                       |                                  |       |
| Kaeriyama et al. 2004       |         | NA          | Gulf of Alaska  | 50.560   | -145.000  |             | 2000-00-00   | Muscle          |             |                            |         |         |          | -18.7                                   | *-15.0                     | n          | 0.8            | -14.2                              | 10.7                  |         |         |          | 2                       |                                  |       |
| Kaeriyama et al. 2004       |         | NA          | Gulf of Alaska  | 50.560   | -145.000  |             | 2000-00-00   | Muscle          |             |                            |         |         |          | -18.5                                   | *-14.8                     | n          | 0.8            | -14.0                              | 11.8                  |         |         |          | 2                       |                                  |       |
| Kaeriyama et al. 2004       |         | NA          | Gulf of Alaska  | 50.560   | -145.000  |             | 2000-00-00   | Muscle          |             |                            |         |         |          | -18.1                                   | *-14.4                     | n          | 0.8            | -13.6                              | 11.9                  |         |         |          | 2                       |                                  |       |
| Qin and Kaeriyama 2016      |         | 122         | Gulf of Alaska  | 49.430   | -180.000  |             | 2006-00-00   | Muscle          |             |                            | 45.6    | 14.1    | 3.8      | -20.7                                   | *-17.0                     | n          | 0.9            | -16.1                              | 11.4                  |         |         |          | 2                       |                                  |       |
| Qin and Kaeriyama 2016      |         | 120         | Gulf of Alaska  | 49.040   | -173.550  |             | 2006-00-00   | Muscle          |             |                            | 46.0    | 14.5    | 3.7      | -19.9                                   | *-16.2                     | n          | 0.9            | -15.3                              | 11.3                  |         |         |          | 2                       |                                  |       |
| Welch and Parsons 1993      |         | NA          | High Seas       | 47.407   | 177.749   |             | 1991-00-00   | Muscle          |             |                            |         |         |          | -20.0                                   | *-16.3                     | n          | 0.6            | -15.7                              | 10.8                  |         |         |          | 2                       |                                  |       |
| Welch and Parsons 1993      |         | NA          | High Seas       | 47.407   | 177.749   |             | 1991-00-00   | Muscle          |             |                            |         |         |          | -19.7                                   | *-16.0                     | n          | 0.6            | -15.4                              | 10.9                  |         |         |          | 2                       |                                  |       |
| Welch and Parsons 1993      |         | NA          | High Seas       | 47.407   | 177.749   |             | 1991-00-00   | Muscle          |             |                            |         |         |          | -19.5                                   | *-15.8                     | n          | 0.6            | -15.2                              | 11.1                  |         |         |          | 2                       |                                  |       |
| Welch and Parsons 1993      |         | NA          | High Seas       | 47.407   | 177.749   |             | 1991-00-00   | Muscle          |             |                            |         |         |          | -19.5                                   | *-15.8                     | n          | 0.6            | -15.1                              | 10.8                  |         |         |          | 2                       |                                  |       |
| Welch and Parsons 1993      |         | NA          | High Seas       | 47.407   | 177.749   |             | 1991-00-00   | Muscle          |             |                            |         |         |          | -19.2                                   | *-15.5                     | n          | 0.6            | -14.9                              | 12.1                  |         |         |          | 2                       |                                  |       |
| Satterfield and Finney 2002 |         | HUGH-SM-31  | Huge Smith Lake | 55.060   | -130.420  | AK          | 1992-00-00   | Muscle          |             | -21.4                      | 49.1    | 12.2    | 4.0      | -21.4                                   | *-17.7                     | n          | 0.6            | -17.1                              | 11.6                  |         |         |          | 2                       |                                  |       |
| Satterfield and Finney 2002 |         | HUGH-SM-30  | Huge Smith Lake | 55.060   | -130.420  | AK          | 1992-00-00   | Muscle          |             | -21.4                      | 50.0    | 11.8    | 4.2      | -21.2                                   | *-17.5                     | n          | 0.6            | -16.8                              | 11.1                  |         |         |          | 2                       |                                  |       |
| Satterfield and Finney 2002 |         | HUGH-SM-47  | Huge Smith Lake | 55.060   | -130.420  | AK          | 1996-00-00   | Muscle          |             | -22.8                      | 51.3    | 8.6     | 6.0      | -21.3                                   | *-17.6                     | n          | 0.7            | -16.9                              | 11.9                  |         |         |          | 2                       |                                  |       |
| Satterfield and Finney 2002 |         | ILIAM-97-6  | Iliamna Lake    | 59.537   | -155.167  | AK          | 1997-00-00   | Muscle          |             | -19.8                      | 37.4    | 11.8    | 3.2      | -21.0                                   | *-17.3                     | n          | 0.7            | -16.6                              | 11.0                  |         |         |          | 2                       |                                  |       |
| Satterfield and Finney 2002 |         | ILIAM-97-2  | Iliamna Lake    | 59.537   | -155.167  | AK          | 1997-00-00   | Muscle          |             | -19.8                      | 56.8    | 17.0    | 3.3      | -20.8                                   | *-17.1                     | n          | 0.7            | -16.3                              | 11.9                  |         |         |          | 2                       |                                  |       |
| Satterfield and Finney 2002 |         | ILIAM-97-7  | Iliamna Lake    | 59.537   | -155.167  | AK          | 1997-00-00   | Muscle          |             | -19.8                      | 54.9    | 16.3    | 3.4      | -20.6                                   | *-16.9                     | n          | 0.7            | -16.2                              | 11.3                  |         |         |          | 2                       |                                  |       |
| Satterfield and Finney 2002 |         | ILIAM-97-4  | Iliamna Lake    | 59.537   | -155.167  | AK          | 1997-00-00   | Muscle          |             | -21.7                      | 59.4    | 16.2    | 3.7      | -22.2                                   | *-18.5                     | n          | 0.7            | -17.7                              | 10.2                  |         |         |          | 2                       |                                  |       |
| Satterfield and Finney 2002 |         | ILIAM-97-5  | Iliamna Lake    | 59.537   | -155.167  | AK          | 1997-00-00   | Muscle          |             | -20.1                      | 59.0    | 15.8    | 3.7      | -20.5                                   | *-16.8                     | n          | 0.7            | -16.0                              | 10.7                  |         |         |          | 2                       |                                  |       |
| Satterfield and Finney 2002 |         | ILIAM-97-9  | Iliamna Lake    | 59.537   | -155.167  | AK          | 1997-00-00   | Muscle          |             | -20.1                      | 56.7    | 14.0    | 4.0      | -20.0                                   | *-16.3                     | n          | 0.7            | -15.6                              | 11.4                  |         |         |          | 2                       |                                  |       |
| Satterfield and Finney 2002 |         | ILIAM-97-1  | Iliamna Lake    | 59.537   | -155.167  | AK          | 1997-00-00   | Muscle          |             | -20.9                      | 60.7    | 14.7    | 4.1      | -20.7                                   | *-17.1                     | n          | 0.7            | -16.3                              | 11.5                  |         |         |          | 2                       |                                  |       |
| Satterfield and Finney 2002 |         | ILIAM-97-8  | Iliamna Lake    | 59.537   | -155.167  | AK          | 1997-00-00   | Muscle          |             | -21.1                      | 58.2    | 13.2    | 4.4      | -20.6                                   | *-16.9                     | n          | 0.7            | -16.2                              | 11.4                  |         |         |          | 2                       |                                  |       |
| Satterfield and Finney 2002 |         | ILIAM-97-10 | Iliamna Lake    | 59.537   | -155.167  | AK          | 1997-00-00   | Muscle          |             | -21.0                      | 58.3    | 12.0    | 4.8      | -20.2                                   | *-16.5                     | n          | 0.7            | -15.7                              | 12.7                  |         |         |          | 2                       |                                  |       |
| Satterfield and Finney 2002 |         | ILIAM-97-3  | Iliamna Lake    | 59.537   | -155.167  | AK          | 1997-00-00   | Muscle          |             | -21.1                      | 66.3    | 13.6    | 4.9      | -20.3                                   | *-16.6                     | n          | 0.7            | -15.9                              | 11.7                  |         |         |          | 2                       |                                  |       |
| Welch and Parsons 1993      |         | NA          | Iliamna Lake    | 59.537   | -155.167  | AK          | 1991-00-00   | Muscle          |             |                            |         |         |          | -20.7                                   | *-17.0                     | n          | 0.6            | -16.4                              | 12.3                  |         |         |          | 2                       |                                  |       |
| Welch and Parsons 1993      |         | NA          | Iliamna Lake    | 59.537   | -155.167  | AK          | 1991-00-00   | Muscle          |             |                            |         |         |          | -20.6                                   | *-16.9                     | n          | 0.6            | -16.3                              | 11.8                  |         |         |          | 2                       |                                  |       |
| Welch and Parsons 1993      |         | NA          | Iliamna Lake    | 59.537   | -155.167  | AK          | 1991-00-00   | Muscle          |             |                            |         |         |          | -20.5                                   | *-16.8                     | n          | 0.6            | -16.2                              | 12.1                  |         |         |          | 2                       |                                  |       |
| Welch and Parsons 1993      |         | NA          | Iliamna Lake    | 59.537   | -155.167  | AK          | 1991-00-00   | Muscle          |             |                            |         |         |          | -20.5                                   | *-16.8                     | n          | 0.6            | -16.2                              | 11.9                  |         |         |          | 2                       |                                  |       |
| Welch and Parsons 1993      |         | NA          | Iliamna Lake    | 59.537   | -155.167  | AK          | 1991-00-00   | Muscle          |             |                            |         |         |          | -20.5                                   | *-16.8                     | n          | 0.6            | -16.2                              | 12.5                  |         |         |          | 2                       |                                  |       |
| Welch and Parsons 1993      |         | NA          | Iliamna Lake    | 59.537   | -155.167  | AK          | 1991-00-00   | Muscle          |             |                            |         |         |          | -20.5                                   | *-16.8                     | n          | 0.6            | -16.2                              | 11.4                  |         |         |          | 2                       |                                  |       |
| Welch and Parsons 1993      |         | NA          | Iliamna Lake    | 59.537   | -155.167  | AK          | 1991-00-00   | Muscle          |             |                            |         |         |          | -20.3                                   | *-16.7                     | n          | 0.6            | -16.0                              | 12.7                  |         |         |          | 2                       |                                  |       |
| Welch and Parsons 1993      |         | NA          | Iliamna Lake    | 59.537   | -155.167  | AK          | 1991-00-00   | Muscle          |             |                            |         |         |          | -20.3                                   | *-16.6                     | n          | 0.6            | -16.0                              | 11.5                  |         |         |          | 2                       |                                  |       |
| Welch and Parsons 1993      |         | NA          | Iliamna Lake    | 59.537   | -155.167  | AK          | 1991-00-00   | Muscle          |             |                            |         |         |          | -20.2                                   | *-16.5                     | n          | 0.6            | -15.9                              | 12.1                  |         |         |          | 2                       |                                  |       |
| Welch and Parsons 1993      |         | NA          | Iliamna Lake    | 59.537   | -155.167  | AK          | 1991-00-00   | Muscle          |             |                            |         |         |          | -20.0                                   | *-16.3                     | n          | 0.6            | -15.7                              | 12.1                  |         |         |          | 2                       |                                  |       |
| Welch and Parsons 1993      |         | NA          | Iliamna Lake    | 59.537   | -155.167  | AK          | 1991-00-00   | Muscle          |             |                            |         |         |          | -19.9                                   | *-16.2                     | n          | 0.6            | -15.5                              | 11.8                  |         |         |          | 2                       |                                  |       |
| Welch and Parsons 1993      |         | NA          | Iliamna Lake    | 59.537   | -155.167  | AK          | 1991-00-00   | Muscle          |             |                            |         |         |          | -19.6                                   | *-15.9                     | n          | 0.6            | -15.3                              | 13.6                  |         |         |          | 2                       |                                  |       |
| Satterfield and Finney 2002 |         | KAR-98-4    | Karluk Lake     | 57.250   | -154.050  | AK          | 1998-00-00   | Muscle          |             | -20.1                      | 49.4    | 14.8    | 3.3      | -21.0                                   | *-17.3                     | n          | 0.8            | -16.5                              | 11.0                  |         |         |          | 2                       |                                  |       |
| Satterfield and Finney 2002 |         | KAR-98-1    | Karluk Lake     | 57.250   | -154.050  | AK          | 1998-00-00   | Muscle          |             | -20.5                      | 49.2    | 14.6    | 3.4      | -21.3                                   | *-17.7                     | n          | 0.8            | -16.9                              | 10.8                  |         |         |          | 2                       |                                  |       |
| Satterfield and Finney 2002 |         | KAR-98-3    | Karluk Lake     | 57.250   | -154.050  | AK          | 1998-00-00   | Muscle          |             | -20.8                      | 49.5    | 14.6    | 3.4      | -21.6                                   | *-17.9                     | n          | 0.8            | -17.2                              | 10.3                  |         |         |          | 2                       |                                  |       |
| Satterfield and Finney 2002 |         | KAR-98-5    | Karluk Lake     | 57.250   | -154.050  | AK          | 1998-00-00   | Muscle          |             | -20.0                      | 50.0    | 14.7    | 3.4      | -20.8                                   | *-17.1                     | n          | 0.8            | -16.3                              | 11.4                  |         |         |          | 2                       |                                  |       |
| Satterfield and Finney 2002 |         | KAR-98-2    | Karluk Lake     | 57.250   | -154.050  | AK          | 1998-00-00   | Muscle          |             | -20.8                      | 50.6    | 14.3    | 3.5      | -21.3                                   | *-17.7                     | n          | 0.8            | -16.9                              | 11.1                  |         |         |          | 2                       |                                  |       |
| Guiry et al. 2016           |         | SUBC 9321   | Pacific Ocean   | 49.123   | -123.184  | BC          | 2015-00-00   | Bone , vertebra | 18.9        |                            |         |         |          |                                         | -18.4                      | n          | 1.2            | -17.2                              | 10.7                  | 39.4    | 14.2    | 3.23     | 2                       |                                  |       |

| Source/Donor                | Lab No. | Cat No     | Site Name             | Latitude | Longitude | Prov. State | Capture Date | Material        | Col. Yld. % | Mus. $\delta^{13}\text{C}$ | Mus. %C | Mus. %N | Mus. C:N | Mus. $\delta^{13}\text{C}$ , lipid cor. | Col. $\delta^{13}\text{C}$ | Form. cor. | Suess cor. (‰) | $\delta^{13}\text{C}_{\text{cor}}$ | $\delta^{15}\text{N}$ | Col. %C | Col. %N | Col. C:N | <i>A priori</i> ecotype | $\delta^{13}\text{C}$ ecotype ID | Notes            |  |
|-----------------------------|---------|------------|-----------------------|----------|-----------|-------------|--------------|-----------------|-------------|----------------------------|---------|---------|----------|-----------------------------------------|----------------------------|------------|----------------|------------------------------------|-----------------------|---------|---------|----------|-------------------------|----------------------------------|------------------|--|
| Horii et al. 2015           |         | ON         | Pacific Ocean         | 54.594   | -170.000  |             | 2014-00-00   | Muscle          |             |                            |         |         |          | -20.4                                   | *-16.7                     | n          | 1.1            | -15.6                              | 12.5                  |         |         |          |                         | 2                                |                  |  |
| Guiry et al. 2016           |         | SUBC 10161 | Prince Rupert Harbour | 54.320   | -130.321  | BC          | 2015-06-00   | Bone , vertebra | 16.1        |                            |         |         |          |                                         | -17.5                      | n          | 1.2            | -16.3                              | 10.5                  | 40.4    | 15.1    | 3.13     |                         | 2                                |                  |  |
| Guiry et al. 2016           |         | SUBC 10153 | Prince Rupert Harbour | 54.320   | -130.321  | BC          | 2015-06-00   | Bone , vertebra | 16.4        |                            |         |         |          |                                         | -17.7                      | n          | 1.2            | -16.5                              | 10.7                  | 40.1    | 14.8    | 3.16     |                         | 2                                |                  |  |
| Satterfield and Finney 2002 |         | R-662      | Red Lake              | 57.150   | -154.200  | AK          | 1966-00-00   | Scale           |             |                            |         |         |          |                                         | -17.9                      | n          | 0.3            | -17.6                              | 9.1                   | 27.7    | 11.3    | 2.86     |                         | 2                                | C:N unacceptable |  |
| Satterfield and Finney 2002 |         | R-902      | Red Lake              | 57.150   | -154.200  | AK          | 1990-00-00   | Scale           |             |                            |         |         |          |                                         | -17.0                      | n          | 0.6            | -16.4                              | 11.7                  | 23.8    | 9.7     | 2.86     |                         | 2                                | C:N unacceptable |  |
| Satterfield and Finney 2002 |         | R-951      | Red Lake              | 57.150   | -154.200  | AK          | 1995-00-00   | Scale           |             |                            |         |         |          |                                         | -17.0                      | n          | 0.7            | -16.3                              | 11.5                  | 24.6    | 10.0    | 2.87     |                         | 2                                | C:N unacceptable |  |
| Satterfield and Finney 2002 |         | R-904      | Red Lake              | 57.150   | -154.200  | AK          | 1990-00-00   | Scale           |             |                            |         |         |          |                                         | -17.4                      | n          | 0.6            | -16.8                              | 12.4                  | 26.2    | 10.6    | 2.88     |                         | 2                                | C:N unacceptable |  |
| Satterfield and Finney 2002 |         | R-825      | Red Lake              | 57.150   | -154.200  | AK          | 1982-00-00   | Scale           |             |                            |         |         |          |                                         | -17.8                      | n          | 0.5            | -17.3                              | 8.6                   | 23.6    | 9.5     | 2.90     |                         | 2                                | C:N unacceptable |  |
| Satterfield and Finney 2002 |         | R-861      | Red Lake              | 57.150   | -154.200  | AK          | 1986-00-00   | Scale           |             |                            |         |         |          |                                         | -16.7                      | n          | 0.6            | -16.1                              | 8.4                   | 24.9    | 12.8    | 2.27     |                         | 2                                | C:N unacceptable |  |
| Satterfield and Finney 2002 |         | R-831      | Red Lake              | 57.150   | -154.200  | AK          | 1983-00-00   | Scale           |             |                            |         |         |          |                                         | -16.5                      | n          | 0.5            | -16.0                              | 9.7                   | 24.3    | 11.3    | 2.51     |                         | 2                                | C:N unacceptable |  |
| Satterfield and Finney 2002 |         | R-842      | Red Lake              | 57.150   | -154.200  | AK          | 1984-00-00   | Scale           |             |                            |         |         |          |                                         | -17.4                      | n          | 0.5            | -16.8                              | 7.2                   | 25.9    | 11.4    | 2.65     |                         | 2                                | C:N unacceptable |  |
| Satterfield and Finney 2002 |         | R-762      | Red Lake              | 57.150   | -154.200  | AK          | 1976-00-00   | Scale           |             |                            |         |         |          |                                         | -17.4                      | n          | 0.4            | -17.0                              | 8.3                   | 26.6    | 11.6    | 2.67     |                         | 2                                | C:N unacceptable |  |
| Satterfield and Finney 2002 |         | R-705      | Red Lake              | 57.150   | -154.200  | AK          | 1970-00-00   | Scale           |             |                            |         |         |          |                                         | -18.0                      | n          | 0.4            | -17.7                              | 11.0                  | 25.6    | 11.1    | 2.69     |                         | 2                                | C:N unacceptable |  |
| Satterfield and Finney 2002 |         | R-792      | Red Lake              | 57.150   | -154.200  | AK          | 1979-00-00   | Scale           |             |                            |         |         |          |                                         | -17.4                      | n          | 0.5            | -16.9                              | 9.6                   | 24.7    | 10.7    | 2.69     |                         | 2                                | C:N unacceptable |  |
| Satterfield and Finney 2002 |         | R-823      | Red Lake              | 57.150   | -154.200  | AK          | 1982-00-00   | Scale           |             |                            |         |         |          |                                         | -16.5                      | n          | 0.5            | -16.0                              | 8.5                   | 26.1    | 11.3    | 2.69     |                         | 2                                | C:N unacceptable |  |
| Satterfield and Finney 2002 |         | R-704      | Red Lake              | 57.150   | -154.200  | AK          | 1970-00-00   | Scale           |             |                            |         |         |          |                                         | -18.6                      | n          | 0.4            | -18.2                              | 8.8                   | 25.9    | 11.1    | 2.72     |                         | 2                                | C:N unacceptable |  |
| Satterfield and Finney 2002 |         | R-981      | Red Lake              | 57.150   | -154.200  | AK          | 1998-00-00   | Scale           |             |                            |         |         |          |                                         | -16.9                      | n          | 0.8            | -16.1                              | 9.6                   | 24.9    | 10.6    | 2.74     |                         | 2                                | C:N unacceptable |  |
| Satterfield and Finney 2002 |         | R-852      | Red Lake              | 57.150   | -154.200  | AK          | 1985-00-00   | Scale           |             |                            |         |         |          |                                         | -16.8                      | n          | 0.5            | -16.3                              | 9.4                   | 22.2    | 9.4     | 2.75     |                         | 2                                | C:N unacceptable |  |
| Satterfield and Finney 2002 |         | R-864      | Red Lake              | 57.150   | -154.200  | AK          | 1986-00-00   | Scale           |             |                            |         |         |          |                                         | -17.1                      | n          | 0.6            | -16.5                              | 12.5                  | 25.1    | 10.6    | 2.76     |                         | 2                                | C:N unacceptable |  |
| Satterfield and Finney 2002 |         | R-941      | Red Lake              | 57.150   | -154.200  | AK          | 1994-00-00   | Scale           |             |                            |         |         |          |                                         | -18.8                      | n          | 0.7            | -18.1                              | 9.5                   | 24.2    | 10.2    | 2.77     |                         | 2                                | C:N unacceptable |  |
| Satterfield and Finney 2002 |         | R-802      | Red Lake              | 57.150   | -154.200  | AK          | 1980-00-00   | Scale           |             |                            |         |         |          |                                         | -16.1                      | n          | 0.5            | -15.7                              | 10.2                  | 25.0    | 10.5    | 2.78     |                         | 2                                | C:N unacceptable |  |
| Satterfield and Finney 2002 |         | R-971      | Red Lake              | 57.150   | -154.200  | AK          | 1997-00-00   | Scale           |             |                            |         |         |          |                                         | -17.0                      | n          | 0.7            | -16.2                              | 10.3                  | 29.4    | 12.3    | 2.79     |                         | 2                                | C:N unacceptable |  |
| Satterfield and Finney 2002 |         | R-692      | Red Lake              | 57.150   | -154.200  | AK          | 1969-00-00   | Scale           |             |                            |         |         |          |                                         | -17.4                      | n          | 0.3            | -17.1                              | 10.4                  | 25.6    | 10.7    | 2.79     |                         | 2                                | C:N unacceptable |  |
| Satterfield and Finney 2002 |         | R-812      | Red Lake              | 57.150   | -154.200  | AK          | 1981-00-00   | Scale           |             |                            |         |         |          |                                         | -16.1                      | n          | 0.5            | -15.6                              | 8.2                   | 25.0    | 10.4    | 2.80     |                         | 2                                | C:N unacceptable |  |
| Satterfield and Finney 2002 |         | R-821      | Red Lake              | 57.150   | -154.200  | AK          | 1982-00-00   | Scale           |             |                            |         |         |          |                                         | -17.4                      | n          | 0.5            | -16.9                              | 7.5                   | 25.4    | 10.5    | 2.82     |                         | 2                                | C:N unacceptable |  |
| Satterfield and Finney 2002 |         | R-862      | Red Lake              | 57.150   | -154.200  | AK          | 1986-00-00   | Scale           |             |                            |         |         |          |                                         | -17.5                      | n          | 0.6            | -16.9                              | 10.2                  | 25.4    | 10.5    | 2.82     |                         | 2                                | C:N unacceptable |  |
| Satterfield and Finney 2002 |         | R-865      | Red Lake              | 57.150   | -154.200  | AK          | 1986-00-00   | Scale           |             |                            |         |         |          |                                         | -16.7                      | n          | 0.6            | -16.1                              | 10.5                  | 25.7    | 10.6    | 2.83     |                         | 2                                | C:N unacceptable |  |
| Satterfield and Finney 2002 |         | R-824      | Red Lake              | 57.150   | -154.200  | AK          | 1982-00-00   | Scale           |             |                            |         |         |          |                                         | -17.8                      | n          | 0.5            | -17.3                              | 8.5                   | 25.4    | 10.2    | 2.90     |                         | 2                                |                  |  |
| Satterfield and Finney 2002 |         | R-901      | Red Lake              | 57.150   | -154.200  | AK          | 1990-00-00   | Scale           |             |                            |         |         |          |                                         | -17.2                      | n          | 0.6            | -16.6                              | 11.6                  | 23.7    | 9.5     | 2.91     |                         | 2                                |                  |  |
| Satterfield and Finney 2002 |         | R-982      | Red Lake              | 57.150   | -154.200  | AK          | 1998-00-00   | Scale           |             |                            |         |         |          |                                         | -17.7                      | n          | 0.8            | -17.0                              | 10.6                  | 25.2    | 10.1    | 2.91     |                         | 2                                |                  |  |
| Satterfield and Finney 2002 |         | R-661      | Red Lake              | 57.150   | -154.200  | AK          | 1966-00-00   | Scale           |             |                            |         |         |          |                                         | -18.1                      | n          | 0.3            | -17.8                              | 9.1                   | 28.0    | 11.2    | 2.92     |                         | 2                                |                  |  |
| Satterfield and Finney 2002 |         | R-945      | Red Lake              | 57.150   | -154.200  | AK          | 1994-00-00   | Scale           |             |                            |         |         |          |                                         | -16.7                      | n          | 0.7            | -16.0                              | 11.3                  | 25.5    | 10.2    | 2.92     |                         | 2                                |                  |  |
| Satterfield and Finney 2002 |         | R-712      | Red Lake              | 57.150   | -154.200  | AK          | 1971-00-00   | Scale           |             |                            |         |         |          |                                         | -18.3                      | n          | 0.4            | -17.9                              | 10.2                  | 23.1    | 9.2     | 2.93     |                         | 2                                |                  |  |
| Satterfield and Finney 2002 |         | R-972      | Red Lake              | 57.150   | -154.200  | AK          | 1997-00-00   | Scale           |             |                            |         |         |          |                                         | -17.4                      | n          | 0.7            | -16.6                              | 9.6                   | 25.9    | 10.3    | 2.93     |                         | 2                                |                  |  |
| Satterfield and Finney 2002 |         | R-782      | Red Lake              | 57.150   | -154.200  | AK          | 1978-00-00   | Scale           |             |                            |         |         |          |                                         | -17.5                      | n          | 0.4            | -17.0                              | 9.2                   | 21.9    | 8.7     | 2.94     |                         | 2                                |                  |  |
| Satterfield and Finney 2002 |         | R-663      | Red Lake              | 57.150   | -154.200  | AK          | 1966-00-00   | Scale           |             |                            |         |         |          |                                         | -17.5                      | n          | 0.3            | -17.2                              | 8.2                   | 27.7    | 11.0    | 2.94     |                         | 2                                |                  |  |
| Satterfield and Finney 2002 |         | R-703      | Red Lake              | 57.150   | -154.200  | AK          | 1970-00-00   | Scale           |             |                            |         |         |          |                                         | -18.1                      | n          | 0.4            | -17.7                              | 8.7                   | 27.0    | 10.7    | 2.94     |                         | 2                                |                  |  |
| Satterfield and Finney 2002 |         | R-872      | Red Lake              | 57.150   | -154.200  | AK          | 1987-00-00   | Scale           |             |                            |         |         |          |                                         | -18.2                      | n          | 0.6            | -17.6                              | 9.1                   | 23.6    | 9.3     | 2.96     |                         | 2                                |                  |  |
| Satterfield and Finney 2002 |         | R-743      | Red Lake              | 57.150   | -154.200  | AK          | 1974-00-00   | Scale           |             |                            |         |         |          |                                         | -17.2                      | n          | 0.4            | -16.8                              | 9.2                   | 25.4    | 10.0    | 2.96     |                         | 2                                |                  |  |
| Satterfield and Finney 2002 |         | R-781      | Red Lake              | 57.150   | -154.200  | AK          | 1978-00-00   | Scale           |             |                            |         |         |          |                                         | -17.1                      | n          | 0.4            | -16.6                              | 10.2                  | 30.8    | 12.1    | 2.97     |                         | 2                                |                  |  |
| Satterfield and Finney 2002 |         | R-851      | Red Lake              | 57.150   | -154.200  | AK          | 1985-00-00   | Scale           |             |                            |         |         |          |                                         | -17.2                      | n          | 0.5            | -16.6                              | 9.6                   | 24.0    | 9.4     | 2.98     |                         | 2                                |                  |  |
| Satterfield and Finney 2002 |         | R-732      | Red Lake              | 57.150   | -154.200  | AK          | 1973-00-00   | Scale           |             |                            |         |         |          |                                         | -17.1                      | n          | 0.4            | -16.7                              | 10.1                  | 24.8    | 9.7     | 2.98     |                         | 2                                |                  |  |
| Satterfield and Finney 2002 |         | R-672      | Red Lake              | 57.150   | -154.200  | AK          | 1967-00-00   | Scale           |             |                            |         |         |          |                                         | -17.5                      | n          | 0.3            | -17.1                              | 10.5                  | 25.6    | 10.0    | 2.99     |                         | 2                                |                  |  |
| Satterfield and Finney 2002 |         | R-721      | Red Lake              | 57.150   | -154.200  | AK          | 1972-00-00   | Scale           |             |                            |         |         |          |                                         | -17.5                      | n          | 0.4            | -17.1                              | 11.0                  | 23.5    | 9.1     | 3.01     |                         | 2                                |                  |  |
| Satterfield and Finney 2002 |         | R-931      | Red Lake              | 57.150   | -154.200  | AK          | 1993-00-00   | Scale           |             |                            |         |         |          |                                         | -18.2                      | n          | 0.7            | -17.5                              | 10.4                  | 23.5    | 9.1     | 3.01     |                         | 2                                |                  |  |
| Satterfield and Finney 2002 |         | R-691      | Red Lake              | 57.150   | -154.200  | AK          | 1969-00-00   | Scale           |             |                            |         |         |          |                                         | -17.4                      | n          | 0.3            | -17.0                              | 11.4                  | 23.6    | 9.1     | 3.02     |                         | 2                                |                  |  |
| Satterfield and Finney 2002 |         | R-912      | Red Lake              | 57.150   | -154.200  | AK          | 1991-00-00   | Scale           |             |                            |         |         |          |                                         | -17.3                      | n          | 0.6            | -16.6                              | 11.4                  | 23.1    | 8.9     | 3.03     |                         | 2                                |                  |  |
| Satterfield and Finney 2002 |         | R-722      | Red Lake              | 57.150   | -154.200  | AK          | 1972-00-00   | Scale           |             |                            |         |         |          |                                         | -18.2                      | n          | 0.4            | -17.8                              | 10.4                  | 23.9    | 9.2     | 3.03     |                         | 2                                |                  |  |
| Satterfield and Finney 2002 |         | R-841      | Red Lake              | 57.150   | -154.200  | AK          | 1984-00-00   | Scale           |             |                            |         |         |          |                                         | -17.0                      | n          | 0.5            | -16.4                              | 10.5                  | 25.0    | 9.6     | 3.04     |                         | 2                                |                  |  |
| Satterfield and Finney 2002 |         | R-822      | Red Lake              | 57.150   | -154.200  | AK          | 1982-00-00   | Scale           |             |                            |         |         |          |                                         | -18.9                      | n          | 0.5            | -18.4                              | 8.4                   | 27.1    | 10.4    | 3.04     |                         | 2                                |                  |  |

| Source/Donor                | Lab No. | Cat No | Site Name | Latitude | Longitude | Prov. State | Capture Date | Material | Col. Yld. % | Mus. $\delta^{13}\text{C}$ | Mus. %C | Mus. %N | Mus. C:N | Mus. $\delta^{13}\text{C}$ , lipid cor. | Col. $\delta^{13}\text{C}$ | Form. cor. | Suess cor. (‰) | $\delta^{13}\text{C}_{\text{cor}}$ | $\delta^{15}\text{N}$ | Col. %C | Col. %N | Col. C:N | <i>A priori</i> ecotype | $\delta^{13}\text{C}$ ecotype ID | Notes |
|-----------------------------|---------|--------|-----------|----------|-----------|-------------|--------------|----------|-------------|----------------------------|---------|---------|----------|-----------------------------------------|----------------------------|------------|----------------|------------------------------------|-----------------------|---------|---------|----------|-------------------------|----------------------------------|-------|
| Satterfield and Finney 2002 |         | R-921  | Red Lake  | 57.150   | -154.200  | AK          | 1992-00-00   | Scale    |             |                            |         |         |          |                                         | -17.1                      | n          | 0.6            | -16.4                              | 11.8                  | 24.5    | 9.4     | 3.04     | 2                       |                                  |       |
| Satterfield and Finney 2002 |         | R-801  | Red Lake  | 57.150   | -154.200  | AK          | 1980-00-00   | Scale    |             |                            |         |         |          |                                         | -17.7                      | n          | 0.5            | -17.2                              | 8.9                   | 24.0    | 9.2     | 3.04     | 2                       |                                  |       |
| Satterfield and Finney 2002 |         | R-671  | Red Lake  | 57.150   | -154.200  | AK          | 1967-00-00   | Scale    |             |                            |         |         |          |                                         | -17.5                      | n          | 0.3            | -17.1                              | 10.9                  | 22.7    | 8.7     | 3.04     | 2                       |                                  |       |
| Satterfield and Finney 2002 |         | R-733  | Red Lake  | 57.150   | -154.200  | AK          | 1973-00-00   | Scale    |             |                            |         |         |          |                                         | -17.1                      | n          | 0.4            | -16.7                              | 10.1                  | 26.4    | 10.1    | 3.05     | 2                       |                                  |       |
| Satterfield and Finney 2002 |         | R-745  | Red Lake  | 57.150   | -154.200  | AK          | 1974-00-00   | Scale    |             |                            |         |         |          |                                         | -17.4                      | n          | 0.4            | -17.0                              | 9.9                   | 25.9    | 9.9     | 3.05     | 2                       |                                  |       |
| Satterfield and Finney 2002 |         | R-752  | Red Lake  | 57.150   | -154.200  | AK          | 1975-00-00   | Scale    |             |                            |         |         |          |                                         | -17.2                      | n          | 0.4            | -16.7                              | 10.3                  | 25.4    | 9.7     | 3.05     | 2                       |                                  |       |
| Satterfield and Finney 2002 |         | R-944  | Red Lake  | 57.150   | -154.200  | AK          | 1994-00-00   | Scale    |             |                            |         |         |          |                                         | -18.6                      | n          | 0.7            | -17.9                              | 9.8                   | 24.4    | 9.3     | 3.06     | 2                       |                                  |       |
| Satterfield and Finney 2002 |         | R-932  | Red Lake  | 57.150   | -154.200  | AK          | 1993-00-00   | Scale    |             |                            |         |         |          |                                         | -18.7                      | n          | 0.7            | -18.1                              | 9.5                   | 25.2    | 9.6     | 3.06     | 2                       |                                  |       |
| Satterfield and Finney 2002 |         | R-761  | Red Lake  | 57.150   | -154.200  | AK          | 1976-00-00   | Scale    |             |                            |         |         |          |                                         | -17.3                      | n          | 0.4            | -16.9                              | 11.4                  | 24.2    | 9.2     | 3.07     | 2                       |                                  |       |
| Satterfield and Finney 2002 |         | R-811  | Red Lake  | 57.150   | -154.200  | AK          | 1981-00-00   | Scale    |             |                            |         |         |          |                                         | -16.9                      | n          | 0.5            | -16.4                              | 10.5                  | 23.7    | 9.0     | 3.07     | 2                       |                                  |       |
| Satterfield and Finney 2002 |         | R-903  | Red Lake  | 57.150   | -154.200  | AK          | 1990-00-00   | Scale    |             |                            |         |         |          |                                         | -18.0                      | n          | 0.6            | -17.4                              | 8.9                   | 26.4    | 10.0    | 3.08     | 2                       |                                  |       |
| Satterfield and Finney 2002 |         | R-871  | Red Lake  | 57.150   | -154.200  | AK          | 1987-00-00   | Scale    |             |                            |         |         |          |                                         | -18.2                      | n          | 0.6            | -17.7                              | 9.3                   | 24.3    | 9.2     | 3.08     | 2                       |                                  |       |
| Satterfield and Finney 2002 |         | R-804  | Red Lake  | 57.150   | -154.200  | AK          | 1980-00-00   | Scale    |             |                            |         |         |          |                                         | -17.5                      | n          | 0.5            | -17.0                              | 9.7                   | 25.9    | 9.8     | 3.08     | 2                       |                                  |       |
| Satterfield and Finney 2002 |         | R-731  | Red Lake  | 57.150   | -154.200  | AK          | 1973-00-00   | Scale    |             |                            |         |         |          |                                         | -18.0                      | n          | 0.4            | -17.6                              | 10.1                  | 26.7    | 10.1    | 3.08     | 2                       |                                  |       |
| Satterfield and Finney 2002 |         | R-791  | Red Lake  | 57.150   | -154.200  | AK          | 1979-00-00   | Scale    |             |                            |         |         |          |                                         | -17.6                      | n          | 0.5            | -17.1                              | 10.1                  | 22.3    | 8.4     | 3.10     | 2                       |                                  |       |
| Satterfield and Finney 2002 |         | R-702  | Red Lake  | 57.150   | -154.200  | AK          | 1970-00-00   | Scale    |             |                            |         |         |          |                                         | -17.8                      | n          | 0.4            | -17.4                              | 10.5                  | 23.9    | 9.0     | 3.10     | 2                       |                                  |       |
| Satterfield and Finney 2002 |         | R-954  | Red Lake  | 57.150   | -154.200  | AK          | 1995-00-00   | Scale    |             |                            |         |         |          |                                         | -18.4                      | n          | 0.7            | -17.7                              | 9.9                   | 23.9    | 9.0     | 3.10     | 2                       |                                  |       |
| Satterfield and Finney 2002 |         | R-863  | Red Lake  | 57.150   | -154.200  | AK          | 1986-00-00   | Scale    |             |                            |         |         |          |                                         | -18.3                      | n          | 0.6            | -17.7                              | 10.1                  | 24.5    | 9.2     | 3.11     | 2                       |                                  |       |
| Satterfield and Finney 2002 |         | R-674  | Red Lake  | 57.150   | -154.200  | AK          | 1967-00-00   | Scale    |             |                            |         |         |          |                                         | -17.2                      | n          | 0.3            | -16.8                              | 10.8                  | 29.3    | 11.0    | 3.11     | 2                       |                                  |       |
| Satterfield and Finney 2002 |         | R-734  | Red Lake  | 57.150   | -154.200  | AK          | 1973-00-00   | Scale    |             |                            |         |         |          |                                         | -17.5                      | n          | 0.4            | -17.1                              | 11.0                  | 26.4    | 9.9     | 3.11     | 2                       |                                  |       |
| Satterfield and Finney 2002 |         | R-905  | Red Lake  | 57.150   | -154.200  | AK          | 1990-00-00   | Scale    |             |                            |         |         |          |                                         | -19.0                      | n          | 0.6            | -18.4                              | 9.3                   | 28.0    | 10.5    | 3.11     | 2                       |                                  |       |
| Satterfield and Finney 2002 |         | R-833  | Red Lake  | 57.150   | -154.200  | AK          | 1983-00-00   | Scale    |             |                            |         |         |          |                                         | -17.9                      | n          | 0.5            | -17.3                              | 9.6                   | 25.1    | 9.4     | 3.11     | 2                       |                                  |       |
| Satterfield and Finney 2002 |         | R-805  | Red Lake  | 57.150   | -154.200  | AK          | 1980-00-00   | Scale    |             |                            |         |         |          |                                         | -17.2                      | n          | 0.5            | -16.7                              | 9.5                   | 24.6    | 9.2     | 3.12     | 2                       |                                  |       |
| Satterfield and Finney 2002 |         | R-673  | Red Lake  | 57.150   | -154.200  | AK          | 1967-00-00   | Scale    |             |                            |         |         |          |                                         | -17.5                      | n          | 0.3            | -17.2                              | 9.5                   | 29.0    | 10.8    | 3.13     | 2                       |                                  |       |
| Satterfield and Finney 2002 |         | R-911  | Red Lake  | 57.150   | -154.200  | AK          | 1991-00-00   | Scale    |             |                            |         |         |          |                                         | -17.0                      | n          | 0.6            | -16.4                              | 10.5                  | 22.6    | 8.4     | 3.14     | 2                       |                                  |       |
| Satterfield and Finney 2002 |         | R-955  | Red Lake  | 57.150   | -154.200  | AK          | 1995-00-00   | Scale    |             |                            |         |         |          |                                         | -18.6                      | n          | 0.7            | -17.9                              | 10.1                  | 26.4    | 9.8     | 3.14     | 2                       |                                  |       |
| Satterfield and Finney 2002 |         | R-952  | Red Lake  | 57.150   | -154.200  | AK          | 1995-00-00   | Scale    |             |                            |         |         |          |                                         | -18.4                      | n          | 0.7            | -17.7                              | 10.0                  | 24.3    | 9.0     | 3.15     | 2                       |                                  |       |
| Satterfield and Finney 2002 |         | R-953  | Red Lake  | 57.150   | -154.200  | AK          | 1995-00-00   | Scale    |             |                            |         |         |          |                                         | -18.0                      | n          | 0.7            | -17.3                              | 11.0                  | 28.1    | 10.4    | 3.15     | 2                       |                                  |       |
| Satterfield and Finney 2002 |         | R-922  | Red Lake  | 57.150   | -154.200  | AK          | 1992-00-00   | Scale    |             |                            |         |         |          |                                         | -17.1                      | n          | 0.6            | -16.4                              | 11.5                  | 23.8    | 8.8     | 3.15     | 2                       |                                  |       |
| Satterfield and Finney 2002 |         | R-751  | Red Lake  | 57.150   | -154.200  | AK          | 1975-00-00   | Scale    |             |                            |         |         |          |                                         | -17.3                      | n          | 0.4            | -16.9                              | 8.4                   | 24.1    | 8.9     | 3.16     | 2                       |                                  |       |
| Satterfield and Finney 2002 |         | R-803  | Red Lake  | 57.150   | -154.200  | AK          | 1980-00-00   | Scale    |             |                            |         |         |          |                                         | -16.5                      | n          | 0.5            | -16.0                              | 10.0                  | 26.3    | 9.7     | 3.16     | 2                       |                                  |       |
| Satterfield and Finney 2002 |         | R-943  | Red Lake  | 57.150   | -154.200  | AK          | 1994-00-00   | Scale    |             |                            |         |         |          |                                         | -18.8                      | n          | 0.7            | -18.1                              | 10.3                  | 23.6    | 8.7     | 3.16     | 2                       |                                  |       |
| Satterfield and Finney 2002 |         | R-741  | Red Lake  | 57.150   | -154.200  | AK          | 1974-00-00   | Scale    |             |                            |         |         |          |                                         | -17.4                      | n          | 0.4            | -17.0                              | 11.0                  | 26.6    | 9.8     | 3.17     | 2                       |                                  |       |
| Satterfield and Finney 2002 |         | R-882  | Red Lake  | 57.150   | -154.200  | AK          | 1988-00-00   | Scale    |             |                            |         |         |          |                                         | -17.6                      | n          | 0.6            | -17.0                              | 10.6                  | 24.7    | 9.1     | 3.17     | 2                       |                                  |       |
| Satterfield and Finney 2002 |         | R-942  | Red Lake  | 57.150   | -154.200  | AK          | 1994-00-00   | Scale    |             |                            |         |         |          |                                         | -16.7                      | n          | 0.7            | -16.0                              | 11.1                  | 23.1    | 8.5     | 3.17     | 2                       |                                  |       |
| Satterfield and Finney 2002 |         | R-965  | Red Lake  | 57.150   | -154.200  | AK          | 1996-00-00   | Scale    |             |                            |         |         |          |                                         | -17.4                      | n          | 0.7            | -16.7                              | 10.5                  | 24.2    | 8.9     | 3.17     | 2                       |                                  |       |
| Satterfield and Finney 2002 |         | R-784  | Red Lake  | 57.150   | -154.200  | AK          | 1978-00-00   | Scale    |             |                            |         |         |          |                                         | -18.1                      | n          | 0.4            | -17.7                              | 7.1                   | 24.8    | 9.1     | 3.18     | 2                       |                                  |       |
| Satterfield and Finney 2002 |         | R-961  | Red Lake  | 57.150   | -154.200  | AK          | 1996-00-00   | Scale    |             |                            |         |         |          |                                         | -17.5                      | n          | 0.7            | -16.8                              | 10.3                  | 24.8    | 9.1     | 3.18     | 2                       |                                  |       |
| Satterfield and Finney 2002 |         | R-832  | Red Lake  | 57.150   | -154.200  | AK          | 1983-00-00   | Scale    |             |                            |         |         |          |                                         | -17.3                      | n          | 0.5            | -16.8                              | 11.2                  | 27.3    | 10.0    | 3.18     | 2                       |                                  |       |
| Satterfield and Finney 2002 |         | R-783  | Red Lake  | 57.150   | -154.200  | AK          | 1978-00-00   | Scale    |             |                            |         |         |          |                                         | -18.6                      | n          | 0.4            | -18.2                              | 7.6                   | 23.5    | 8.6     | 3.19     | 2                       |                                  |       |
| Satterfield and Finney 2002 |         | R-962  | Red Lake  | 57.150   | -154.200  | AK          | 1996-00-00   | Scale    |             |                            |         |         |          |                                         | -16.1                      | n          | 0.7            | -15.3                              | 11.0                  | 23.5    | 8.6     | 3.19     | 2                       |                                  |       |
| Satterfield and Finney 2002 |         | R-963  | Red Lake  | 57.150   | -154.200  | AK          | 1996-00-00   | Scale    |             |                            |         |         |          |                                         | -17.5                      | n          | 0.7            | -16.7                              | 10.8                  | 28.7    | 10.5    | 3.19     | 2                       |                                  |       |
| Satterfield and Finney 2002 |         | R-834  | Red Lake  | 57.150   | -154.200  | AK          | 1983-00-00   | Scale    |             |                            |         |         |          |                                         | -17.2                      | n          | 0.5            | -16.6                              | 11.1                  | 26.8    | 9.8     | 3.19     | 2                       |                                  |       |
| Satterfield and Finney 2002 |         | R-665  | Red Lake  | 57.150   | -154.200  | AK          | 1966-00-00   | Scale    |             |                            |         |         |          |                                         | -17.2                      | n          | 0.3            | -16.8                              | 9.8                   | 27.9    | 10.2    | 3.19     | 2                       |                                  |       |
| Satterfield and Finney 2002 |         | R-881  | Red Lake  | 57.150   | -154.200  | AK          | 1988-00-00   | Scale    |             |                            |         |         |          |                                         | -17.8                      | n          | 0.6            | -17.2                              | 10.5                  | 23.8    | 8.7     | 3.19     | 2                       |                                  |       |
| Satterfield and Finney 2002 |         | R-742  | Red Lake  | 57.150   | -154.200  | AK          | 1974-00-00   | Scale    |             |                            |         |         |          |                                         | -16.5                      | n          | 0.4            | -16.1                              | 11.2                  | 25.2    | 9.2     | 3.19     | 2                       |                                  |       |
| Satterfield and Finney 2002 |         | R-772  | Red Lake  | 57.150   | -154.200  | AK          | 1977-00-00   | Scale    |             |                            |         |         |          |                                         | -17.7                      | n          | 0.4            | -17.2                              | 9.2                   | 25.3    | 9.2     | 3.21     | 2                       |                                  |       |
| Satterfield and Finney 2002 |         | R-664  | Red Lake  | 57.150   | -154.200  | AK          | 1966-00-00   | Scale    |             |                            |         |         |          |                                         | -18.2                      | n          | 0.3            | -17.9                              | 10.3                  | 24.0    | 8.6     | 3.25     | 2                       |                                  |       |
| Satterfield and Finney 2002 |         | R-992  | Red Lake  | 57.150   | -154.200  | AK          | 1999-00-00   | Scale    |             |                            |         |         |          |                                         | -17.3                      | n          | 0.8            | -16.5                              | 10.6                  | 26.8    | 9.6     | 3.26     | 2                       |                                  |       |
| Satterfield and Finney 2002 |         | R-993  | Red Lake  | 57.150   | -154.200  | AK          | 1999-00-00   | Scale    |             |                            |         |         |          |                                         | -17.6                      | n          | 0.8            | -16.9                              | 10.0                  | 28.2    | 10.1    | 3.26     | 2                       |                                  |       |

| Source/Donor                | Lab No. | Cat No          | Site Name                | Latitude | Longitude | Prov. State | Capture Date | Material | Col. Yld. % | Mus. $\delta^{13}\text{C}$ | Mus. %C | Mus. %N | Mus. C:N | Mus. $\delta^{13}\text{C}$ , lipid cor. | Col. $\delta^{13}\text{C}$ | Form. cor. | Suess cor. (‰) | $\delta^{13}\text{C}_{\text{cor}}$ | $\delta^{15}\text{N}$ | Col. %C | Col. %N | Col. C:N | <i>A priori</i> ecotype | $\delta^{13}\text{C}$ ecotype ID | Notes |
|-----------------------------|---------|-----------------|--------------------------|----------|-----------|-------------|--------------|----------|-------------|----------------------------|---------|---------|----------|-----------------------------------------|----------------------------|------------|----------------|------------------------------------|-----------------------|---------|---------|----------|-------------------------|----------------------------------|-------|
| Satterfield and Finney 2002 |         | R-891           | Red Lake                 | 57.150   | -154.200  | AK          | 1989-00-00   | Scale    |             |                            |         |         |          |                                         | -18.2                      | n          | 0.6            | -17.6                              | 10.3                  | 25.3    | 9.0     | 3.28     | 2                       |                                  |       |
| Satterfield and Finney 2002 |         | R-675           | Red Lake                 | 57.150   | -154.200  | AK          | 1967-00-00   | Scale    |             |                            |         |         |          |                                         | -17.6                      | n          | 0.3            | -17.2                              | 10.0                  | 49.2    | 17.5    | 3.28     | 2                       |                                  |       |
| Satterfield and Finney 2002 |         | R-771           | Red Lake                 | 57.150   | -154.200  | AK          | 1977-00-00   | Scale    |             |                            |         |         |          |                                         | -18.4                      | n          | 0.4            | -18.0                              | 8.8                   | 26.0    | 9.2     | 3.30     | 2                       |                                  |       |
| Satterfield and Finney 2002 |         | R-701           | Red Lake                 | 57.150   | -154.200  | AK          | 1970-00-00   | Scale    |             |                            |         |         |          |                                         | -18.3                      | n          | 0.4            | -18.0                              | 9.4                   | 22.9    | 8.1     | 3.30     | 2                       |                                  |       |
| Satterfield and Finney 2002 |         | R-711           | Red Lake                 | 57.150   | -154.200  | AK          | 1971-00-00   | Scale    |             |                            |         |         |          |                                         | -18.0                      | n          | 0.4            | -17.6                              | 9.3                   | 25.2    | 8.9     | 3.30     | 2                       |                                  |       |
| Satterfield and Finney 2002 |         | R-964           | Red Lake                 | 57.150   | -154.200  | AK          | 1996-00-00   | Scale    |             |                            |         |         |          |                                         | -17.3                      | n          | 0.7            | -16.6                              | 10.0                  | 26.7    | 9.4     | 3.31     | 2                       |                                  |       |
| Satterfield and Finney 2002 |         | R-785           | Red Lake                 | 57.150   | -154.200  | AK          | 1978-00-00   | Scale    |             |                            |         |         |          |                                         | -18.3                      | n          | 0.4            | -17.8                              | 8.7                   | 24.2    | 8.5     | 3.32     | 2                       |                                  |       |
| Satterfield and Finney 2002 |         | R-892           | Red Lake                 | 57.150   | -154.200  | AK          | 1989-00-00   | Scale    |             |                            |         |         |          |                                         | -18.4                      | n          | 0.6            | -17.8                              | 10.3                  | 23.3    | 8.1     | 3.35     | 2                       |                                  |       |
| Satterfield and Finney 2002 |         | RED-1           | Redoubt Lake             | 56.530   | -135.150  | AK          | 1996-00-00   | Muscle   |             | -20.4                      | 50.3    | 15.2    | 3.3      | -21.3                                   | *-17.6                     | n          | 0.7            | -16.9                              | 11.5                  |         |         |          | 2                       |                                  |       |
| Qin and Kaeriyama 2016      |         | 112             | South-eastern Bering Sea | 56.000   | -166.000  |             | 2007-00-00   | Muscle   |             |                            | 45.5    | 14.6    | 3.6      | -20.1                                   | *-16.4                     | n          | 1.0            | -15.4                              | 11.0                  |         |         |          | 2                       |                                  |       |
| Qin and Kaeriyama 2016      |         | 110             | South-eastern Bering Sea | 56.000   | -166.000  |             | 2007-00-00   | Muscle   |             |                            | 44.5    | 13.1    | 4.0      | -20.0                                   | *-16.3                     | n          | 1.0            | -15.3                              | 11.0                  |         |         |          | 2                       |                                  |       |
| Qin and Kaeriyama 2016      |         | 111             | South-eastern Bering Sea | 56.000   | -166.000  |             | 2007-00-00   | Muscle   |             |                            | 53.8    | 15.4    | 4.1      | -19.8                                   | *-16.1                     | n          | 1.0            | -15.1                              | 11.9                  |         |         |          | 2                       |                                  |       |
| Satterfield and Finney 2002 |         | SPECL-3         | Speel Lake               | 58.120   | -133.340  | AK          | 1992-00-00   | Muscle   |             | -20.7                      | 48.8    | 13.6    | 3.6      | -21.3                                   | *-17.6                     | n          | 0.6            | -16.9                              | 10.9                  |         |         |          | 2                       |                                  |       |
| Satterfield and Finney 2002 |         | SPECL-5         | Speel Lake               | 58.120   | -133.340  | AK          | 1992-00-00   | Muscle   |             | -21.5                      | 48.8    | 13.3    | 3.7      | -21.9                                   | *-18.2                     | n          | 0.6            | -17.6                              | 11.2                  |         |         |          | 2                       |                                  |       |
| Satterfield and Finney 2002 |         | SPECL-6         | Speel Lake               | 58.120   | -133.340  | AK          | 1992-00-00   | Muscle   |             | -22.4                      | 53.5    | 10.3    | 5.2      | -21.3                                   | *-17.6                     | n          | 0.6            | -17.0                              | 12.0                  |         |         |          | 2                       |                                  |       |
| Satterfield and Finney 2002 |         | SWEETHEART-3a,b | Sweetheart Lake          | 57.580   | -133.350  | AK          | 1996-00-00   | Muscle   |             | -19.8                      | 47.0    | 13.8    | 3.4      | -20.6                                   | *-16.9                     | n          | 0.7            | -16.2                              | 10.9                  |         |         |          | 2                       |                                  |       |
| Satterfield and Finney 2002 |         | SWEETHEART-2    | Sweetheart Lake          | 57.580   | -133.350  | AK          | 1996-00-00   | Muscle   |             | -21.1                      | 49.4    | 13.3    | 3.7      | -21.5                                   | *-17.8                     | n          | 0.7            | -17.1                              | 11.6                  |         |         |          | 2                       |                                  |       |
| Satterfield and Finney 2002 |         | SWEETHEART-4a,b | Sweetheart Lake          | 57.580   | -133.350  | AK          | 1996-00-00   | Muscle   |             | -21.0                      | 49.3    | 12.8    | 3.8      | -21.2                                   | *-17.5                     | n          | 0.7            | -16.8                              | 10.9                  |         |         |          | 2                       |                                  |       |
| Satterfield and Finney 2002 |         | SWEETHEART-1    | Sweetheart Lake          | 57.580   | -133.350  | AK          | 1996-00-00   | Muscle   |             | -21.2                      | 51.1    | 12.8    | 4.0      | -21.2                                   | *-17.5                     | n          | 0.7            | -16.8                              | 11.9                  |         |         |          | 2                       |                                  |       |
| Welch and Parsons 1993      |         | NA              | Takla Lake               | 55.397   | -125.855  | BC          | 1991-00-00   | Muscle   |             |                            |         |         |          | -20.8                                   | *-17.1                     | n          | 0.6            | -16.5                              | 10.6                  |         |         |          | 2                       |                                  |       |
| Welch and Parsons 1993      |         | NA              | Takla Lake               | 55.397   | -125.855  | BC          | 1991-00-00   | Muscle   |             |                            |         |         |          | -20.7                                   | *-17.0                     | n          | 0.6            | -16.3                              | 12.4                  |         |         |          | 2                       |                                  |       |
| Welch and Parsons 1993      |         | NA              | Takla Lake               | 55.397   | -125.855  | BC          | 1991-00-00   | Muscle   |             |                            |         |         |          | -20.7                                   | *-17.0                     | n          | 0.6            | -16.3                              | 12.1                  |         |         |          | 2                       |                                  |       |
| Welch and Parsons 1993      |         | NA              | Takla Lake               | 55.397   | -125.855  | BC          | 1991-00-00   | Muscle   |             |                            |         |         |          | -20.7                                   | *-17.0                     | n          | 0.6            | -16.3                              | 11.6                  |         |         |          | 2                       |                                  |       |
| Welch and Parsons 1993      |         | NA              | Takla Lake               | 55.397   | -125.855  | BC          | 1991-00-00   | Muscle   |             |                            |         |         |          | -20.6                                   | *-16.9                     | n          | 0.6            | -16.3                              | 11.2                  |         |         |          | 2                       |                                  |       |
| Welch and Parsons 1993      |         | NA              | Takla Lake               | 55.397   | -125.855  | BC          | 1991-00-00   | Muscle   |             |                            |         |         |          | -20.6                                   | *-16.9                     | n          | 0.6            | -16.3                              | 12.1                  |         |         |          | 2                       |                                  |       |
| Welch and Parsons 1993      |         | NA              | Takla Lake               | 55.397   | -125.855  | BC          | 1991-00-00   | Muscle   |             |                            |         |         |          | -20.5                                   | *-16.8                     | n          | 0.6            | -16.2                              | 10.7                  |         |         |          | 2                       |                                  |       |
| Welch and Parsons 1993      |         | NA              | Takla Lake               | 55.397   | -125.855  | BC          | 1991-00-00   | Muscle   |             |                            |         |         |          | -20.4                                   | *-16.7                     | n          | 0.6            | -16.1                              | 11.6                  |         |         |          | 2                       |                                  |       |
| Welch and Parsons 1993      |         | NA              | Takla Lake               | 55.397   | -125.855  | BC          | 1991-00-00   | Muscle   |             |                            |         |         |          | -20.3                                   | *-16.6                     | n          | 0.6            | -16.0                              | 11.4                  |         |         |          | 2                       |                                  |       |
| Welch and Parsons 1993      |         | NA              | Takla Lake               | 55.397   | -125.855  | BC          | 1991-00-00   | Muscle   |             |                            |         |         |          | -20.3                                   | *-16.6                     | n          | 0.6            | -16.0                              | 11.7                  |         |         |          | 2                       |                                  |       |
| Welch and Parsons 1993      |         | NA              | Takla Lake               | 55.397   | -125.855  | BC          | 1991-00-00   | Muscle   |             |                            |         |         |          | -20.2                                   | *-16.6                     | n          | 0.6            | -15.9                              | 11.7                  |         |         |          | 2                       |                                  |       |
| Welch and Parsons 1993      |         | NA              | Takla Lake               | 55.397   | -125.855  | BC          | 1991-00-00   | Muscle   |             |                            |         |         |          | -20.1                                   | *-16.4                     | n          | 0.6            | -15.8                              | 12.3                  |         |         |          | 2                       |                                  |       |
| Qin and Kaeriyama 2016      |         | 49              | Western Bering Sea       | 56.590   | 177.590   |             | 2009-00-00   | Muscle   |             |                            | 30.8    | 9.8     | 3.7      | -21.1                                   | *-17.4                     | n          | 1.0            | -16.4                              | 11.1                  |         |         |          | 2                       |                                  |       |
| Qin and Kaeriyama 2016      |         | 46              | Western Bering Sea       | 56.590   | 177.590   |             | 2009-00-00   | Muscle   |             |                            | 46.5    | 14.9    | 3.6      | -20.9                                   | *-17.2                     | n          | 1.0            | -16.2                              | 12.0                  |         |         |          | 2                       |                                  |       |
| Qin and Kaeriyama 2016      |         | 54              | Western Bering Sea       | 55.410   | 178.000   |             | 2009-00-00   | Muscle   |             |                            | 47.5    | 13.6    | 4.1      | -20.9                                   | *-17.2                     | n          | 1.0            | -16.2                              | 10.9                  |         |         |          | 2                       |                                  |       |
| Qin and Kaeriyama 2016      |         | 37              | Western Bering Sea       | 56.010   | 179.580   |             | 2009-00-00   | Muscle   |             |                            | 48.0    | 14.7    | 3.8      | -20.8                                   | *-17.1                     | n          | 1.0            | -16.1                              | 11.4                  |         |         |          | 2                       |                                  |       |
| Qin and Kaeriyama 2016      |         | 58              | Western Bering Sea       | 55.410   | 178.000   |             | 2009-00-00   | Muscle   |             |                            | 47.7    | 14.5    | 3.8      | -20.7                                   | *-17.0                     | n          | 1.0            | -16.0                              | 10.8                  |         |         |          | 2                       |                                  |       |
| Qin and Kaeriyama 2016      |         | 44              | Western Bering Sea       | 56.590   | 177.590   |             | 2009-00-00   | Muscle   |             |                            | 46.4    | 15.3    | 3.5      | -20.6                                   | *-16.9                     | n          | 1.0            | -15.9                              | 11.3                  |         |         |          | 2                       |                                  |       |
| Qin and Kaeriyama 2016      |         | 47              | Western Bering Sea       | 56.590   | 177.590   |             | 2009-00-00   | Muscle   |             |                            | 44.7    | 14.5    | 3.6      | -20.6                                   | *-16.9                     | n          | 1.0            | -15.9                              | 11.9                  |         |         |          | 2                       |                                  |       |
| Qin and Kaeriyama 2016      |         | 38              | Western Bering Sea       | 56.010   | 179.580   |             | 2009-00-00   | Muscle   |             |                            | 46.9    | 14.1    | 3.9      | -20.6                                   | *-16.9                     | n          | 1.0            | -15.9                              | 11.8                  |         |         |          | 2                       |                                  |       |
| Qin and Kaeriyama 2016      |         | 55              | Western Bering Sea       | 55.410   | 178.000   |             | 2009-00-00   | Muscle   |             |                            | 45.2    | 15.2    | 3.5      | -20.6                                   | *-16.9                     | n          | 1.0            | -15.9                              | 11.9                  |         |         |          | 2                       |                                  |       |
| Qin and Kaeriyama 2016      |         | 50              | Western Bering Sea       | 56.590   | 177.590   |             | 2009-00-00   | Muscle   |             |                            | 46.0    | 14.8    | 3.6      | -20.5                                   | *-16.8                     | n          | 1.0            | -15.8                              | 11.7                  |         |         |          | 2                       |                                  |       |
| Qin and Kaeriyama 2016      |         | 34              | Western Bering Sea       | 56.010   | 179.580   |             | 2009-00-00   | Muscle   |             |                            | 48.3    | 15.3    | 3.7      | -20.4                                   | *-16.7                     | n          | 1.0            | -15.7                              | 11.2                  |         |         |          | 2                       |                                  |       |
| Qin and Kaeriyama 2016      |         | 52              | Western Bering Sea       | 56.590   | 177.590   |             | 2009-00-00   | Muscle   |             |                            | 42.8    | 13.7    | 3.6      | -20.4                                   | *-16.7                     | n          | 1.0            | -15.6                              | 11.9                  |         |         |          | 2                       |                                  |       |
| Qin and Kaeriyama 2016      |         | 62              | Western Bering Sea       | 55.410   | 178.000   |             | 2009-00-00   | Muscle   |             |                            | 43.0    | 14.1    | 3.6      | -20.4                                   | *-16.7                     | n          | 1.0            | -15.6                              | 10.3                  |         |         |          | 2                       |                                  |       |
| Qin and Kaeriyama 2016      |         | 60              | Western Bering Sea       | 55.410   | 178.000   |             | 2009-00-00   | Muscle   |             |                            | 44.4    | 14.9    | 3.5      | -20.3                                   | *-16.6                     | n          | 1.0            | -15.6                              | 11.1                  |         |         |          | 2                       |                                  |       |
| Qin and Kaeriyama 2016      |         | 56              | Western Bering Sea       | 55.410   | 178.000   |             | 2009-00-00   | Muscle   |             |                            | 48.1    | 14.8    | 3.8      | -20.3                                   | *-16.6                     | n          | 1.0            | -15.6                              | 11.5                  |         |         |          | 2                       |                                  |       |
| Qin and Kaeriyama 2016      |         | 61              | Western Bering Sea       | 55.410   | 178.000   |             | 2009-00-00   | Muscle   |             |                            | 45.3    | 15.1    | 3.5      | -20.1                                   | *-16.4                     | n          | 1.0            | -15.4                              | 12.0                  |         |         |          | 2                       |                                  |       |
| Qin and Kaeriyama 2016      |         | 40              | Western Bering Sea       | 56.010   | 179.580   |             | 2009-00-00   | Muscle   |             |                            | 31.2    | 9.8     | 3.7      | -20.1                                   | *-16.4                     | n          | 1.0            | -15.3                              | 11.9                  |         |         |          | 2                       |                                  |       |
| Qin and Kaeriyama 2016      |         | 59              | Western Bering Sea       | 55.410   | 178.000   |             | 2009-00-00   | Muscle   |             |                            | 46.8    | 13.3    | 4.1      | -19.9                                   | *-16.2                     | n          | 1.0            | -15.2                              | 11.9                  |         |         |          | 2                       |                                  |       |
| Qin and Kaeriyama 2016      |         | 35              | Western Bering Sea       | 56.010   | 179.580   |             | 2009-00-00   | Muscle   |             |                            | 49.0    | 15.2    | 3.8      | -19.9                                   | *-16.2                     | n          | 1.0            | -15.2                              | 11.6                  |         |         |          | 2                       |                                  |       |

| Source/Donor           | Lab No. | Cat No | Site Name              | Latitude | Longitude | Prov. State | Capture Date | Material | Col. Yld. % | Mus. $\delta^{13}\text{C}$ | Mus. %C | Mus. %N | Mus. C:N | Mus. $\delta^{13}\text{C}$ , lipid cor. | Col. $\delta^{13}\text{C}$ | Form. cor. | Suess cor. (‰) | $\delta^{13}\text{C}_{\text{cor}}$ | $\delta^{15}\text{N}$ | Col. %C | Col. %N | Col. C:N | <i>A priori</i> ecotype | $\delta^{13}\text{C}$ ecotype ID | Notes |
|------------------------|---------|--------|------------------------|----------|-----------|-------------|--------------|----------|-------------|----------------------------|---------|---------|----------|-----------------------------------------|----------------------------|------------|----------------|------------------------------------|-----------------------|---------|---------|----------|-------------------------|----------------------------------|-------|
| Qin and Kaeriyama 2016 |         | 36     | Western Bering Sea     | 56.010   | 179.580   |             | 2009-00-00   | Muscle   |             |                            | 44.2    | 13.8    | 3.7      | -19.9                                   | *-16.2                     | n          | 1.0            | -15.2                              | 11.5                  |         |         |          | 2                       |                                  |       |
| Qin and Kaeriyama 2016 |         | 51     | Western Bering Sea     | 56.590   | 177.590   |             | 2009-00-00   | Muscle   |             |                            | 45.9    | 15.2    | 3.5      | -19.8                                   | *-16.1                     | n          | 1.0            | -15.1                              | 11.8                  |         |         |          | 2                       |                                  |       |
| Qin and Kaeriyama 2016 |         | 57     | Western Bering Sea     | 55.410   | 178.000   |             | 2009-00-00   | Muscle   |             |                            | 48.6    | 14.1    | 4.0      | -19.8                                   | *-16.1                     | n          | 1.0            | -15.1                              | 11.6                  |         |         |          | 2                       |                                  |       |
| Qin and Kaeriyama 2016 |         | 53     | Western Bering Sea     | 55.410   | 178.000   |             | 2009-00-00   | Muscle   |             |                            | 46.0    | 15.1    | 3.5      | -19.8                                   | *-16.1                     | n          | 1.0            | -15.1                              | 12.0                  |         |         |          | 2                       |                                  |       |
| Qin and Kaeriyama 2016 |         | 45     | Western Bering Sea     | 56.590   | 177.590   |             | 2009-00-00   | Muscle   |             |                            | 44.3    | 14.8    | 3.5      | -19.7                                   | *-16.0                     | n          | 1.0            | -15.0                              | 12.3                  |         |         |          | 2                       |                                  |       |
| Qin and Kaeriyama 2016 |         | 42     | Western Bering Sea     | 56.010   | 179.580   |             | 2009-00-00   | Muscle   |             |                            | 50.6    | 15.3    | 3.9      | -19.5                                   | *-15.9                     | n          | 1.0            | -14.8                              | 12.6                  |         |         |          | 2                       |                                  |       |
| Qin and Kaeriyama 2016 |         | 43     | Western Bering Sea     | 56.010   | 179.580   |             | 2009-00-00   | Muscle   |             |                            | 46.6    | 14.8    | 3.7      | -19.5                                   | *-15.8                     | n          | 1.0            | -14.7                              | 12.2                  |         |         |          | 2                       |                                  |       |
| Qin and Kaeriyama 2016 |         | 48     | Western Bering Sea     | 56.590   | 177.590   |             | 2009-00-00   | Muscle   |             |                            | 44.4    | 14.4    | 3.6      | -19.3                                   | *-15.6                     | n          | 1.0            | -14.6                              | 12.9                  |         |         |          | 2                       |                                  |       |
| Qin and Kaeriyama 2016 |         | 39     | Western Bering Sea     | 56.010   | 179.580   |             | 2009-00-00   | Muscle   |             |                            | 43.4    | 13.5    | 3.7      | -19.1                                   | *-15.4                     | n          | 1.0            | -14.3                              | 11.9                  |         |         |          | 2                       |                                  |       |
| Qin and Kaeriyama 2016 |         | 41     | Western Bering Sea     | 56.010   | 179.580   |             | 2009-00-00   | Muscle   |             |                            | 43.6    | 13.8    | 3.7      | -19.0                                   | *-15.3                     | n          | 1.0            | -14.3                              | 11.8                  |         |         |          | 2                       |                                  |       |
| Qin and Kaeriyama 2016 |         | 90     | Western Subarctic Gyre | 48.590   | 165.230   |             | 2006-00-00   | Muscle   |             |                            | 46.0    | 13.1    | 4.1      | -21.5                                   | *-17.8                     | n          | 0.9            | -16.8                              | 11.8                  |         |         |          | 2                       |                                  |       |
| Qin and Kaeriyama 2016 |         | 88     | Western Subarctic Gyre | 48.590   | 165.230   |             | 2006-00-00   | Muscle   |             |                            | 50.0    | 14.3    | 4.1      | -21.2                                   | *-17.5                     | n          | 0.9            | -16.6                              | 11.2                  |         |         |          | 2                       |                                  |       |
| Qin and Kaeriyama 2016 |         | 89     | Western Subarctic Gyre | 48.590   | 165.230   |             | 2006-00-00   | Muscle   |             |                            | 48.1    | 14.2    | 4.0      | -20.9                                   | *-17.2                     | n          | 0.9            | -16.3                              | 11.8                  |         |         |          | 2                       |                                  |       |
| Qin and Kaeriyama 2016 |         | 72     | Western Subarctic Gyre | 42.300   | 155.000   |             | 2007-00-00   | Muscle   |             |                            |         |         |          | -19.9                                   | *-16.3                     | n          | 1.0            | -15.3                              | 10.5                  |         |         |          | 2                       |                                  |       |
| Qin and Kaeriyama 2016 |         | 71     | Western Subarctic Gyre | 42.300   | 155.000   |             | 2007-00-00   | Muscle   |             |                            |         |         |          | -19.9                                   | *-16.2                     | n          | 1.0            | -15.2                              | 10.6                  |         |         |          | 2                       |                                  |       |
| Qin and Kaeriyama 2016 |         | 13     | Western Subarctic Gyre | 47.010   | 160.010   |             | 2009-00-00   | Muscle   |             |                            | 41.9    | 13.1    | 3.7      | -20.8                                   | *-17.1                     | n          | 1.0            | -16.1                              | 10.8                  |         |         |          | 2                       |                                  |       |
| Qin and Kaeriyama 2016 |         | 11     | Western Subarctic Gyre | 47.010   | 160.010   |             | 2009-00-00   | Muscle   |             |                            | 47.2    | 15.0    | 3.7      | -20.4                                   | *-16.7                     | n          | 1.0            | -15.7                              | 11.4                  |         |         |          | 2                       |                                  |       |
| Qin and Kaeriyama 2016 |         | 20     | Western Subarctic Gyre | 47.000   | 167.000   |             | 2009-00-00   | Muscle   |             |                            | 44.5    | 15.2    | 3.4      | -20.4                                   | *-16.7                     | n          | 1.0            | -15.7                              | 11.1                  |         |         |          | 2                       |                                  |       |
| Qin and Kaeriyama 2016 |         | 15     | Western Subarctic Gyre | 47.010   | 160.010   |             | 2009-00-00   | Muscle   |             |                            | 46.3    | 14.9    | 3.6      | -20.3                                   | *-16.6                     | n          | 1.0            | -15.6                              | 11.3                  |         |         |          | 2                       |                                  |       |
| Qin and Kaeriyama 2016 |         | 14     | Western Subarctic Gyre | 47.010   | 160.010   |             | 2009-00-00   | Muscle   |             |                            | 45.8    | 15.0    | 3.5      | -20.2                                   | *-16.5                     | n          | 1.0            | -15.5                              | 11.3                  |         |         |          | 2                       |                                  |       |
| Qin and Kaeriyama 2016 |         | 12     | Western Subarctic Gyre | 47.010   | 160.010   |             | 2009-00-00   | Muscle   |             |                            | 46.9    | 14.9    | 3.7      | -20.0                                   | *-16.3                     | n          | 1.0            | -15.3                              | 11.4                  |         |         |          | 2                       |                                  |       |
| Qin and Kaeriyama 2016 |         | 17     | Western Subarctic Gyre | 47.000   | 167.000   |             | 2009-00-00   | Muscle   |             |                            | 44.9    | 14.6    | 3.6      | -19.8                                   | *-16.1                     | n          | 1.0            | -15.1                              | 11.5                  |         |         |          | 2                       |                                  |       |
| Qin and Kaeriyama 2016 |         | 21     | Western Subarctic Gyre | 47.000   | 167.000   |             | 2009-00-00   | Muscle   |             |                            | 46.2    | 14.5    | 3.7      | -19.8                                   | *-16.1                     | n          | 1.0            | -15.1                              | 11.3                  |         |         |          | 2                       |                                  |       |
| Qin and Kaeriyama 2016 |         | 16     | Western Subarctic Gyre | 47.000   | 167.000   |             | 2009-00-00   | Muscle   |             |                            | 46.1    | 14.5    | 3.7      | -19.7                                   | *-16.1                     | n          | 1.0            | -15.0                              | 11.9                  |         |         |          | 2                       |                                  |       |
| Qin and Kaeriyama 2016 |         | 19     | Western Subarctic Gyre | 47.000   | 167.000   |             | 2009-00-00   | Muscle   |             |                            | 45.6    | 13.9    | 3.8      | -19.6                                   | *-15.9                     | n          | 1.0            | -14.9                              | 12.5                  |         |         |          | 2                       |                                  |       |
| Qin and Kaeriyama 2016 |         | 24     | Western Subarctic Gyre | 47.000   | 167.000   |             | 2009-00-00   | Muscle   |             |                            | 45.8    | 14.5    | 3.7      | -19.6                                   | *-15.9                     | n          | 1.0            | -14.9                              | 11.5                  |         |         |          | 2                       |                                  |       |
| Qin and Kaeriyama 2016 |         | 25     | Western Subarctic Gyre | 47.000   | 167.000   |             | 2009-00-00   | Muscle   |             |                            |         |         |          | -19.4                                   | *-15.7                     | n          | 1.0            | -14.7                              | 11.9                  |         |         |          | 2                       |                                  |       |
| Qin and Kaeriyama 2016 |         | 18     | Western Subarctic Gyre | 47.000   | 167.000   |             | 2009-00-00   | Muscle   |             |                            | 43.4    | 14.4    | 3.5      | -19.2                                   | *-15.5                     | n          | 1.0            | -14.5                              | 12.0                  |         |         |          | 2                       |                                  |       |
| Qin and Kaeriyama 2016 |         | 23     | Western Subarctic Gyre | 47.000   | 167.000   |             | 2009-00-00   | Muscle   |             |                            | 44.7    | 14.3    | 3.7      | -19.2                                   | *-15.5                     | n          | 1.0            | -14.5                              | 11.9                  |         |         |          | 2                       |                                  |       |
| Qin and Kaeriyama 2016 |         | 22     | Western Subarctic Gyre | 47.000   | 167.000   |             | 2009-00-00   | Muscle   |             |                            | 40.8    | 13.6    | 3.5      | -19.0                                   | *-15.3                     | n          | 1.0            | -14.3                              | 11.5                  |         |         |          | 2                       |                                  |       |

**Figure 1.** Stable carbon and nitrogen isotope compositions of *O. nerka* and *O. kisutch*.

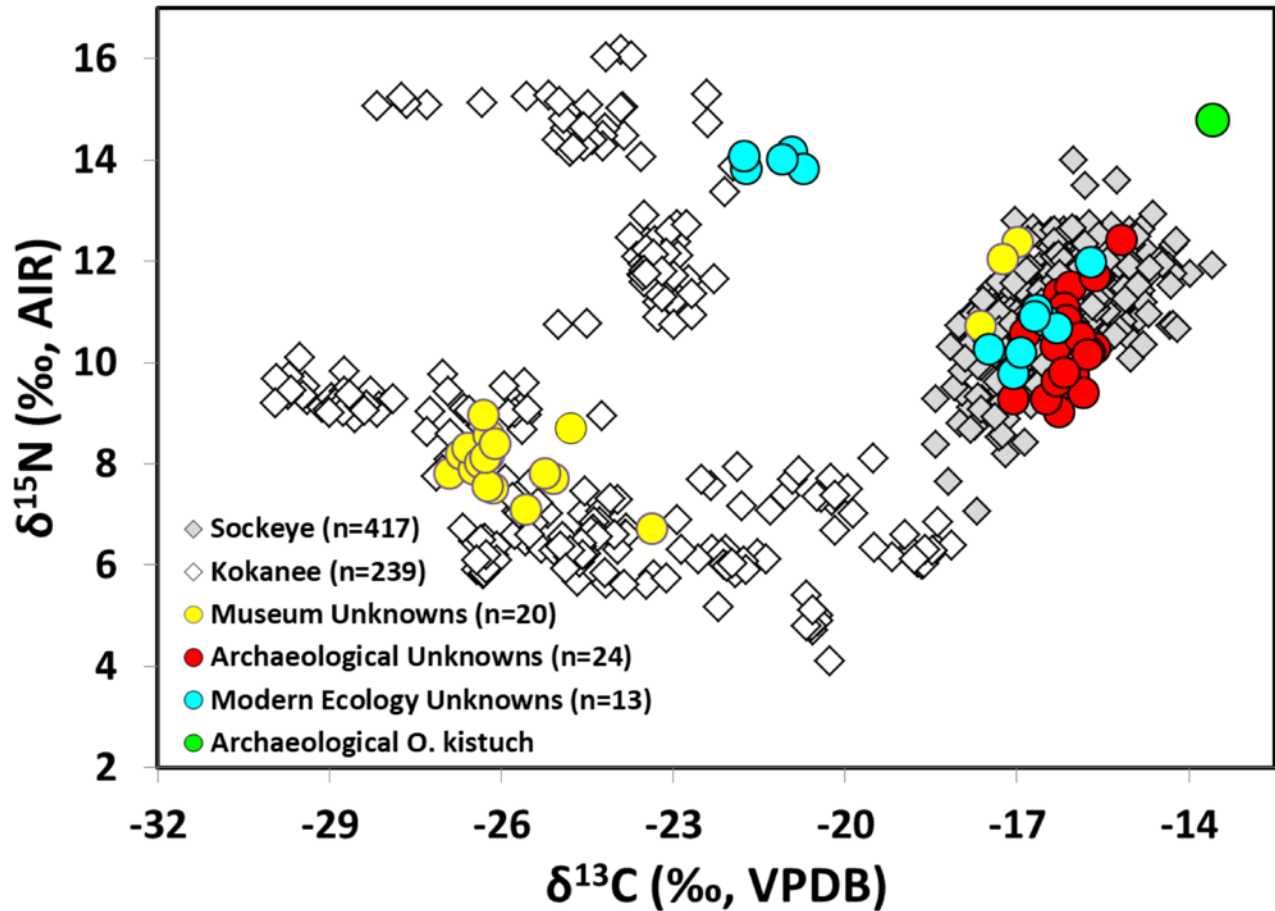

## References

- Guiry EJ, Szpak P, Richards MP. 2016. Effects of lipid extraction and ultrafiltration on stable carbon and nitrogen isotopic compositions of fish bone collagen. *Rapid Communications in Mass Spectrometry* 30(13):1591-1600.
- Horii S, Takahashi K, Furuya K. 2015. Effects of ethanol-preservation on stable carbon and nitrogen isotopic signatures in marine predators. *Plankton and Benthos Research* 10(2):91-97.
- Kaeriyama M, Nakamura M, Edpalina R, Bower J, Yamaguchi H, Walker R, Myers KW. 2004. Change in feeding ecology and trophic dynamics of Pacific salmon (*Oncorhynchus* spp.) in the central Gulf of Alaska in relation to climate events. *Fisheries Oceanography* 13(3):197-207.
- Meeuwig MH, Peacock MM. 2017. Food Web Interactions Associated With a Lahontan Cutthroat Trout Reintroduction Effort in an Alpine Lake. *Journal of Fish and Wildlife Management* 8(2):449-464.
- Molkentin J, Lehmann I, Ostermeyer U, Rehbein H. 2015. Traceability of organic fish—Authenticating the production origin of salmonids by chemical and isotopic analyses. *Food Control* 53:55-66.
- Overman NC, Parrish DL. 2001. Stable isotope composition of walleye:  $^{15}\text{N}$  accumulation with age and area-specific differences in  $\delta^{13}\text{C}$ . *Canadian Journal of Fisheries and Aquatic Sciences* 58(6):1253-1260.

- Qi H, Coplen TB, Geilmann H, Brand WA, Böhlke JK. 2003. Two new organic reference materials for  $\delta^{13}\text{C}$  and  $\delta^{15}\text{N}$  measurements and a new value for the  $\delta^{13}\text{C}$  of NBS 22 oil. *Rapid Communications in Mass Spectrometry* 17(22):2483-2487.
- Qi H, Coplen TB, Mroczkowski SJ, Brand WA, Brandes L, Geilmann H, Schimmelmann A. 2016. A new organic reference material, l-glutamic acid, USGS41a, for  $\delta^{13}\text{C}$  and  $\delta^{15}\text{N}$  measurements – a replacement for USGS41. *Rapid Communications in Mass Spectrometry* 30(7):859-866.
- Qin Y, Kaeriyama M. 2016. Feeding habits and trophic levels of Pacific salmon (*Oncorhynchus* spp.) in the North Pacific Ocean. *North Pacific Anadromous Fish Commission Bulletin* 6:469-481.
- Satterfield FR, Finney BP. 2002. Stable isotope analysis of Pacific salmon: insight into trophic status and oceanographic conditions over the last 30 years. *Progress in oceanography* 53(2):231-246.
- Szpak P, Metcalfe JZ, Macdonald RA. 2017. Best practices for calibrating and reporting stable isotope measurements in archaeology. *Journal of Archaeological Science: Reports* 13:609-616.
- Wang YV, Wan AH, Lock E-J, Andersen N, Winter-Schuh C, Larsen T. 2018. Know your fish: A novel compound-specific isotope approach for tracing wild and farmed salmon. *Food chemistry* 256:380-389.
- Welch DW, Parsons TR. 1993.  $\delta^{13}\text{C}$  -  $\delta^{15}\text{N}$  values as indicators of trophic position and competitive overlap for Pacific salmon (*Oncorhynchus* spp.). *Fisheries Oceanography* 2(1):11-23.
